# Supplementary material for: Paternal High-Protein Diet Programs Offspring Insulin Sensitivity in a Sex-Specific Manner
Source: Biomolecules. 2021 May 18;11(5):751. doi: 10.3390/biom11050751 (PMC8157381; doi:10.3390/biom11050751)
Supplement: Supplementary file 1 [file biomolecules-11-00751-s001.zip › Table S1.xlsx]

## Sheet: HPDvsCD 
	baseMean	log2FoldChange	lfcSE	stat	pvalue	padj
GtRNAdb-mature-tRNA_CCA_end_Match_Genome-mature-tRNA-Lys-TTT_CCA_end	4193.75878723097	-1.54440926084551	0.342085282434175	-4.51469075154581	6.34092261546659e-06	0.000102692015040727
GtRNAdb-mature-tRNA_Match_Genome-mature-tRNA-SeC-TCA	49467.2722231486	1.39256513732111	0.309400228968054	4.50085360946805	6.76811084966101e-06	0.000108289773594576
miRBase-miRNA_Match_Genome-rno-mir-218a-1	345.053644197726	-1.65721402926823	0.373139906351129	-4.44126720584201	8.94306611299034e-06	0.000141385616643466
piRNAdb-piRNA_Match_Genome-rno-piR-19444	44.4104957584206	2.9914042372952	0.691224371916209	4.32768918289505	1.50681904248994e-05	0.000232884214433788
GtRNAdb-mature-tRNA_5_end_Match_Genome-mature-tRNA-Ile-AAT_5_end	29191.7114140624	1.51332889365033	0.349700758297981	4.32749674612036	1.50813572600194e-05	0.000232884214433788
GtRNAdb-mature-tRNA_3_end_Match_Genome-mature-tRNA-Pro-AGG_3_end	267.095560576788	1.70526089655949	0.395127586891711	4.31572219488394	1.59081943054044e-05	0.00024277828989773
miRBase-miRNA_Match_Genome-rno-mir-196a	1024.46905813105	-1.74385681165669	0.404302943576688	-4.31324292677558	1.60877180052713e-05	0.00024277828989773
miRBase-miRNA_Match_Genome-rno-mir-181d	199.579828484358	-1.72019188267693	0.401883497565682	-4.28032475355819	1.86620791028651e-05	0.000278463382568594
miRBase-miRNA_Match_Genome-rno-mir-497	135.160521402268	-1.73583183166891	0.406203049312854	-4.27331068687273	1.92591807744098e-05	0.000284179911871292
miRBase-miRNA_Match_Genome-rno-mir-484	81.1493302008653	-4.91551863410344	1.15252290551284	-4.2650073248793	1.99895643726868e-05	0.000291715840515693
miRBase-miRNA_Match_Genome-rno-mir-10a	33659.9046916701	-1.46327637619388	0.343598677883101	-4.25867871555583	2.05638778636216e-05	0.000295913533183004
GtRNAdb-mature-tRNA_5_end_Match_Genome-mature-tRNA-Glu-CTC_5_end	190382.706406975	-1.18899038190679	0.279305265619818	-4.25695655707834	2.07228603810387e-05	0.000295913533183004
miRBase-miRNA_Match_Genome-rno-mir-146a	4734.19676681607	-1.22134989186125	0.287428915661107	-4.24922415704785	2.14512180867986e-05	0.000303055506587963
GtRNAdb-mature-tRNA_3_end_Match_Genome-mature-tRNA-Leu-CAG_3_end	266.549103967358	1.72127537408561	0.406278419853349	4.23668915200302	2.26839832992755e-05	0.000317098208646714
GtRNAdb-mature-tRNA_Match_Genome-mature-tRNA-Leu-TAA	90329.0949604297	1.1473006776195	0.271242690409233	4.22979390113159	2.33905507777777e-05	0.000323569285759258
GtRNAdb-mature-tRNA_3_end_Match_Genome-mature-tRNA-Pro-TGG_3_end	227.268926401173	1.69637039760044	0.4033025169434	4.20619839037234	2.59702276305488e-05	0.000355551157663596
GtRNAdb-mature-tRNA_Match_Genome-mature-tRNA-Ile-TAT	501.957673236111	-2.07341995144532	0.494273041762414	-4.19488779734413	2.73006696431707e-05	0.00036995193149113
miRBase-miRNA_Match_Genome-rno-mir-30d	33672.0813565128	-1.26560108401241	0.303878734640538	-4.16482280508871	3.11594472325897e-05	0.000417977231564435
GtRNAdb-mature-tRNA_5_end_Match_Genome-mature-tRNA-Ser-GCT_5_end	551067.775250239	1.23437642769935	0.299016298618911	4.12812423068794	3.65734515654111e-05	0.000485695436788659
piRNAdb-piRNA_Match_Genome-rno-piR-28860	37.4378346303471	2.76710908899309	0.675127140845588	4.09864886416404	4.1556892342622e-05	0.000541054441480412
GtRNAdb-mature-tRNA_Match_Genome-mature-tRNA-Ser-GCT	565971.217756379	1.22545542671773	0.298844172550822	4.10065023606686	4.11990861339119e-05	0.000541054441480412
miRBase-miRNA_Match_Genome-rno-mir-27b	6944.23416492626	-1.18801777787857	0.290440679166675	-4.0903973275617	4.30634817082866e-05	0.000555226249598103
GtRNAdb-mature-tRNA_CCA_end_Match_Genome-mature-tRNA-Gly-CCC_CCA_end	335.435406799198	-1.31996223094963	0.328145944906596	-4.02248527351252	5.7587255855022e-05	0.000735344959379512
rRNAdb-rRNA_Unmatch_Genome-18S-rRNA	304.058983965812	-7.27200347966057	1.81293196530599	-4.01118388269643	6.04150310545791e-05	0.000764106297528391
GtRNAdb-mature-tRNA_CCA_end_Match_Genome-mature-tRNA-Gln-TTG_CCA_end	710.824833981651	-1.27285182226934	0.318041013388727	-4.0021625157935	6.27661603726686e-05	0.000786353405423622
miRBase-miRNA_Match_Genome-rno-mir-296	214.299127915847	-1.60368864764578	0.407733126227981	-3.93318213430881	8.38286700130911e-05	0.0010404156427793
GtRNAdb-mature-tRNA_Match_Genome-mature-tRNA-Glu-CTC	205069.185301664	-1.09048776356097	0.279064292748898	-3.90765781182255	9.31951690643997e-05	0.00114595541219929
GtRNAdb-mature-tRNA_5_end_Match_Genome-mature-tRNA-Arg-TCT_5_end	6455.82624338587	1.26797365056689	0.325087025100658	3.90041297456976	9.60287407864387e-05	0.00116996484187514
miRBase-miRNA_Match_Genome-rno-mir-671	57.7897459837139	-2.20598634029955	0.568200753991194	-3.88240656986834	0.000103427760252658	0.00124865514195936
piRNAdb-piRNA_Match_Genome-rno-piR-938	39.8537718854502	2.45494132141184	0.635179513846339	3.86495670577583	0.00011110890624797	0.00131668601484654
miRBase-miRNA_Match_Genome-rno-mir-181a-2	2235.64743619345	-1.30439287648965	0.337485442364911	-3.86503449555982	0.000111073500345431	0.00131668601484654
miRBase-miRNA_Match_Genome-rno-mir-30a	36291.6140671246	-1.34653147592807	0.348627876206417	-3.86237466315174	0.000112290178851804	0.00131668601484654
miRBase-miRNA_Match_Genome-rno-mir-193a	57.2367847107676	-2.50484221944936	0.648792889640633	-3.86077322893719	0.000113028769346767	0.00131668601484654
miRBase-miRNA_Match_Genome-rno-mir-139	185.399539764312	-1.68697507774044	0.438981340746529	-3.84293117076817	0.000121573572272084	0.00140391046936807
miRBase-miRNA_Match_Genome-rno-mir-181a-1	2212.15999664403	-1.30854004596084	0.341260180500379	-3.83443519265028	0.000125853147849041	0.00144080155468557
miRBase-miRNA_Match_Genome-rno-mir-328a	330.237292650954	-1.39780935012609	0.367067678189634	-3.80804258500787	0.000140071155314751	0.00158986747229051
miRBase-miRNA_Match_Genome-rno-mir-24-2	2671.9927098444	-1.43983591537153	0.379989488252907	-3.78914669979825	0.000151165630598539	0.00170125387656661
GtRNAdb-mature-tRNA_3_end_Match_Genome-mature-tRNA-Pro-CGG_3_end	113.084644442147	1.71828431845356	0.453744275841709	3.78690026505809	0.000152538290211284	0.00170227604538307
miRBase-miRNA_Match_Genome-rno-mir-24-1	2407.20729739511	-1.48823422786035	0.395819668563003	-3.75987942505052	0.000169995270360664	0.00188128099199135
rRNAdb-rRNA_Match_Genome-5.3S-rRNA	1039.09916651188	1.24755900906638	0.3341315896405	3.73373559323935	0.000188660552780951	0.00207058854622399
miRBase-miRNA_Match_Genome-rno-mir-10b	31672.6707059695	-1.29984846450631	0.349212124917672	-3.72223176618724	0.00019746963847233	0.00214950557287913
miRBase-miRNA_Match_Genome-rno-mir-181b-2	325.004583070792	-1.3782125121911	0.373238995587574	-3.69257373555365	0.000221995945967855	0.00239683427841716
miRBase-miRNA_Match_Genome-rno-mir-140	1787.40873541099	-1.06235971958723	0.289846145675776	-3.66525391293487	0.000247093308581922	0.00264628962739349
miRBase-miRNA_Match_Genome-rno-mir-322-1	131.150863217106	-1.61353554493442	0.442518368134576	-3.64625665537056	0.000266088220069637	0.00280448536708315
miRBase-miRNA_Match_Genome-rno-mir-322-2	131.150863217106	-1.61353554493442	0.442518368134576	-3.64625665537056	0.000266088220069637	0.00280448536708315
miRBase-miRNA_Match_Genome-rno-mir-204	2423.72983003791	-1.00704162261133	0.276767420455039	-3.63858441486945	0.000274140771755177	0.00286660586528248
GtRNAdb-mature-tRNA_5_end_Match_Genome-mature-tRNA-SeC-TCA_5_end	6392.58697462387	0.986139616175461	0.272801724992547	3.61485843318037	0.000300511787847132	0.00311780979891399
miRBase-miRNA_Match_Genome-rno-mir-30b	3778.80552663714	-1.02816199001649	0.285543723255783	-3.60071647975076	0.000317341479550138	0.00326689523133785
GtRNAdb-mature-tRNA_CCA_end_Unmatch_Genome-mature-tRNA-Thr-AGT_CCA_end	797.732510897917	-1.19357485683641	0.332255492118298	-3.59234048841981	0.000327721259569621	0.00334779871314198
miRBase-miRNA_Match_Genome-rno-mir-411	77.9037734157597	-1.62297768513372	0.45283715088758	-3.58402061746175	0.000338345360366122	0.00342994380584893
GtRNAdb-mature-tRNA_3_end_Match_Genome-mature-tRNA-SeC-TCA_3_end	19.543944451746	-3.68617987208411	1.03121414980018	-3.57460171856483	0.000350761429850439	0.00352887256698017
miRBase-miRNA_Match_Genome-rno-mir-451	869.130218948921	-1.06629387996969	0.299319742741307	-3.56239074043057	0.000367492869300275	0.00366940248444185
miRBase-miRNA_Match_Genome-rno-mir-203a	956.795588470918	-1.33217148708055	0.380617176076223	-3.50002987467324	0.000465206018576272	0.00461039994529321
GtRNAdb-mature-tRNA_Unmatch_Genome-mature-tRNA-Thr-AGT	818.221242130712	-1.15082515842125	0.329790108357996	-3.48956845355712	0.000483801130992689	0.00475916964413549
GtRNAdb-mature-tRNA_Match_Genome-mature-tRNA-Ala-TGC	69595.414405623	1.0559578763597	0.303067801254905	3.48422983895789	0.000493555453591366	0.00481942384095098
GtRNAdb-mature-tRNA_Match_Genome-mature-tRNA-Arg-TCG	7361.79472330465	1.07550472028031	0.309861715801174	3.470918365954	0.000518681658089365	0.00502780468571297
miRBase-miRNA_Match_Genome-rno-mir-433	13.1212076973005	-4.77991099148004	1.37820171733525	-3.4682230702208	0.000523912199097113	0.005041705800007
piRNAdb-piRNA_Match_Genome-rno-piR-19494	16.5844970422376	-3.75512813427763	1.09456083987041	-3.43071668334326	0.000601988974229532	0.00573229246076384
GtRNAdb-mature-tRNA_5_end_Match_Genome-mature-tRNA-Ala-TGC_5_end	66758.9832572996	1.04150335631247	0.303674199906751	3.42967350085153	0.000604307940140766	0.00573229246076384
miRBase-miRNA_Match_Genome-rno-mir-184	40.4469691551578	-2.1705288986512	0.634729908038659	-3.41961024864611	0.000627109150074455	0.00590638972552394
GtRNAdb-mature-tRNA_Unmatch_Genome-mature-tRNA-Leu-AAG	1372.6827802079	1.05153144510506	0.30937959579991	3.39883902940108	0.000676725325488413	0.00632881149470854
GtRNAdb-mature-tRNA_CCA_end_Unmatch_Genome-mature-tRNA-Leu-AAG_CCA_end	1322.61333369338	1.04998915404199	0.309646311569233	3.39093060311565	0.00069655736339566	0.00642770035982929
miRBase-miRNA_Match_Genome-rno-mir-708	35.144033969765	-2.33071380503448	0.687371176596127	-3.3907645307099	0.000696979557089923	0.00642770035982929
miRBase-miRNA_Match_Genome-rno-mir-142	824.324606229721	-0.980018481050375	0.289767101474431	-3.38209022371316	0.000719365136861818	0.00658839242587927
GtRNAdb-mature-tRNA_CCA_end_Unmatch_Genome-mature-tRNA-His-GTG_CCA_end	401.53123788061	1.12029021199614	0.333277623351034	3.36143243201229	0.000775393252349822	0.00705289204877098
piRNAdb-piRNA_Match_Genome-rno-piR-42398	23.3736619540148	-2.38332180846654	0.711115550724299	-3.35152536889263	0.000803676751162956	0.00726042670438371
miRBase-miRNA_Match_Genome-rno-mir-186	925.759469672671	-1.11434439124292	0.337609438404417	-3.30069087081643	0.000964470850892501	0.00865417087827866
GtRNAdb-mature-tRNA_Match_Genome-mature-tRNA-Arg-TCT	7142.90100275604	1.07562940387918	0.327926662445534	3.28009133462223	0.00103773485535616	0.00924907307324146
GtRNAdb-mature-tRNA_CCA_end_Match_Genome-mature-tRNA-Ser-CGA_CCA_end	38.9625907687496	-2.90999149960549	0.890025965332086	-3.26955798252438	0.00107715658676655	0.00953642631483982
miRBase-miRNA_Match_Genome-rno-mir-431	21.0336626025264	-3.27610222055937	1.00389156507836	-3.26340247744152	0.00110083063561989	0.00968147737816695
GtRNAdb-mature-tRNA_5_end_Match_Genome-mature-tRNA-Ser-CGA_5_end	5218.67994410871	0.861960992323393	0.265492708589633	3.24664657233849	0.00116773301821386	0.0102022990012369
GtRNAdb-mature-tRNA_CCA_end_Match_Genome-mature-tRNA-Leu-TAG_CCA_end	642.257026624648	-1.13807506300152	0.353543690638369	-3.21905069482807	0.00128615744914444	0.0111635104082603
GtRNAdb-mature-tRNA_Match_Genome-mature-tRNA-Ile-AAT	39276.7551107473	1.07023512367707	0.332695272783678	3.21686303121279	0.00129600454660555	0.0111759353109881
miRBase-miRNA_Match_Genome-rno-mir-326	64.7945511449425	-2.19768413582759	0.686176936872506	-3.20279510681941	0.00136100775651941	0.0116607632300502
GtRNAdb-mature-tRNA_Match_Genome-mature-tRNA-Thr-TGT	12853.7106107036	0.865834408175457	0.270680990916105	3.19872631338125	0.00138036142998595	0.0117507690962907
miRBase-miRNA_Match_Genome-rno-mir-103-1	2303.81734625217	-0.977527564878229	0.306690270189168	-3.18734456191025	0.00143585611392952	0.0121453306961681
GtRNAdb-mature-tRNA_Unmatch_Genome-mature-tRNA-Leu-TAG	591.494069928557	1.0052961534118	0.31669829126764	3.17430242325568	0.00150197107426038	0.0126241619406189
GtRNAdb-mature-tRNA_CCA_end_Unmatch_Genome-mature-tRNA-Leu-TAA_CCA_end	437.790082282748	0.968427898554812	0.305403259403482	3.17098088752019	0.00151925138600332	0.012689093337185
piRNAdb-piRNA_Match_Genome-rno-piR-10906	12.7527756212764	-4.27425585414098	1.35528502264454	-3.15376897311291	0.00161176624465033	0.0133776598305978
GtRNAdb-mature-tRNA_CCA_end_Unmatch_Genome-mature-tRNA-Leu-TAG_CCA_end	570.930370393305	0.997001689118795	0.317767636473596	3.13751803104606	0.0017038479387824	0.0140540997683417
miRBase-miRNA_Match_Genome-rno-mir-342	784.812776070954	-0.998376100470437	0.318986321196817	-3.12983985245697	0.00174901626496172	0.0143376148140072
miRBase-miRNA_Match_Genome-rno-mir-148b	305.042501209959	-1.08273153350848	0.347046587220504	-3.11984492393391	0.00180946273915173	0.0146904970742746
miRBase-miRNA_Match_Genome-rno-mir-3068	218.933731011939	1.25575845813609	0.402794240469638	3.11761771139513	0.00182319124012755	0.0146904970742746
GtRNAdb-mature-tRNA_CCA_end_Unmatch_Genome-mature-tRNA-Arg-TCT_CCA_end	420.676087582828	-1.06927030023636	0.34301332289488	-3.11728504074475	0.00182525001299345	0.0146904970742746
miRBase-miRNA_Match_Genome-rno-mir-92a-2	648.270000726487	-0.972689716802422	0.313263416180653	-3.10502173749357	0.00190265041182424	0.015221203294594
GtRNAdb-mature-tRNA_3_end_Match_Genome-mature-tRNA-Thr-CGT_3_end	36.2957864332252	2.11050392341391	0.680873302961168	3.09970138972283	0.00193715834119179	0.0154044687251658
miRBase-miRNA_Match_Genome-rno-mir-664-1	86.72890603317	-1.42209639097649	0.45965117805591	-3.0938599939877	0.00197570697178327	0.0156174932055249
miRBase-miRNA_Match_Genome-rno-mir-103-2	2350.20632157984	-0.951205344445829	0.309578316546264	-3.0725838781531	0.00212214183718221	0.0166757654424732
piRNAdb-piRNA_Match_Genome-rno-piR-43737	63.0355447088156	1.66944283237035	0.547139060456612	3.05122217188648	0.00227911863105482	0.0178039384825929
miRBase-miRNA_Match_Genome-rno-mir-505	176.96743390269	-1.10427150916885	0.364946928715441	-3.02584135467511	0.00247942357107438	0.0192554064467063
GtRNAdb-mature-tRNA_5_end_Match_Genome-mature-tRNA-Leu-TAG_5_end	20809.0986556453	0.902373006649438	0.30044586095692	3.00344629070735	0.00266940661458526	0.020610302233542
GtRNAdb-mature-tRNA_Match_Genome-mature-tRNA-Ser-CGA	6161.05494434025	0.804029941478098	0.268612106393374	2.99327514412407	0.00276000802832811	0.021066624388973
miRBase-miRNA_Match_Genome-rno-mir-337	29.8507550329512	-2.28573140938337	0.763628633681497	-2.99325000211652	0.00276023542445881	0.021066624388973
miRBase-miRNA_Match_Genome-rno-mir-149	118.37391056326	-1.35192138025328	0.453189863465447	-2.98312360721272	0.00285322737973094	0.021651919773044
GtRNAdb-mature-tRNA_Unmatch_Genome-mature-tRNA-Leu-TAA	459.319817900771	0.897819940772509	0.301192864810394	2.98088051102307	0.00287420916261696	0.0216872145906553
miRBase-miRNA_Match_Genome-rno-mir-664-2	138.913834541182	-1.14601438367927	0.386446152488677	-2.96552152557101	0.00302170198462339	0.0226713007659879
miRBase-miRNA_Match_Genome-rno-mir-187	72.9649745506307	-1.42746471827259	0.484393710396531	-2.94691010150411	0.00320966500452369	0.0239462647528509
GtRNAdb-mature-tRNA_5_end_Match_Genome-mature-tRNA-Leu-CAA_5_end	4822.16364955407	0.85797245656405	0.292130426330007	2.93695000326613	0.00331457536605118	0.0245908161235529
GtRNAdb-mature-tRNA_5_end_Match_Genome-mature-tRNA-iMet-CAT_5_end	18467.7390488578	0.882320000066689	0.301626058180997	2.92521145350523	0.00344222236951832	0.0253959517040018
miRBase-miRNA_Match_Genome-rno-mir-6324	192.64973537348	-1.48880698121245	0.512571773230383	-2.90458245843219	0.00367743321530999	0.0269813884526612
GtRNAdb-mature-tRNA_Match_Genome-mature-tRNA-Leu-TAG	23919.8783941016	0.839629891381304	0.292416100395967	2.87135315136323	0.00408718632455609	0.029822985928629
piRNAdb-piRNA_Match_Genome-rno-piR-16131	15.6049391882714	-2.64266561317158	0.926375179840266	-2.85269475119924	0.00433502403580519	0.0313301231604484
miRBase-miRNA_Match_Genome-rno-mir-345	45.8630815919159	-1.88267684703909	0.660064317419828	-2.85226272251531	0.0043409206788573	0.0313301231604484
GtRNAdb-mature-tRNA_CCA_end_Unmatch_Genome-mature-tRNA-Glu-CTC_CCA_end	4950.92847236212	0.903073016151393	0.31712961728816	2.84764640992461	0.00440438297585485	0.0316163275239743
miRBase-miRNA_Match_Genome-rno-mir-1247	62.6102131940262	-1.58749375102125	0.562002361064467	-2.82471010978396	0.00473234098245543	0.0337878969069936
GtRNAdb-mature-tRNA_CCA_end_Unmatch_Genome-mature-tRNA-Val-CAC_CCA_end	4996.00213135248	0.777964778474503	0.275912808110547	2.81960371394866	0.00480829897933642	0.0341466366019185
GtRNAdb-mature-tRNA_3_end_Match_Genome-mature-tRNA-iMet-CAT_3_end	49.5634578374292	-1.50243437216305	0.533207674262633	-2.81772833491332	0.004836471206959	0.0341640093768168
piRNAdb-piRNA_Match_Genome-rno-piR-6351	19.5830119892521	2.78347217057606	0.988776704547093	2.81506649355279	0.00487671424011225	0.0342660132850215
GtRNAdb-mature-tRNA_5_end_Match_Genome-mature-tRNA-Leu-AAG_5_end	70092.1239591673	0.889120322565826	0.317172402593902	2.80327139213379	0.00505870812934899	0.0353577073461866
piRNAdb-piRNA_Match_Genome-rno-piR-61006	58.5638916521286	1.55649586347523	0.55559256100882	2.80150594646015	0.00508647037018905	0.0353656159770212
GtRNAdb-mature-tRNA_Match_Genome-mature-tRNA-Ala-CGC	27374.2561404509	0.815891960512417	0.293008388090097	2.78453448322967	0.00536046208931198	0.0370765294510745
GtRNAdb-mature-tRNA_Match_Genome-mature-tRNA-Arg-CCG	7410.77401602884	0.809866003456022	0.29204847028058	2.77305339993035	0.00555330071619323	0.0381205110051132
GtRNAdb-mature-tRNA_CCA_end_Match_Genome-mature-tRNA-Phe-GAA_CCA_end	2886.85365199127	-0.897444095207695	0.323736259135807	-2.77214575099918	0.00556880958960238	0.0381205110051132
miRBase-miRNA_Match_Genome-rno-mir-190b	252.710077247485	-1.00818062445917	0.364907217403967	-2.76284100827493	0.00573006707656677	0.0390232260393881
GtRNAdb-mature-tRNA_Match_Genome-mature-tRNA-Leu-AAG	77324.3314536759	0.853477766071895	0.309278483371365	2.75957692487481	0.00578762595385512	0.0392141187077531
GtRNAdb-mature-tRNA_CCA_end_Match_Genome-mature-tRNA-Leu-AAG_CCA_end	1703.83867193432	-0.894285402398234	0.325629626858086	-2.74632689607195	0.00602666804867337	0.0406264729372499
GtRNAdb-mature-tRNA_Match_Genome-mature-tRNA-Cys-GCA	36682.0525241889	0.792046622490346	0.289153240964831	2.73919330749151	0.00615901483989193	0.0413089480170529
GtRNAdb-mature-tRNA_CCA_end_Unmatch_Genome-mature-tRNA-Asn-GTT_CCA_end	163.302821268602	-1.28424183980108	0.469319308105376	-2.73639251064594	0.00621168847286938	0.0414528758390479
GtRNAdb-mature-tRNA_CCA_end_Unmatch_Genome-mature-tRNA-Ile-TAT_CCA_end	190.171906689732	-1.16027774894088	0.427369126436502	-2.71493113837101	0.00662895526038656	0.0440162629289667
GtRNAdb-mature-tRNA_5_end_Match_Genome-mature-tRNA-Ala-CGC_5_end	25992.3391575653	0.796455186104773	0.293832241501945	2.71057792035903	0.00671660649733502	0.044324636573737
GtRNAdb-mature-tRNA_Unmatch_Genome-mature-tRNA-Val-CAC	5187.13057091899	0.74728610321092	0.275820655748319	2.70931885497656	0.00674215104510156	0.044324636573737
piRNAdb-piRNA_Match_Genome-rno-piR-7987	45.8900077204751	1.52607070347864	0.563674566521996	2.70736129340525	0.00678204048248284	0.0443672402006759
rRNAdb-rRNA_Match_Genome-4.5S-rRNA	600.890825971047	0.853961902073162	0.316714036555832	2.6963184561055	0.00701106031190927	0.0456406279128211
miRBase-miRNA_Match_Genome-rno-mir-338	41.9737524474663	-1.57424129792147	0.58518062728529	-2.69018013331119	0.00714134596961756	0.0462619875495225
GtRNAdb-mature-tRNA_5_end_Match_Genome-mature-tRNA-Cys-GCA_5_end	23693.5022370998	0.803618776378655	0.300563061800797	2.67371103941996	0.0075017059128308	0.0483605119040743
GtRNAdb-mature-tRNA_CCA_end_Unmatch_Genome-mature-tRNA-Val-AAC_CCA_end	7018.88681477637	0.734630916197765	0.275023861734587	2.6711533739815	0.0075591098880169	0.04840430175819
miRBase-miRNA_Match_Genome-rno-mir-34a	113.900913976755	-1.24031536665864	0.464508873495147	-2.67016506557996	0.00758139666092132	0.04840430175819
GtRNAdb-mature-tRNA_5_end_Match_Genome-mature-tRNA-Ala-AGC_5_end	14151.3857358767	0.778040712651879	0.291824298830386	2.66612724084396	0.007673064559781	0.0487551661980343
miRBase-miRNA_Match_Genome-rno-mir-494	23.9575687202856	-2.1607426546488	0.811261068722014	-2.66343688604784	0.00773469199343162	0.0489127188917962
piRNAdb-piRNA_Match_Genome-rno-piR-43507	20.0299048556432	2.1585838744836	0.817116440860531	2.64170902278055	0.00824888900121558	0.0519171781687881
piRNAdb-piRNA_Match_Genome-rno-piR-15795	12.2702434229822	-3.28067226445584	1.24271785942691	-2.63991721014514	0.00829262823599771	0.0519462749877592
miRBase-miRNA_Match_Genome-rno-mir-421	28.9747028222784	-1.88743737270122	0.716400628729219	-2.634611552546	0.00842336200079477	0.0525174870284294
miRBase-miRNA_Match_Genome-rno-mir-376b	22.2112489266326	-2.28767249190609	0.869195421201829	-2.63194264040525	0.00848981949149159	0.0526844873116861
GtRNAdb-mature-tRNA_CCA_end_Unmatch_Genome-mature-tRNA-Ser-GCT_CCA_end	3736.27710843241	0.889091813008676	0.338109787253778	2.62959502068878	0.0085486637868871	0.0527199169109597
GtRNAdb-mature-tRNA_Unmatch_Genome-mature-tRNA-Asn-GTT	166.025163139644	-1.20394612292007	0.458026379483492	-2.62855192811763	0.00857492624455369	0.0527199169109597
GtRNAdb-mature-tRNA_Unmatch_Genome-mature-tRNA-Glu-CTC	5345.04663764256	0.813400953853186	0.310864988058548	2.6165730625798	0.0088817354088279	0.0543545835157763
GtRNAdb-mature-tRNA_5_end_Match_Genome-mature-tRNA-Val-CAC_5_end	52807.8323428059	-0.758873300320126	0.29029662417997	-2.61413064124941	0.00894548244037916	0.054493581104695
miRBase-miRNA_Match_Genome-rno-mir-674	78.5158554857978	-1.16047146791252	0.446198030429103	-2.60079917160662	0.00930068834271703	0.0563986946078914
piRNAdb-piRNA_Match_Genome-rno-piR-5587	47.6849744058925	-1.36588199360947	0.527452485210706	-2.5895830087213	0.0096092252414443	0.0577916909469854
miRBase-miRNA_Match_Genome-rno-mir-20b	15.6316304439933	-2.55680910993345	0.98745617201404	-2.58928870201755	0.0096174425446414	0.0577916909469854
GtRNAdb-mature-tRNA_Unmatch_Genome-mature-tRNA-Val-AAC	7239.31679440457	0.709270307955829	0.27457928260983	2.58311661831997	0.00979122206145538	0.0585369909712784
miRBase-miRNA_Match_Genome-rno-mir-145	3071.51865068654	-0.799147847489772	0.309535391676437	-2.58176566873857	0.00982963026099028	0.0585369909712784
GtRNAdb-mature-tRNA_Match_Genome-mature-tRNA-iMet-CAT	31327.3956916925	0.735943710133436	0.286158042527228	2.57180858393456	0.0101168810361578	0.0599786518572212
miRBase-miRNA_Match_Genome-rno-mir-30e	10004.4727036434	-0.834295361119633	0.326308944238251	-2.55676522464699	0.0105650496292175	0.0623572707004479
piRNAdb-piRNA_Match_Genome-rno-piR-27752	261.594915927952	0.869913639270984	0.340921548557088	2.55165343156745	0.0107213106053849	0.0624469319471544
GtRNAdb-mature-tRNA_5_end_Match_Genome-mature-tRNA-Val-AAC_5_end	46364.1247991579	-0.729519869951481	0.285711827211987	-2.55334151571613	0.0106694822629566	0.0624469319471544
GtRNAdb-mature-tRNA_3_end_Match_Genome-mature-tRNA-Leu-AAG_3_end	101.482860518746	1.23745421862868	0.48490495885906	2.55195208054853	0.0107121250799542	0.0624469319471544
GtRNAdb-mature-tRNA_5_end_Match_Genome-mature-tRNA-Met-CAT_5_end	707.216710931177	0.957381149560704	0.376248146107638	2.544547154491	0.0109419536958925	0.0634537751447391
piRNAdb-piRNA_Match_Genome-rno-piR-30766	96.2431042923847	1.26652676137841	0.50008088033585	2.53264384058799	0.0113205912246435	0.0653536488174082
GtRNAdb-mature-tRNA_CCA_end_Unmatch_Genome-mature-tRNA-Lys-TTT_CCA_end	886.888405329332	1.02033444174788	0.403106443315621	2.53117869651362	0.0113679916241124	0.0653536488174082
GtRNAdb-mature-tRNA_5_end_Match_Genome-mature-tRNA-Asn-GTT_5_end	4518.8804736939	1.0868675404862	0.432129818605926	2.51514126933543	0.0118984696169557	0.0679041848681019
miRBase-miRNA_Match_Genome-rno-mir-374	699.29812417636	-0.95062659796538	0.37803024243884	-2.51468398885885	0.0119139119535149	0.0679041848681019
piRNAdb-piRNA_Match_Genome-rno-piR-9111	28.2639713395613	1.67082499676549	0.665900442641853	2.50912131870158	0.0121031908439415	0.0686881941912577
piRNAdb-piRNA_Match_Genome-rno-piR-38458	28.6361177428201	1.65234265880835	0.66172737476176	2.49701421133323	0.01252439373002	0.0704762494638412
GtRNAdb-mature-tRNA_CCA_end_Unmatch_Genome-mature-tRNA-Gln-CTG_CCA_end	408.90634844218	0.986456565495931	0.395001604782093	2.49734824758528	0.012512600788792	0.0704762494638412
GtRNAdb-mature-tRNA_5_end_Match_Genome-mature-tRNA-Gln-TTG_5_end	1228.08221615989	0.922603416161244	0.370106458490575	2.49280550229776	0.0126738249386188	0.07101620049994
GtRNAdb-mature-tRNA_CCA_end_Unmatch_Genome-mature-tRNA-Gly-CCC_CCA_end	5218.09915740673	0.686760417694686	0.276441651234933	2.4842870624841	0.0129811117438946	0.0724324218314789
GtRNAdb-mature-tRNA_Unmatch_Genome-mature-tRNA-Ser-TGA	7689.31187936982	0.760970889403516	0.306625197434965	2.48176241146952	0.0130734411069381	0.0724818763569544
GtRNAdb-mature-tRNA_Unmatch_Genome-mature-tRNA-Lys-TTT	905.39727360567	0.996236958928975	0.401536395561609	2.48106266316304	0.0130991342813773	0.0724818763569544
miRBase-miRNA_Match_Genome-rno-let-7i	10384.3551634691	-0.903894311391837	0.364825218529277	-2.47760918237975	0.0132265934185254	0.0728834691278082
GtRNAdb-mature-tRNA_CCA_end_Unmatch_Genome-mature-tRNA-Ala-AGC_CCA_end	1527.4015605615	-0.734917962432369	0.297134082447467	-2.4733546430585	0.0133851242242603	0.0734522519413956
miRBase-miRNA_Match_Genome-rno-mir-28	681.648918656539	-0.819370917893823	0.331640777270361	-2.47065793488312	0.0134864752266769	0.0737038646132793
GtRNAdb-mature-tRNA_Unmatch_Genome-mature-tRNA-Ser-GCT	4034.19425634752	0.812849454868686	0.329686340995436	2.46552360165852	0.0136813161571172	0.0744622453141463
miRBase-miRNA_Match_Genome-rno-mir-676	194.18881151574	-1.03836305399812	0.421551008757952	-2.46319670081572	0.0137704346500184	0.0746413763886712
piRNAdb-piRNA_Match_Genome-rno-piR-35163	16.3986922397981	-2.43724385202921	0.992119524671206	-2.45660305177133	0.0140257568547408	0.0757162809068933
GtRNAdb-mature-tRNA_Match_Genome-mature-tRNA-Gln-TTG	12069.4046246701	0.781149314000859	0.319171909176109	2.44742501311369	0.0143881061458472	0.0773579148246358
miRBase-miRNA_Match_Genome-rno-mir-125b-2	8579.17321767148	-0.820609892622883	0.337108973376446	-2.43425704277091	0.0149223939613399	0.0799070128252393
GtRNAdb-mature-tRNA_Unmatch_Genome-mature-tRNA-Gly-CCC	5561.28222245971	0.66153756741308	0.272298618862674	2.42945619840513	0.0151214919573521	0.0806479571058781
GtRNAdb-mature-tRNA_CCA_end_Unmatch_Genome-mature-tRNA-Ser-TGA_CCA_end	7256.25044144662	0.751105598256555	0.31116647278814	2.41383845607284	0.0157854593696671	0.0838523601716716
miRBase-miRNA_Match_Genome-rno-mir-487b	36.1113054378513	-1.73885565557722	0.724443934116247	-2.40026256510582	0.0163833155094484	0.0866814462013844
GtRNAdb-mature-tRNA_Match_Genome-mature-tRNA-Met-CAT	11946.0484957668	0.656954628059898	0.273916037141689	2.39837957249679	0.0164677905538355	0.0867826422837047
miRBase-miRNA_Match_Genome-rno-mir-450b-1	38.3151918614034	-1.37166224693226	0.577154367202852	-2.37659511021279	0.017473256089819	0.0913562365640932
miRBase-miRNA_Match_Genome-rno-mir-450b-2	38.3151918614034	-1.37166224693226	0.577154367202852	-2.37659511021279	0.017473256089819	0.0913562365640932
miRBase-miRNA_Match_Genome-rno-mir-423	1284.19722122009	-0.772938042656048	0.326387379619548	-2.36816154949686	0.0178767281497873	0.0929356271639426
miRBase-miRNA_Match_Genome-rno-mir-185	189.576466881789	-1.0695937084067	0.451807873597756	-2.36736402995704	0.0179153016219648	0.0929356271639426
piRNAdb-piRNA_Match_Genome-rno-piR-31016	12.3102264071505	2.44901734914609	1.0375908843511	2.36029188968607	0.0182605607859166	0.0943580728548531
piRNAdb-piRNA_Match_Genome-rno-piR-12908	20.0252787680947	1.94675109915473	0.827432661093286	2.35276076313267	0.0186346188969426	0.0959177282757354
miRBase-miRNA_Match_Genome-rno-let-7b	9300.53012346782	-0.979330076480333	0.41655877038926	-2.35100097776163	0.0187229846556787	0.0960004773078817
miRBase-miRNA_Match_Genome-rno-mir-25	7208.03354848233	-0.827487366602616	0.352658304267059	-2.34642813338087	0.0189543211286751	0.0965907009366592
GtRNAdb-mature-tRNA_Match_Genome-mature-tRNA-Ala-AGC	15792.3335803461	0.679858987139325	0.289813054185242	2.34585356774431	0.0189835639642079	0.0965907009366592
GtRNAdb-mature-tRNA_CCA_end_Unmatch_Genome-mature-tRNA-Glu-TTC_CCA_end	43307.2872987442	0.651770611743281	0.278196067915209	2.34284624016301	0.0191372680483155	0.0969002951654596
GtRNAdb-mature-tRNA_Match_Genome-mature-tRNA-Ser-AGA	161343.165769618	0.687879837980227	0.293900767582215	2.34051732371812	0.0192570449991272	0.0969002951654596
miRBase-miRNA_Match_Genome-rno-mir-200a	4599.17645766318	-0.917829047752329	0.39216829826911	-2.34039582445419	0.0192633116895191	0.0969002951654596
GtRNAdb-mature-tRNA_5_end_Match_Genome-mature-tRNA-Ser-AGA_5_end	157597.41795721	0.686248378737016	0.293765015942318	2.3360452793731	0.0194888817765608	0.0976650377331049
miRBase-miRNA_Match_Genome-rno-mir-874	54.7764025412501	-1.3346773324598	0.572518970990984	-2.33123686739948	0.0197408731257329	0.0985559380111777
piRNAdb-piRNA_Match_Genome-rno-piR-29310	19.9071749171661	1.85017728180434	0.79427950185143	2.32937810618511	0.0198390438772249	0.0986750946402797
GtRNAdb-mature-tRNA_Unmatch_Genome-mature-tRNA-Glu-TTC	44059.162761795	0.643674847736387	0.278518608309055	2.31106586250833	0.0208292172311627	0.103213434638
piRNAdb-piRNA_Match_Genome-rno-piR-24633	16.9357367255956	-1.98621487493031	0.863256994362655	-2.30083843849622	0.0214007648622559	0.10542016294972
GtRNAdb-mature-tRNA_Unmatch_Genome-mature-tRNA-Gln-CTG	436.453061973087	0.885924055023819	0.385140307349253	2.30026314597201	0.0214333162623677	0.10542016294972
GtRNAdb-mature-tRNA_5_end_Match_Genome-mature-tRNA-Leu-CAG_5_end	23117.488304377	0.632083963040741	0.275050277586334	2.29806698828849	0.0215579767708954	0.105642041150366
GtRNAdb-mature-tRNA_3_end_Match_Genome-mature-tRNA-Asn-GTT_3_end	47.3880219913076	1.77095454764478	0.772327574092141	2.29300960764803	0.0218474518257345	0.106666970678586
piRNAdb-piRNA_Match_Genome-rno-piR-39125	14.2184992478426	-2.61692553537697	1.14446015385182	-2.28660257551946	0.0222190307810481	0.108083783433084
miRBase-miRNA_Match_Genome-rno-mir-125b-1	8227.52829774855	-0.779927673937932	0.342432150130157	-2.27761229090635	0.0227496875553183	0.1102612593922
GtRNAdb-mature-tRNA_Match_Genome-mature-tRNA-Ser-TGA	65275.292831606	0.654628372342188	0.289271441363356	2.26302454627695	0.0236341761930976	0.11413158539794
GtRNAdb-mature-tRNA_5_end_Match_Genome-mature-tRNA-Ser-TGA_5_end	62518.0612115827	0.648508452561264	0.289727699695583	2.23833776764408	0.0251990369809798	0.121247540256309
piRNAdb-piRNA_Match_Genome-rno-piR-35877	18.6006702907116	1.81195521953445	0.814869406977143	2.22361424299399	0.0261744094459168	0.125485977415803
miRBase-miRNA_Match_Genome-rno-mir-34b	37879.8593516415	0.758284212098804	0.342445427531824	2.2143213228576	0.0268066828290852	0.127837959150555
GtRNAdb-mature-tRNA_Unmatch_Genome-mature-tRNA-Phe-GAA	214.451981594609	-0.808481432618321	0.365236664937332	-2.21358234326513	0.0268575230444313	0.127837959150555
piRNAdb-piRNA_Match_Genome-rno-piR-37511	27.8067726918259	1.8532444184895	0.845994317995052	2.19061095218885	0.0284799579166021	0.135076371833027
miRBase-miRNA_Match_Genome-rno-mir-541	44.4794132340715	-1.48763347882339	0.679909831870596	-2.18798641980298	0.0286705915408265	0.135496603438497
piRNAdb-piRNA_Match_Genome-rno-piR-24296	14.7409217366431	2.00955102598402	0.924069332317576	2.17467559597941	0.0296544349163099	0.139649253790282
piRNAdb-piRNA_Match_Genome-rno-piR-37990	20.5640231492597	-1.76681532280326	0.813447603385882	-2.17200876300956	0.0298550019512826	0.140096970287291
miRBase-miRNA_Match_Genome-rno-mir-429	4828.74792028718	-0.814972022043961	0.376903036661886	-2.16228563521779	0.0305961662689899	0.142901553728613
GtRNAdb-mature-tRNA_CCA_end_Match_Genome-mature-tRNA-Pro-AGG_CCA_end	1510.71371992088	-0.662370081289944	0.306460478604615	-2.16135563158378	0.0306678786239871	0.142901553728613
miRBase-miRNA_Match_Genome-rno-let-7d	10113.439211337	-0.81240623233489	0.378042307833388	-2.14898231097704	0.0316358021863784	0.146896312250037
GtRNAdb-mature-tRNA_CCA_end_Match_Genome-mature-tRNA-Pro-TGG_CCA_end	1292.74177448147	-0.660733370803722	0.308041420949881	-2.14494975632262	0.0319568643888589	0.147870090273187
piRNAdb-piRNA_Match_Genome-rno-piR-42506	40.7972821634145	1.54546941289898	0.723548592197856	2.13595801244592	0.032682836344502	0.150704189810759
piRNAdb-piRNA_Match_Genome-rno-piR-9779	80.5815556699225	1.15882908104987	0.543495031387248	2.13217971485777	0.0329920753992415	0.151440485687856
miRBase-miRNA_Match_Genome-rno-mir-202	108.588986191167	-1.11556224638702	0.523437039312815	-2.13122527181409	0.0330705879890649	0.151440485687856
GtRNAdb-mature-tRNA_CCA_end_Match_Genome-mature-tRNA-Thr-TGT_CCA_end	2535.04950909788	-0.608075498450978	0.286623813999778	-2.12151073550172	0.0338788454781038	0.154608614415539
piRNAdb-piRNA_Match_Genome-rno-piR-3159	29.459470432688	-1.31080674842625	0.620365506182946	-2.11295878858825	0.0346042953580957	0.157378439162846
GtRNAdb-mature-tRNA_Match_Genome-mature-tRNA-Glu-TTC	47189.795814708	0.617834639018697	0.294674872190362	2.09666550264785	0.0360231963500382	0.163272371170139
piRNAdb-piRNA_Match_Genome-rno-piR-23474	19.5270902832875	1.77270050970789	0.847322635139073	2.09211985634838	0.0364277953332231	0.1645445993283
GtRNAdb-mature-tRNA_Unmatch_Genome-mature-tRNA-Thr-CGT	1258.37804779933	0.787646366838314	0.378888821287123	2.07883242414648	0.0376327555616214	0.169411184358757
GtRNAdb-mature-tRNA_CCA_end_Match_Genome-mature-tRNA-Pro-CGG_CCA_end	646.101552124994	-0.659891436415087	0.318327731318171	-2.07299387232939	0.0381728498416374	0.171261974965184
piRNAdb-piRNA_Match_Genome-rno-piR-20682	19.8178899898993	1.78401613679582	0.864297353854267	2.0641231039759	0.0390060459045407	0.174410871923334
piRNAdb-piRNA_Match_Genome-rno-piR-53448	50.5745817407996	-1.44255868804374	0.708771399498499	-2.03529472135084	0.0418212269983273	0.186371105549593
piRNAdb-piRNA_Match_Genome-rno-piR-58514	14.4330770061575	1.90148848405467	0.945842411211435	2.01036500532815	0.0443925714273402	0.197168343998354
GtRNAdb-mature-tRNA_Match_Genome-mature-tRNA-Gln-CTG	10123.4748882216	-0.670325563510195	0.333711394202408	-2.00869845967446	0.0445691221824351	0.197292647527579
miRBase-miRNA_Match_Genome-rno-mir-1949	13.1673033480353	2.41134890337257	1.20770990790561	1.99662922990696	0.0458654751363039	0.202356647777447
miRBase-miRNA_Match_Genome-rno-mir-125a	6351.63275513049	-0.779021897328691	0.393775648376603	-1.97833944414877	0.047890426169061	0.210591013087791
GtRNAdb-mature-tRNA_Unmatch_Genome-mature-tRNA-Arg-TCG	1684.0702674578	-0.62573363687966	0.316618690841522	-1.97630037322358	0.0481207673707119	0.210905541479556
GtRNAdb-mature-tRNA_CCA_end_Unmatch_Genome-mature-tRNA-Thr-CGT_CCA_end	1099.06031149099	0.7521008561338	0.381706787052097	1.97036280633687	0.0487968050616564	0.213164990532499
piRNAdb-piRNA_Match_Genome-rno-piR-27404	21.9932368910784	1.46907629090715	0.746348577389104	1.9683514317751	0.0490276160239098	0.213237008438384
miRBase-miRNA_Match_Genome-rno-mir-29a	9810.48866276806	-0.635456998887495	0.322989466039365	-1.96742329302482	0.0491344311612541	0.213237008438384
piRNAdb-piRNA_Match_Genome-rno-piR-1639	37.1351336355449	-1.29802049817484	0.661659726466802	-1.96176440283912	0.0497899198459564	0.215377894317362
piRNAdb-piRNA_Match_Genome-rno-piR-30373	22.1812540880959	-1.82836390124702	0.933519954824954	-1.95856970362231	0.050163200529064	0.216288085398042
GtRNAdb-mature-tRNA_Unmatch_Genome-mature-tRNA-iMet-CAT	2963.16857818532	0.79361547072048	0.406270409166128	1.9534168691965	0.0507702189400259	0.218196928001147
miRBase-miRNA_Match_Genome-rno-let-7g	38220.8780400673	-0.669489154716787	0.344937413513734	-1.94090037348219	0.0522703627121701	0.223919489296006
GtRNAdb-mature-tRNA_5_end_Match_Genome-mature-tRNA-Trp-CCA_5_end	492.352747039104	-0.894395137401236	0.462125535669184	-1.93539432116882	0.0529419256548874	0.226067129484535
piRNAdb-piRNA_Match_Genome-rno-piR-18980	18.88210962691	1.73601614074301	0.897789284571667	1.93365656126232	0.0531553680115045	0.226251053587429
GtRNAdb-mature-tRNA_3_end_Match_Genome-mature-tRNA-Leu-TAG_3_end	35.3337279918117	1.19087506872479	0.616902583949646	1.93041024581281	0.0535560264281499	0.227228124909211
rRNAdb-rRNA_Match_Genome-5.8S-rRNA	141377.713778021	0.607102604167397	0.314977563828791	1.92744713873459	0.0539239298187389	0.22806044203594
piRNAdb-piRNA_Match_Genome-rno-piR-17871	21.2816070195911	1.62511085312339	0.845830019019808	1.92132085239379	0.0546912698440877	0.230571448739519
GtRNAdb-mature-tRNA_CCA_end_Unmatch_Genome-mature-tRNA-Arg-ACG_CCA_end	625.791831973088	0.581340474199794	0.304305534721621	1.91038416285003	0.0560837684490783	0.235240413965553
miRBase-miRNA_Match_Genome-rno-mir-1306	29.3922074867795	1.41067071734287	0.738630538478881	1.90984618676608	0.0561530205023195	0.235240413965553
piRNAdb-piRNA_Match_Genome-rno-piR-32326	18.8813185757729	-1.55631073744552	0.815691744972166	-1.90796431009441	0.0563958292777812	0.235321802155033
piRNAdb-piRNA_Match_Genome-rno-piR-31739	30.7143513481413	-1.34201706096128	0.703749913849897	-1.90695165221365	0.0565268485598309	0.235321802155033
GtRNAdb-mature-tRNA_Unmatch_Genome-mature-tRNA-Arg-TCT	648.672099873204	-0.590441138006161	0.310559688599333	-1.90121628685658	0.0572736886542123	0.237685807914981
miRBase-miRNA_Match_Genome-rno-mir-1839	832.079929026335	-0.718512862470373	0.378324461498156	-1.89919747622207	0.0575385164576892	0.238040965282901
piRNAdb-piRNA_Match_Genome-rno-piR-61300	16.1132213944077	-1.81026961159454	0.954394356192772	-1.89677317332008	0.0578578813899024	0.23833892878827
piRNAdb-piRNA_Match_Genome-rno-piR-28376	16.7581473653127	1.60213561392827	0.845040047531321	1.89592862327497	0.0579694834326892	0.23833892878827
miRBase-miRNA_Match_Genome-rno-mir-3559	85.0770829811835	0.873643893514799	0.461428918950369	1.89334447329854	0.0583120744774463	0.239007515142126
GtRNAdb-mature-tRNA_CCA_end_Unmatch_Genome-mature-tRNA-iMet-CAT_CCA_end	2752.80170561591	0.785525269371061	0.415885188582444	1.88880318639994	0.0589182056716929	0.240748852713871
miRBase-miRNA_Match_Genome-rno-mir-384	46.2273325471255	1.08100993206415	0.573150478249844	1.88608397460487	0.0592836394706192	0.241498997598105
piRNAdb-piRNA_Match_Genome-rno-piR-6488	13.5869151557703	-1.69352009745806	0.899097527741306	-1.88357774902627	0.0596221139761089	0.242028953599171
piRNAdb-piRNA_Match_Genome-rno-piR-22923	255.908481783481	0.617479629665918	0.328246331199151	1.88114708673251	0.0599519132423921	0.242028953599171
piRNAdb-piRNA_Match_Genome-rno-piR-30263	13.6166472529985	1.75962361394741	0.935430616905175	1.88108405064722	0.0599604862455776	0.242028953599171
miRBase-miRNA_Match_Genome-rno-mir-182	6688.89558289416	-0.711223096632945	0.381013283847341	-1.86666220518943	0.0619487748368157	0.249296887828155
piRNAdb-piRNA_Match_Genome-rno-piR-6256	14.7429207724107	2.01769665236529	1.0820360368697	1.86472223069616	0.0622203490411519	0.249633303705891
piRNAdb-piRNA_Match_Genome-rno-piR-25199	29.2947485443593	1.2810116645658	0.689640337517985	1.85750686970567	0.0632390747401862	0.252956298960745
GtRNAdb-mature-tRNA_Match_Genome-mature-tRNA-Val-TAC	15080.4536558469	0.558882044041691	0.301304712211048	1.85487322763882	0.0636143319145393	0.253693191539064
GtRNAdb-mature-tRNA_5_end_Match_Genome-mature-tRNA-Glu-TTC_5_end	23750.1949075857	0.705701616227982	0.38089554583397	1.85274315739988	0.0639191810251407	0.254145725752655
piRNAdb-piRNA_Match_Genome-rno-piR-27725	22.612425817366	1.42314097974886	0.769555612282538	1.84930232076114	0.0644141708387026	0.255349310071036
miRBase-miRNA_Match_Genome-rno-mir-7b	411.302592524523	-0.644620015195076	0.350113737571706	-1.84117315608918	0.0655961878199298	0.259261123288294
miRBase-miRNA_Match_Genome-rno-mir-3473	99.9023769995504	-1.13401412202034	0.618171702374268	-1.83446462797444	0.0665850538027833	0.262388579970612
miRBase-miRNA_Match_Genome-rno-let-7c-1	29363.5101908526	-0.725974493752811	0.396561330819219	-1.83067393952176	0.067149225087005	0.26382890803415
piRNAdb-piRNA_Match_Genome-rno-piR-42242	13.0312525914708	-1.60577387464418	0.878130813282314	-1.82862718214163	0.0674554777703572	0.264250367194792
GtRNAdb-mature-tRNA_Unmatch_Genome-mature-tRNA-Gly-GCC	1884.65150787183	0.508582779457741	0.278403210259073	1.82678489585113	0.0677321177433518	0.264553683421092
GtRNAdb-mature-tRNA_5_end_Match_Genome-mature-tRNA-Val-TAC_5_end	12695.7244439172	0.583085444681347	0.319651274823648	1.8241298896838	0.0681324377494672	0.265336883669479
piRNAdb-piRNA_Match_Genome-rno-piR-39888	14.6049555791648	1.57538869533189	0.864854974763712	1.82156400934423	0.0685211660700289	0.265434448640317
piRNAdb-piRNA_Match_Genome-rno-piR-45837	14.0750070456806	-2.3239186738876	1.27594842389611	-1.82132649750177	0.0685572408762264	0.265434448640317
GtRNAdb-mature-tRNA_CCA_end_Unmatch_Genome-mature-tRNA-Val-TAC_CCA_end	1116.66837261048	-0.704210849497318	0.388152732610066	-1.8142622486823	0.0696373606468563	0.268832601566934
piRNAdb-piRNA_Match_Genome-rno-piR-21785	19.3484260767358	-1.54856955740435	0.855630867070217	-1.80985705051389	0.0703179580397356	0.269900072323738
miRBase-miRNA_Match_Genome-rno-mir-465	1134.66340519579	0.664806676252458	0.367328646626803	1.80984162917162	0.0703203501686846	0.269900072323738
miRBase-miRNA_Match_Genome-rno-mir-1249	37.4639977891516	-1.05195568860251	0.581736994597359	-1.80830117109985	0.0705596397144085	0.270038044785978
piRNAdb-piRNA_Match_Genome-rno-piR-54620	14.6928779147392	-1.68137447509583	0.932278144702083	-1.80351162863861	0.071307900837782	0.271337800322563
miRBase-miRNA_Match_Genome-rno-let-7c-2	29486.887537032	-0.717010811820329	0.397506179744092	-1.80377274205379	0.0712669406345982	0.271337800322563
piRNAdb-piRNA_Match_Genome-rno-piR-18540	13.4805728965821	-1.60383424861882	0.89772544845772	-1.78655317321591	0.074009735829302	0.280713125152604
piRNAdb-piRNA_Match_Genome-rno-piR-35422	18.0031731336652	1.66299261832877	0.931433521957161	1.785412033308	0.0741945082293403	0.280713125152604
piRNAdb-piRNA_Match_Genome-rno-piR-47325	44.1713023544306	0.994236515851511	0.559270695672862	1.77773754917615	0.075446969574348	0.284556684799964
miRBase-miRNA_Match_Genome-rno-mir-203b	16.3565125919174	-1.45300994068542	0.818138363911471	-1.77599536310541	0.0757336814187282	0.284556684799964
miRBase-miRNA_Match_Genome-rno-mir-151	3903.10074900054	-0.494790996119448	0.278712996287903	-1.77527062860155	0.0758532126650506	0.284556684799964
GtRNAdb-mature-tRNA_CCA_end_Unmatch_Genome-mature-tRNA-Gln-TTG_CCA_end	681.887302084238	0.525165219666221	0.296073481148529	1.77376649076776	0.0761017830229186	0.284684979871651
piRNAdb-piRNA_Match_Genome-rno-piR-36102	17.9166015302938	-1.99828420209998	1.13025533143991	-1.76799360862491	0.0770619721551613	0.287467132084422
GtRNAdb-mature-tRNA_Unmatch_Genome-mature-tRNA-Gln-TTG	692.983199797227	0.524953022637805	0.297223251436083	1.76619096958737	0.0773638155605735	0.287784725670705
GtRNAdb-mature-tRNA_Match_Genome-mature-tRNA-Asn-GTT	9188.99380313317	0.572321441596057	0.324530214689002	1.76353823370349	0.0778097547212921	0.288635067792949
GtRNAdb-mature-tRNA_Match_Genome-mature-tRNA-Leu-CAA	29932.27840532	0.506918727586317	0.287993027786249	1.76017708304576	0.0783777863409727	0.289932312704211
piRNAdb-piRNA_Match_Genome-rno-piR-39667	16.7271605066523	1.40493869159981	0.800706702178822	1.75462336930214	0.0793237514444023	0.29261650532824
GtRNAdb-mature-tRNA_3_end_Match_Genome-mature-tRNA-Gly-GCC_3_end	53.4603815661977	-0.978054053157738	0.557994813187347	-1.7528013344263	0.0796361140302128	0.292955012277348
GtRNAdb-mature-tRNA_3_end_Match_Genome-mature-tRNA-Ser-AGA_3_end	66.7438606471016	1.01409291417076	0.581159388604716	1.74494800231216	0.0809939205565543	0.297126868782055
GtRNAdb-mature-tRNA_3_end_Match_Genome-mature-tRNA-Leu-CAA_3_end	92.7755914942749	0.838379852360837	0.482140492707227	1.73887044345378	0.0820575542084807	0.3001995371594
GtRNAdb-mature-tRNA_Unmatch_Genome-mature-tRNA-Gly-TCC	645.079205352533	0.560694998586465	0.32283975331619	1.73675946913923	0.0824296359225385	0.300732298091019
GtRNAdb-mature-tRNA_3_end_Match_Genome-mature-tRNA-Ser-GCT_3_end	86.0313786553381	1.02005926827605	0.58875932887749	1.73255729165406	0.0831743857768419	0.302618039209989
piRNAdb-piRNA_Match_Genome-rno-piR-10449	82.5207885034124	0.932997681596767	0.540559358695218	1.72598562320483	0.0843499992217189	0.305222885467146
GtRNAdb-mature-tRNA_CCA_end_Unmatch_Genome-mature-tRNA-Gly-GCC_CCA_end	1788.86760405123	0.479280787043954	0.277683960566504	1.72599377387939	0.08434853285295	0.305222885467146
piRNAdb-piRNA_Match_Genome-rno-piR-23287	27.4276628950726	-1.40886809084872	0.820784280332316	-1.71649009929661	0.0860723785292987	0.309970007030264
GtRNAdb-mature-tRNA_Unmatch_Genome-mature-tRNA-Val-TAC	1300.53188277106	-0.64966793247177	0.378554189631247	-1.71618212204867	0.0861287143028369	0.309970007030264
piRNAdb-piRNA_Match_Genome-rno-piR-3798	16.2171346794884	1.51596283020113	0.886067642501651	1.71088837633331	0.0871017207732079	0.311883860940093
GtRNAdb-mature-tRNA_5_end_Match_Genome-mature-tRNA-Tyr-GTA_5_end	596.224428234534	-0.721874215254774	0.421967507833126	-1.71073412491336	0.0871302051270893	0.311883860940093
piRNAdb-piRNA_Match_Genome-rno-piR-38979	79.3938735325999	0.797712259478725	0.469179485395511	1.70022834397004	0.089087982773444	0.318034519148209
GtRNAdb-mature-tRNA_CCA_end_Unmatch_Genome-mature-tRNA-Arg-TCG_CCA_end	1556.70977625303	-0.550543630797487	0.32479240378149	-1.69506313690721	0.0900634442612102	0.320654836404523
piRNAdb-piRNA_Match_Genome-rno-piR-15483	28.9956199268326	1.40360196041531	0.829187288903928	1.69274418360981	0.0905041711831518	0.321362404628945
GtRNAdb-mature-tRNA_3_end_Match_Genome-mature-tRNA-Val-AAC_3_end	207.353893309593	0.883513534544365	0.52273178619879	1.69018521136645	0.0909925267363306	0.322234868015592
piRNAdb-piRNA_Match_Genome-rno-piR-38457	84.8906440195438	0.730309803760958	0.433880712631956	1.68320412154493	0.0923355832331997	0.326121421632152
piRNAdb-piRNA_Match_Genome-rno-piR-41222	16.6190597180795	1.50684190225861	0.896068572023749	1.6816144983809	0.0926436173545139	0.326184530155379
GtRNAdb-mature-tRNA_CCA_end_Unmatch_Genome-mature-tRNA-Gly-TCC_CCA_end	606.791185923178	0.551986599264366	0.32845022920814	1.68057912638743	0.0928446930713353	0.326184530155379
GtRNAdb-mature-tRNA_Match_Genome-mature-tRNA-Tyr-GTA	791.115233524445	-0.700761143646421	0.419035329028088	-1.6723199575362	0.0944612462562558	0.330988219072052
piRNAdb-piRNA_Match_Genome-rno-piR-19243	16.1282327775772	1.48248167604727	0.887957259071955	1.66954170474003	0.0950100724591007	0.33203520059391
miRBase-miRNA_Match_Genome-rno-mir-1843b	45.1623518146613	-1.14300572143708	0.687512102871891	-1.66252450925954	0.0964076532951396	0.336035075002481
GtRNAdb-mature-tRNA_Match_Genome-mature-tRNA-Phe-GAA	4051.40759662526	-0.499671693544584	0.302196413290661	-1.65346665800426	0.0982359264170592	0.341511283460353
GtRNAdb-mature-tRNA_CCA_end_Unmatch_Genome-mature-tRNA-Arg-CCG_CCA_end	841.685815241686	-0.615661791466728	0.375448916649302	-1.6398017524227	0.101046393720088	0.350364519217433
piRNAdb-piRNA_Match_Genome-rno-piR-25265	13.2671547618177	1.77810994702078	1.08563657445828	1.63785007695419	0.101452972301631	0.350858195876475
miRBase-miRNA_Match_Genome-rno-mir-324	24.9450261193316	-1.35594297810523	0.830696172674688	-1.63229712945389	0.102616907668931	0.353961697102183
GtRNAdb-mature-tRNA_Match_Genome-mature-tRNA-Val-AAC	58897.9155017895	-0.463710072039268	0.284994877699132	-1.6270821278718	0.103719656249365	0.356838610101441
GtRNAdb-mature-tRNA_Unmatch_Genome-mature-tRNA-His-GTG	13824.1150651942	0.645947234964395	0.398370081175365	1.62147527007693	0.104915749477052	0.360020969781718
piRNAdb-piRNA_Match_Genome-rno-piR-32740	20.0098481367957	-1.43489441790462	0.885923220531573	-1.61966001641051	0.105305329628899	0.360426489039118
piRNAdb-piRNA_Match_Genome-rno-piR-6908	100.564413903927	0.701886500273943	0.433823118487789	1.61790939754562	0.105682124726493	0.360786276701241
GtRNAdb-mature-tRNA_Match_Genome-mature-tRNA-Thr-CGT	230.50473549687	0.646937591649931	0.402181553984349	1.60857101784212	0.10771017574871	0.366766957421249
GtRNAdb-mature-tRNA_3_end_Match_Genome-mature-tRNA-Val-CAC_3_end	154.70676526528	0.882141047932157	0.553791085982566	1.5929130501749	0.11117969826568	0.377612888227168
GtRNAdb-mature-tRNA_Unmatch_Genome-mature-tRNA-Arg-CCG	868.2168424129	-0.590465674103902	0.371761461914674	-1.58829178006467	0.112220375377412	0.380175149237761
piRNAdb-piRNA_Match_Genome-rno-piR-33395	19.2494831726457	1.51641781467349	0.957478417566221	1.58376187583217	0.11324791804499	0.381762158965612
GtRNAdb-mature-tRNA_3_end_Match_Genome-mature-tRNA-Glu-TTC_3_end	1879.34584990686	0.482387782820972	0.30459692396798	1.5836922334504	0.113263773066605	0.381762158965612
GtRNAdb-mature-tRNA_CCA_end_Unmatch_Genome-mature-tRNA-Tyr-GTA_CCA_end	1862.03526822048	-0.463018627710413	0.29327562351794	-1.57878320112783	0.114385793068502	0.384567932139166
piRNAdb-piRNA_Match_Genome-rno-piR-52660	33.1780807618229	1.0469560019924	0.665171217251018	1.57396467982965	0.115495615221769	0.386630355632101
miRBase-miRNA_Match_Genome-rno-mir-532	141.866960026384	-0.662891979796518	0.421260055112214	-1.57359325137044	0.115581514447247	0.386630355632101
piRNAdb-piRNA_Match_Genome-rno-piR-49154	26.5079898965589	1.3433015018448	0.857495579917457	1.56654043858057	0.117222149262827	0.388927729410052
piRNAdb-piRNA_Match_Genome-rno-piR-20299	29.093978202718	0.98785081911316	0.630644678280615	1.56641426326855	0.117251665936355	0.388927729410052
piRNAdb-piRNA_Match_Genome-rno-piR-5258	17.7948157346853	1.22403213770553	0.782251411342509	1.56475542256272	0.117640267721585	0.388927729410052
GtRNAdb-mature-tRNA_5_end_Unmatch_Genome-mature-tRNA-His-GTG_5_end	13415.5049850359	0.633448870175347	0.40410324831149	1.56754213885228	0.116988024624774	0.388927729410052
miRBase-miRNA_Match_Genome-rno-mir-16	14090.648172698	-0.437152303067612	0.279444512431079	-1.5643617377365	0.117732640981055	0.388927729410052
piRNAdb-piRNA_Match_Genome-rno-piR-12516	17.9315493243048	-1.38816437640759	0.890121252528046	-1.55952278688442	0.118872695594382	0.391719453472306
piRNAdb-piRNA_Match_Genome-rno-piR-2724	14.9124693787892	1.3816397381325	0.888941207909935	1.55425322376604	0.120124026392694	0.394863136261133
miRBase-miRNA_Match_Genome-rno-mir-29b-1	118.048209717146	-0.604809755892152	0.390215832970683	-1.54993648332458	0.121156761900071	0.397274518032826
piRNAdb-piRNA_Match_Genome-rno-piR-14416	69.3568321418547	-0.750284057010833	0.486738293312992	-1.54145270121242	0.123206646053962	0.403001049161729
piRNAdb-piRNA_Match_Genome-rno-piR-31932	24.6887927415229	1.12588519544339	0.73770610525783	1.52619747541589	0.126960692017168	0.413244605389212
miRBase-miRNA_Match_Genome-rno-mir-382	59.3085145749287	-0.864560820292394	0.566130552108858	-1.52714036907542	0.126726110486646	0.413244605389212
piRNAdb-piRNA_Match_Genome-rno-piR-39558	38.1770665361393	-0.875284222071576	0.57716831387494	-1.51651468216467	0.129389260645522	0.420119653147317
piRNAdb-piRNA_Match_Genome-rno-piR-15891	19.3726717536912	1.34538466413713	0.890029295186377	1.51161840561147	0.130630966617341	0.422087405517831
GtRNAdb-mature-tRNA_Match_Genome-mature-tRNA-Arg-CCT	8809.15786695935	0.436653595666654	0.288782639554872	1.51204932657901	0.130521314526688	0.422087405517831
GtRNAdb-mature-tRNA_Unmatch_Genome-mature-tRNA-Tyr-GTA	2023.84720442635	-0.439291845539074	0.293066725331704	-1.49894821748141	0.133887066204007	0.431558310482819
miRBase-miRNA_Match_Genome-rno-mir-652	289.791142978338	-0.52766098433353	0.353823376045463	-1.4913118240829	0.135879646007962	0.436920508228991
piRNAdb-piRNA_Match_Genome-rno-piR-931	30.0230293019186	1.0147684298738	0.687917753839451	1.47513045594493	0.140177473792303	0.448332031546171
piRNAdb-piRNA_Match_Genome-rno-piR-24518	12.6026220109138	1.56183876299714	1.05984205645464	1.47365237441301	0.140575211990475	0.448332031546171
piRNAdb-piRNA_Match_Genome-rno-piR-37946	33.3904968866927	0.872962356105642	0.592684132305674	1.47289645280298	0.140778958700869	0.448332031546171
GtRNAdb-mature-tRNA_Match_Genome-mature-tRNA-Gly-TCC	33727.4415069694	0.415856705514501	0.282329268247893	1.47294932649125	0.140764700053481	0.448332031546171
GtRNAdb-mature-tRNA_3_end_Match_Genome-mature-tRNA-Gly-TCC_3_end	25.5064484436055	-1.20765987365908	0.821592943881406	-1.46990049348987	0.1415887059119	0.449832060887568
miRBase-miRNA_Match_Genome-rno-mir-542-1	17.6785168339028	-1.15759923675248	0.790550930554456	-1.46429431933069	0.143113548639538	0.451436561979352
miRBase-miRNA_Match_Genome-rno-mir-542-2	17.6785168339028	-1.15759923675248	0.790550930554456	-1.46429431933069	0.143113548639538	0.451436561979352
miRBase-miRNA_Match_Genome-rno-mir-542-3	17.6785168339028	-1.15759923675248	0.790550930554456	-1.46429431933069	0.143113548639538	0.451436561979352
piRNAdb-piRNA_Match_Genome-rno-piR-32092	129.993167043289	0.603413422342575	0.413212833363075	1.46029690663644	0.144208491851576	0.453812505163254
piRNAdb-piRNA_Match_Genome-rno-piR-30836	59.6916997184794	0.841421523278162	0.576977227315888	1.45832709410816	0.144750405531519	0.45393722599328
miRBase-miRNA_Match_Genome-rno-mir-181c	184.857412432688	-0.601601828287216	0.412714940681443	-1.45766912943325	0.144931764925565	0.45393722599328
piRNAdb-piRNA_Match_Genome-rno-piR-10961	28.4583501145156	0.896182565392267	0.616481026830974	1.45370664527844	0.146027655022695	0.45629347263562
miRBase-miRNA_Match_Genome-rno-mir-141	439.409772124722	-0.638945122563327	0.440088413998256	-1.45185626851303	0.146541574389566	0.456733124252061
GtRNAdb-mature-tRNA_Match_Genome-mature-tRNA-Pro-AGG	4012.5207699271	0.384020607409517	0.264709284143541	1.4507258732991	0.146856207873216	0.456733124252061
piRNAdb-piRNA_Match_Genome-rno-piR-37402	39.0860265667707	-0.938467609887505	0.647555999810937	-1.44924548635408	0.147269038867374	0.45694692433615
piRNAdb-piRNA_Match_Genome-rno-piR-35907	13.368447683469	1.50641057534405	1.04480213227343	1.44181422377669	0.149354789168996	0.460969652857199
GtRNAdb-mature-tRNA_3_end_Match_Genome-mature-tRNA-Gly-CCC_3_end	116.388255789642	-0.669484565749547	0.463930501369115	-1.44307081292094	0.149000524314467	0.460969652857199
GtRNAdb-mature-tRNA_Match_Genome-mature-tRNA-His-GTG	8448.92223519522	0.490140234129268	0.340157490824948	1.44092147710927	0.149606867757118	0.460969652857199
piRNAdb-piRNA_Match_Genome-rno-piR-14141	13.0563838118496	-1.3054225548548	0.913069176977043	-1.42970827158654	0.152800765249046	0.469010219715837
miRBase-miRNA_Match_Genome-rno-mir-362	95.8894039798913	-0.687507935405834	0.481330062728489	-1.42835029149976	0.153191059142408	0.469010219715837
GtRNAdb-mature-tRNA_5_end_Match_Genome-mature-tRNA-Arg-CCG_5_end	403.428755242681	-0.605677463748504	0.424127445371712	-1.42805534128469	0.153275930238459	0.469010219715837
GtRNAdb-mature-tRNA_3_end_Match_Genome-mature-tRNA-Arg-ACG_3_end	96.3434983112998	0.649593095180001	0.455299234536077	1.42673882560312	0.153655190014726	0.469089867447257
piRNAdb-piRNA_Match_Genome-rno-piR-34284	15.187061535015	-1.26787208824288	0.889740060462188	-1.4249915729143	0.154159637093933	0.469353056557689
piRNAdb-piRNA_Match_Genome-rno-piR-41657	15.6047674848933	1.14074506766856	0.801340456957144	1.42354608177429	0.154577913437333	0.469353056557689
piRNAdb-piRNA_Match_Genome-rno-piR-35486	45.2768015595666	0.745166060733615	0.524190346253905	1.42155624585401	0.155155114328935	0.469353056557689
rRNAdb-rRNA_Match_Genome-28S-rRNA	987947.155935085	0.377317703361687	0.265391229345247	1.42174142036486	0.155101330941873	0.469353056557689
piRNAdb-piRNA_Match_Genome-rno-piR-61203	149.781500554302	0.712968565825094	0.502494072209204	1.41885965478268	0.15593993663662	0.470655081485073
piRNAdb-piRNA_Match_Genome-rno-piR-32960	22.0181303741144	1.32784736020177	0.938915633250904	1.41423501023647	0.157292911654665	0.471085360532949
piRNAdb-piRNA_Match_Genome-rno-piR-30086	24.7582011660848	-0.975335407754706	0.689745413238928	-1.41405131376618	0.157346836589558	0.471085360532949
piRNAdb-piRNA_Match_Genome-rno-piR-36081	810.227742311808	0.411413263731994	0.291498834260001	1.41137190059922	0.158134983876429	0.471085360532949
rRNAdb-rRNA_Unmatch_Genome-28S-rRNA	3614.51946115532	-0.459498855290609	0.324413733948432	-1.416397665099	0.156659107169421	0.471085360532949
miRBase-miRNA_Match_Genome-rno-let-7e	1975.66354399785	-0.573088462883504	0.405506087398384	-1.4132672250626	0.157577166935284	0.471085360532949
miRBase-miRNA_Match_Genome-rno-mir-450a	116.197726208487	-0.540153329560987	0.382784942997459	-1.41111435923062	0.158210896685011	0.471085360532949
GtRNAdb-mature-tRNA_CCA_end_Unmatch_Genome-mature-tRNA-Ala-TGC_CCA_end	2600.28339075058	-0.438749198240753	0.311585734077057	-1.4081170934875	0.159096400266588	0.472662236138766
piRNAdb-piRNA_Match_Genome-rno-piR-10847	16.9805496341539	1.27579358526802	0.907804428633609	1.40536171120942	0.159913746305843	0.47403003369232
piRNAdb-piRNA_Match_Genome-rno-piR-41893	25.359661886434	1.09988103743859	0.784326244868005	1.40232593851771	0.160817938138875	0.47564860099872
piRNAdb-piRNA_Match_Genome-rno-piR-3551	34.7489853316452	-0.854809457216338	0.612164078801523	-1.39637310782733	0.162602168890396	0.479857067303212
piRNAdb-piRNA_Match_Genome-rno-piR-36933	18.2917443942022	1.08756660025918	0.781292251639523	1.39200996551156	0.163919380239938	0.482671700573475
piRNAdb-piRNA_Match_Genome-rno-piR-36925	119.912445592112	0.531679826915673	0.382789990911655	1.38895958499181	0.164845039943676	0.484323480188499
piRNAdb-piRNA_Match_Genome-rno-piR-12401	14.6624292060078	1.25739758618903	0.908283766135518	1.38436646461148	0.166246272015492	0.486288654706109
miRBase-miRNA_Match_Genome-rno-mir-217	15.2096127203973	-1.21126432329065	0.874697269751762	-1.38478118679209	0.166119385238856	0.486288654706109
piRNAdb-piRNA_Match_Genome-rno-piR-17754	16.6786115736952	1.33237421901845	0.97135640468919	1.37166359596381	0.170168186113882	0.496666705844472
miRBase-miRNA_Match_Genome-rno-mir-1843a	189.073690172606	-0.630029557761352	0.460066105743936	-1.36943267477308	0.17086406637228	0.497604123119273
piRNAdb-piRNA_Match_Genome-rno-piR-5959	22.0780417594088	-1.0798280359888	0.789827196311291	-1.3671699848168	0.171572031048067	0.498572554117797
miRBase-miRNA_Match_Genome-rno-mir-106b	511.809411134312	-0.414525282177811	0.303740516156675	-1.36473489748069	0.172336387107817	0.49970026654843
piRNAdb-piRNA_Match_Genome-rno-piR-32934	16.7648628818493	-1.06279809664425	0.780818435265591	-1.36113345771958	0.173471518063505	0.501042574107638
piRNAdb-piRNA_Match_Genome-rno-piR-34650	25.1853738500564	1.22905280510197	0.903135724732978	1.36087275859379	0.173553903681862	0.501042574107638
piRNAdb-piRNA_Match_Genome-rno-piR-23198	74.5708238934921	0.637658741162757	0.471811465804154	1.351511752848	0.176531557647366	0.507432702501519
piRNAdb-piRNA_Match_Genome-rno-piR-33007	74.5708238934921	0.637658741162757	0.471811465804154	1.351511752848	0.176531557647366	0.507432702501519
miRBase-miRNA_Match_Genome-rno-mir-32	95.6913531296464	0.601136012481938	0.446461073428846	1.34644664061119	0.178158517876721	0.511003265097808
piRNAdb-piRNA_Match_Genome-rno-piR-20939	48.2097059900568	0.717991991938382	0.537198725263256	1.33654820492459	0.181370155523159	0.519093893393869
piRNAdb-piRNA_Match_Genome-rno-piR-11953	13.3057576413781	1.38976715434123	1.04198089894556	1.33377411788221	0.182277895722117	0.520569990363379
piRNAdb-piRNA_Match_Genome-rno-piR-45405	34.1989136980779	0.818329246232162	0.614987238449738	1.33064427205841	0.183306087845252	0.521650479473739
miRBase-miRNA_Match_Genome-rno-mir-190a-1	22.4586683018492	-1.1775740656987	0.886033341775672	-1.32904035342367	0.183834656922974	0.521650479473739
miRBase-miRNA_Match_Genome-rno-mir-190a-2	22.4586683018492	-1.1775740656987	0.886033341775672	-1.32904035342367	0.183834656922974	0.521650479473739
piRNAdb-piRNA_Match_Genome-rno-piR-37519	33.0827756841926	-0.776195301967867	0.586174521441704	-1.32417099954943	0.185446259931665	0.525101563303309
piRNAdb-piRNA_Match_Genome-rno-piR-2355	41.9518257459994	-0.787247667845569	0.597225947064768	-1.31817392012975	0.187445433776269	0.529633055435926
piRNAdb-piRNA_Match_Genome-rno-piR-45584	18.6163321224308	-0.995850896939757	0.756361206183956	-1.31663402194315	0.187961328999548	0.529963152678132
piRNAdb-piRNA_Match_Genome-rno-piR-58142	36.182049469501	0.8600564172754	0.65573859296591	1.31158426010182	0.189660446645378	0.531351258957473
piRNAdb-piRNA_Match_Genome-rno-piR-36362	19.4656789551248	-1.10476263484365	0.843716725428087	-1.30939994615268	0.190398909712412	0.531351258957473
piRNAdb-piRNA_Match_Genome-rno-piR-29590	16.2389192398566	-1.23464846342634	0.943239850869059	-1.30894433933086	0.190553205739116	0.531351258957473
piRNAdb-piRNA_Match_Genome-rno-piR-27566	20.6542574966564	-0.954491927443611	0.729702671961723	-1.30805595774724	0.190854330212888	0.531351258957473
miRBase-miRNA_Match_Genome-rno-mir-511	25.4316878841004	-1.0111716955613	0.771006925030841	-1.31149495903796	0.189690595712305	0.531351258957473
miRBase-miRNA_Match_Genome-rno-mir-200b	18770.5673990679	-0.492553002477925	0.375999079692422	-1.30998459592201	0.19020104674285	0.531351258957473
piRNAdb-piRNA_Match_Genome-rno-piR-46875	15.3215077839053	1.13118154782553	0.865628271571051	1.30677518858357	0.191289074077601	0.53144746940388
miRBase-miRNA_Match_Genome-rno-mir-98	1696.8320073254	-0.483350773496144	0.370593538502523	-1.3042612006924	0.192144539373944	0.532709704151562
piRNAdb-piRNA_Match_Genome-rno-piR-17997	21.5338680448955	-0.90219198995679	0.692635463585901	-1.30254951902979	0.192728601619082	0.533215797812793
piRNAdb-piRNA_Match_Genome-rno-piR-40412	13.8948015732799	-1.38496727758773	1.07117482666852	-1.29294233126738	0.196031005258223	0.541224896014387
piRNAdb-piRNA_Match_Genome-rno-piR-18830	57.4154571901173	0.65733729634988	0.509408673807633	1.29039282240041	0.196914302951509	0.541412410599594
GtRNAdb-mature-tRNA_Match_Genome-mature-tRNA-Pro-TGG	4259.2861180306	0.353178454206876	0.273602721628593	1.29084408263418	0.196757748349129	0.541412410599594
piRNAdb-piRNA_Match_Genome-rno-piR-49609	12.2962911408246	1.20547749614679	0.939091141498509	1.28366400541614	0.199259543937335	0.545601390409857
GtRNAdb-mature-tRNA_Match_Genome-mature-tRNA-Pro-CGG	1747.1164645422	0.350268532952372	0.272832013658087	1.28382490110317	0.199203228708907	0.545601390409857
GtRNAdb-mature-tRNA_CCA_end_Unmatch_Genome-mature-tRNA-Phe-GAA_CCA_end	177.672400265037	-0.489311933785442	0.384136904955982	-1.27379568969431	0.202735833146651	0.553586504076857
miRBase-miRNA_Match_Genome-rno-mir-130a	89.6695164129395	-0.551814975421219	0.433467833106982	-1.27302404763453	0.203009508648667	0.553586504076857
piRNAdb-piRNA_Match_Genome-rno-piR-24714	42.3863223875568	-0.7102679343314	0.558736031439764	-1.27120481652341	0.203655793525802	0.553938574146867
GtRNAdb-mature-tRNA_5_end_Match_Genome-mature-tRNA-Arg-CCT_5_end	164.257977793144	-0.772640701626845	0.608228205469025	-1.27031383069622	0.203972863522453	0.553938574146867
piRNAdb-piRNA_Match_Genome-rno-piR-15166	35.8595788865212	0.838118868124869	0.660383352255456	1.26913990981508	0.204391168227141	0.553941778378864
piRNAdb-piRNA_Match_Genome-rno-piR-33239	22.3107879417357	-1.05262605278648	0.832309688137728	-1.26470479412742	0.20597717076107	0.556804458951565
piRNAdb-piRNA_Match_Genome-rno-piR-57161	12.286729882519	1.25330223285475	0.991658887106329	1.26384409916589	0.206285989310369	0.556804458951565
piRNAdb-piRNA_Match_Genome-rno-piR-31145	15.6175937175393	1.24830725214992	0.990955527486626	1.25970057941553	0.207777396296936	0.559208313192845
piRNAdb-piRNA_Match_Genome-rno-piR-13274	14.9133256673999	1.13105103759714	0.898349677352856	1.2590320518954	0.208018755058182	0.559208313192845
piRNAdb-piRNA_Match_Genome-rno-piR-36458	42.214113452604	0.742320026354175	0.591033657029492	1.25596912718142	0.20912716361795	0.561052269261893
piRNAdb-piRNA_Match_Genome-rno-piR-6263	39.68025058683	0.811360226323341	0.649515879493067	1.24917688995778	0.211600382628828	0.566542959941701
piRNAdb-piRNA_Match_Genome-rno-piR-23235	58.1018520351174	0.602496524926262	0.483572573868582	1.24592782445515	0.212790893915408	0.568584118953042
piRNAdb-piRNA_Match_Genome-rno-piR-30253	16.8613066907027	-0.984954537941737	0.794571969659948	-1.23960393211866	0.215121925559062	0.573658468157499
piRNAdb-piRNA_Match_Genome-rno-piR-32440	13.8534649093391	1.36573302922893	1.10332930920136	1.23782901246185	0.2157794683908	0.574258785617199
piRNAdb-piRNA_Match_Genome-rno-piR-35880	13.2917233007825	1.28619701356671	1.04178781605964	1.23460554418029	0.216977344623091	0.57629182731893
piRNAdb-piRNA_Match_Genome-rno-piR-26677	85.735823215637	0.526815512304615	0.427426838977244	1.2325279188485	0.217751944147982	0.577194774108822
miRBase-miRNA_Match_Genome-rno-mir-331	43.6262980705116	0.792948013685641	0.644505358887109	1.23032028012126	0.218577192909441	0.578228111919796
piRNAdb-piRNA_Match_Genome-rno-piR-19338	12.59076689532	-1.61484305961136	1.31526491537555	-1.22777019346727	0.219533247780759	0.578452684628666
GtRNAdb-mature-tRNA_CCA_end_Unmatch_Genome-mature-tRNA-Ala-CGC_CCA_end	2234.73842403368	-0.395048290476298	0.321617638159607	-1.22831662074532	0.219328134056248	0.578452684628666
piRNAdb-piRNA_Match_Genome-rno-piR-31706	21.0271976771232	-0.926777646302073	0.757423478380713	-1.22359244564668	0.221106010814266	0.580294036287243
miRBase-miRNA_Match_Genome-rno-mir-20a	411.270585873322	0.391974134940238	0.320100199998471	1.22453573894084	0.220750192776068	0.580294036287243
GtRNAdb-mature-tRNA_Unmatch_Genome-mature-tRNA-Thr-TGT	55.1360888135586	0.659482517214967	0.541392503415451	1.21812273545446	0.223177335327884	0.584574953284871
piRNAdb-piRNA_Match_Genome-rno-piR-61471	42.594977391789	-0.790594046067562	0.651186928625235	-1.21408156600538	0.224716578533024	0.587043213908902
piRNAdb-piRNA_Match_Genome-rno-piR-52898	15.3246508826315	-1.36921459091701	1.12889310846664	-1.21288240724297	0.225174782747722	0.587043213908902
miRBase-miRNA_Match_Genome-rno-mir-880	68.4816615527213	0.573714089229943	0.473293543035817	1.21217391969898	0.225445812570437	0.587043213908902
piRNAdb-piRNA_Match_Genome-rno-piR-38581	26.4026617933279	-0.946700740470067	0.783419275724892	-1.20842155638064	0.226885152278561	0.58963499457129
piRNAdb-piRNA_Match_Genome-rno-piR-753	14.7284088375532	1.1991465108932	0.995285132614792	1.2048271109434	0.228270051636602	0.592075446432435
piRNAdb-piRNA_Match_Genome-rno-piR-37782	17.9808487922818	1.14706384241539	0.962446538285664	1.19182084072802	0.23333150217658	0.601678126000968
miRBase-miRNA_Match_Genome-rno-mir-672	4251.69653744336	0.521213724743737	0.436667477750916	1.19361699989265	0.23262782101408	0.601678126000968
miRBase-miRNA_Unmatch_Genome-rno-mir-30b	17.2412782130829	-1.13109936193471	0.948368706565379	-1.19267891707552	0.232995145594962	0.601678126000968
piRNAdb-piRNA_Match_Genome-rno-piR-38921	17.4759619998344	1.14235547944745	0.959703778625368	1.19032091452604	0.233920283564091	0.602027396459522
piRNAdb-piRNA_Match_Genome-rno-piR-2711	13.0239558994443	1.26490254918812	1.06580889118451	1.18680052273006	0.235306312611969	0.604423178237321
piRNAdb-piRNA_Match_Genome-rno-piR-55456	21.8388509053268	0.871091295371833	0.738127607246429	1.18013645177346	0.237945948828831	0.610023590819859
piRNAdb-piRNA_Match_Genome-rno-piR-47655	23.1171525039568	0.815559259385142	0.693159751325621	1.1765819608329	0.239362401319824	0.611860251738599
piRNAdb-piRNA_Match_Genome-rno-piR-19007	56.8528942121311	-0.614771848781526	0.52275289367839	-1.17602763411913	0.239583833512102	0.611860251738599
piRNAdb-piRNA_Match_Genome-rno-piR-20844	22.1017601623929	-0.808156287392848	0.688293938140646	-1.17414413030572	0.240337299848029	0.612047014796447
miRBase-miRNA_Match_Genome-rno-mir-292	12.7203799745236	-1.19290268118098	1.01649807163365	-1.17354150929556	0.240578721177519	0.612047014796447
miRBase-miRNA_Unmatch_Genome-rno-mir-486	800.699313973368	-0.398771957346615	0.341407952809693	-1.168021875486	0.24279794110827	0.615340055282258
miRBase-miRNA_Match_Genome-rno-mir-128-1	903.70205757396	-0.356306351931481	0.305052325067504	-1.16801716509663	0.242799841090289	0.615340055282258
piRNAdb-piRNA_Match_Genome-rno-piR-11422	98.4962681437579	0.495102645291354	0.425212706346162	1.16436465303625	0.244276265751821	0.617902630320796
piRNAdb-piRNA_Match_Genome-rno-piR-12910	26.7857973499938	-0.74469842468138	0.640910807078409	-1.16193769313407	0.245260774803552	0.619213515093378
piRNAdb-piRNA_Match_Genome-rno-piR-22165	35.1182175688809	0.827434115886434	0.713130321746694	1.1602845800467	0.245932960515986	0.619732393861916
piRNAdb-piRNA_Match_Genome-rno-piR-27673	25.7726998377234	0.793265650701034	0.684470241006032	1.15894834161832	0.246477242413944	0.619927609707799
piRNAdb-piRNA_Match_Genome-rno-piR-16075	37.8727326269197	-0.664097432146717	0.576161247269143	-1.15262426151424	0.249064640589845	0.623772745998539
piRNAdb-piRNA_Match_Genome-rno-piR-33392	14.9825287176547	1.16274612752034	1.00952884860083	1.15177107532079	0.249415156720802	0.623772745998539
miRBase-miRNA_Match_Genome-rno-mir-582	16.2144285144689	-0.956806053340301	0.829772982130572	-1.15309376654269	0.24887189990067	0.623772745998539
piRNAdb-piRNA_Match_Genome-rno-piR-15152	33.5621677656739	0.872769048057449	0.760387342425203	1.14779533977224	0.251053061615493	0.624677556443382
piRNAdb-piRNA_Match_Genome-rno-piR-30885	17.2419215443889	1.14481369637434	0.998500389138394	1.14653304978899	0.251574660368996	0.624677556443382
piRNAdb-piRNA_Match_Genome-rno-piR-28536	60.2442943462639	0.595368144524354	0.519368750916556	1.14633031631895	0.251658503537055	0.624677556443382
miRBase-miRNA_Match_Genome-rno-mir-883	242.152191929878	-0.433064587699641	0.377134999326177	-1.14830124086439	0.25084422704863	0.624677556443382
piRNAdb-piRNA_Match_Genome-rno-piR-24492	16.99947659554	0.953137717940926	0.832499307620023	1.14491112390927	0.252245975498473	0.624967640787263
piRNAdb-piRNA_Match_Genome-rno-piR-22574	142.855190560468	-0.466946308898777	0.408476805686116	-1.14314032620396	0.252980333509331	0.625070921689766
piRNAdb-piRNA_Match_Genome-rno-piR-44609	100.23838723038	0.479500239326621	0.421641722419047	1.13722199163695	0.255445495776525	0.625070921689766
piRNAdb-piRNA_Match_Genome-rno-piR-23313	23.1031812735978	0.812957479533982	0.714935815474589	1.13710554421494	0.25549416650483	0.625070921689766
piRNAdb-piRNA_Match_Genome-rno-piR-35958	23.0482818547349	-0.867530979623971	0.76319111351901	-1.13671525291203	0.255657340879604	0.625070921689766
piRNAdb-piRNA_Match_Genome-rno-piR-24045	122.458852118823	0.445644689704907	0.393279423683523	1.13315028162654	0.257151148941846	0.625070921689766
piRNAdb-piRNA_Match_Genome-rno-piR-47651	122.458852118823	0.445644689704907	0.393279423683523	1.13315028162654	0.257151148941846	0.625070921689766
piRNAdb-piRNA_Match_Genome-rno-piR-27371	105.984141606864	0.462932491266111	0.408805565789671	1.13240261387314	0.257465206449023	0.625070921689766
GtRNAdb-mature-tRNA_CCA_end_Unmatch_Genome-mature-tRNA-Cys-GCA_CCA_end	513.924437201904	0.342479484432998	0.301001837894273	1.1377986487687	0.255204569338305	0.625070921689766
miRBase-miRNA_Match_Genome-rno-mir-200c	11371.5251744392	-0.404005834554269	0.35535852532988	-1.13689641800272	0.255581589730586	0.625070921689766
miRBase-miRNA_Match_Genome-rno-mir-183	3289.24912068796	-0.444553470402194	0.391189442813736	-1.13641479484881	0.25578300678102	0.625070921689766
miRBase-miRNA_Match_Genome-rno-mir-201	3260.598602947	-0.487387311455796	0.429208574186771	-1.13554887010181	0.256145417917006	0.625070921689766
piRNAdb-piRNA_Match_Genome-rno-piR-37046	21.4413912146327	0.807674162793497	0.714270233219557	1.13076833561007	0.25815261059226	0.625596107420659
piRNAdb-piRNA_Match_Genome-rno-piR-14137	12.862396101307	-1.00701799639232	0.893133431966156	-1.12751125458988	0.259526384777911	0.62777967028245
piRNAdb-piRNA_Match_Genome-rno-piR-38295	49.2825804168601	0.612641922198018	0.544487853925852	1.12517096163076	0.260516595686554	0.629029161948625
piRNAdb-piRNA_Match_Genome-rno-piR-13744	58.104356357145	0.59626941505428	0.532490144899706	1.11977549399827	0.262809444718164	0.633126901091708
piRNAdb-piRNA_Match_Genome-rno-piR-37596	73.1942380628209	0.50554353507325	0.451807148512673	1.11893655675319	0.263167205875469	0.633126901091708
piRNAdb-piRNA_Match_Genome-rno-piR-17423	27.2601915133617	0.78209005923766	0.701542158017732	1.11481548229051	0.264929500497164	0.636214062676733
piRNAdb-piRNA_Match_Genome-rno-piR-34387	25.4648357813653	0.755144022600622	0.678074134060184	1.11365997413728	0.265425086689572	0.636253637407494
piRNAdb-piRNA_Match_Genome-rno-piR-28505	16.0527703612919	0.914290357463509	0.8269209589828	1.10565628737743	0.268875316918204	0.6424755845637
piRNAdb-piRNA_Match_Genome-rno-piR-28912	13.6912381877428	0.963322935358237	0.871473579971763	1.10539545603832	0.268988271850465	0.6424755845637
piRNAdb-piRNA_Match_Genome-rno-piR-37677	42.6935040672117	0.598174366257019	0.542542088717595	1.10254002168002	0.27022696920698	0.64427543107158
piRNAdb-piRNA_Match_Genome-rno-piR-31872	26.4489281249333	0.794601225302077	0.723542794294064	1.09820902311292	0.272113227068211	0.645842380097258
piRNAdb-piRNA_Match_Genome-rno-piR-21821	16.576757149518	-1.15936285308964	1.05644276391841	-1.09742135843639	0.272457240952551	0.645842380097258
piRNAdb-piRNA_Match_Genome-rno-piR-8862	21.483643297469	0.831213038773833	0.757548073173677	1.09724130812127	0.272535920005789	0.645842380097258
miRBase-miRNA_Match_Genome-rno-let-7f-2	39014.736436506	-0.408314582234466	0.372356220110769	-1.09656979038245	0.272829499423616	0.645842380097258
piRNAdb-piRNA_Match_Genome-rno-piR-4921	18.940168560039	-0.909962785161651	0.83371357945299	-1.09145731530328	0.275071704255514	0.645977039812635
piRNAdb-piRNA_Match_Genome-rno-piR-4577	13.4407453495229	-1.08577410743063	0.995304626879232	-1.09089627246592	0.275318527510506	0.645977039812635
miRBase-miRNA_Match_Genome-rno-mir-128-2	405.651493523636	-0.35333737451149	0.323048575944905	-1.0937592697259	0.274060571987101	0.645977039812635
miRBase-miRNA_Match_Genome-rno-mir-21	57686.3407261133	-0.382671559908164	0.349971040537663	-1.09343778651017	0.27420163054579	0.645977039812635
miRBase-miRNA_Match_Genome-rno-mir-212	58.6858042917444	-0.608402318126166	0.556764501154225	-1.09274624525251	0.274505229131461	0.645977039812635
piRNAdb-piRNA_Match_Genome-rno-piR-32664	15.8161351811144	-1.24934558913902	1.14849012450663	-1.08781570035329	0.276676476980355	0.646877396883646
miRBase-miRNA_Match_Genome-rno-let-7f-1	35397.1633151192	-0.404110123906204	0.371157000358738	-1.08878486332095	0.276248768141139	0.646877396883646
piRNAdb-piRNA_Match_Genome-rno-piR-11499	14.8110069290812	1.13985608804849	1.04974982397276	1.08583594111474	0.277551582098568	0.647782954353073
piRNAdb-piRNA_Match_Genome-rno-piR-7725	29.460866697749	0.933379585743189	0.862243906247388	1.08250064625611	0.279030128395089	0.647949199502924
piRNAdb-piRNA_Match_Genome-rno-piR-6404	24.7954928172341	-0.773811405111423	0.714847558642199	-1.08248450422244	0.279037297208995	0.647949199502924
piRNAdb-piRNA_Match_Genome-rno-piR-23662	12.569877462283	1.15769336800267	1.06998810151579	1.0819684502684	0.279266547159984	0.647949199502924
piRNAdb-piRNA_Match_Genome-rno-piR-19088	13.6325580385326	1.03775009124887	0.95974600462891	1.08127576071559	0.279574466351789	0.647949199502924
miRBase-miRNA_Match_Genome-rno-mir-146b	2019.03761987108	-0.347942336355822	0.322130344919764	-1.08012902802587	0.280084727098048	0.648000901718132
piRNAdb-piRNA_Match_Genome-rno-piR-12146	25.3876602242646	0.713483689458698	0.661876274125512	1.07797139337163	0.281046522582369	0.6486604574912
piRNAdb-piRNA_Match_Genome-rno-piR-59821	13.3513640657579	1.03857916236451	0.965250584076778	1.07596843710575	0.281941372555135	0.6486604574912
piRNAdb-piRNA_Match_Genome-rno-piR-34192	33.4223879884039	-0.663629086055407	0.617263808914224	-1.07511419991193	0.282323602733369	0.6486604574912
GtRNAdb-mature-tRNA_CCA_end_Unmatch_Genome-mature-tRNA-Leu-CAA_CCA_end	5838.82229650316	-0.393497810413891	0.36551944069364	-1.076544135839	0.281683973057422	0.6486604574912
miRBase-miRNA_Match_Genome-rno-mir-191a	32176.02862441	-0.28230657838808	0.263007958855754	-1.07337656098426	0.283102196656776	0.6493259363734
piRNAdb-piRNA_Match_Genome-rno-piR-16567	12.2592221278174	-1.01738856284473	0.949129735449824	-1.07191727837139	0.283757188764619	0.649555102020233
piRNAdb-piRNA_Match_Genome-rno-piR-36667	30.1081372545055	-0.679088749380794	0.63461414545494	-1.07008133090694	0.284582701647484	0.649555102020233
piRNAdb-piRNA_Match_Genome-rno-piR-16472	16.763687696047	-0.875407752760895	0.819054620333642	-1.06880265494906	0.285158602769425	0.649555102020233
miRBase-miRNA_Match_Genome-rno-mir-6329	14.6654735954228	-0.968888460127607	0.906171875731316	-1.06921047328431	0.284974840492369	0.649555102020233
piRNAdb-piRNA_Match_Genome-rno-piR-4595	58.6317770113115	-0.536142549955527	0.505219909464265	-1.06120629831087	0.288596157708408	0.656259755884872
piRNAdb-piRNA_Match_Genome-rno-piR-25647	13.2075150449921	-0.919518300558845	0.868945707991161	-1.05819994517793	0.289964296268935	0.658243735803669
piRNAdb-piRNA_Match_Genome-rno-piR-45413	45.6873571864687	0.584783647003874	0.554840813016693	1.05396653109273	0.291898240596367	0.661503180054565
piRNAdb-piRNA_Match_Genome-rno-piR-29633	16.4514374367446	0.880688039536324	0.836932029512683	1.05228143801489	0.292670445301662	0.661667437347555
piRNAdb-piRNA_Match_Genome-rno-piR-33349	12.9439246533	1.04773595145213	0.996292734972675	1.05163463977369	0.292967208705092	0.661667437347555
GtRNAdb-mature-tRNA_Unmatch_Genome-mature-tRNA-Leu-CAA	8221.34614825192	-0.319878008338456	0.305373345687305	-1.04749812927682	0.294869894528546	0.664164118507423
miRBase-miRNA_Match_Genome-rno-mir-881	3437.16962809824	0.404832824009945	0.387003862979074	1.04606920689015	0.295529081025922	0.664164118507423
miRBase-miRNA_Match_Genome-rno-mir-150	1257.99697299758	-0.299635392339185	0.286465431247444	-1.04597399775041	0.295573037679132	0.664164118507423
piRNAdb-piRNA_Match_Genome-rno-piR-27171	36.0610367930539	-0.609435228498341	0.583282420909665	-1.04483729776716	0.296098173407883	0.6642202268339
piRNAdb-piRNA_Match_Genome-rno-piR-6141	28.3865107960928	-0.682839812421578	0.655312750426804	-1.04200599176019	0.297408901009855	0.664449577183737
piRNAdb-piRNA_Match_Genome-rno-piR-33165	227.79502307044	0.36201394554682	0.347737531431503	1.04105514310332	0.297849956456959	0.664449577183737
piRNAdb-piRNA_Match_Genome-rno-piR-15458	17.8297330574933	-0.878690856033526	0.845652199624469	-1.03906884700794	0.298772718237712	0.664449577183737
piRNAdb-piRNA_Match_Genome-rno-piR-22790	42.9026314395178	-0.641424345759948	0.617856081189502	-1.03814523363608	0.299202445147496	0.664449577183737
miRBase-miRNA_Match_Genome-rno-mir-29c-1	129.664380161594	-0.485506269999868	0.467457661539709	-1.03861014578456	0.298986085297313	0.664449577183737
miRBase-miRNA_Match_Genome-rno-mir-29c-2	129.664380161594	-0.485506269999868	0.467457661539709	-1.03861014578456	0.298986085297313	0.664449577183737
piRNAdb-piRNA_Match_Genome-rno-piR-30950	21.2824788319726	0.723254605579679	0.698349163159056	1.03566330960856	0.300359245074507	0.664640100979689
piRNAdb-piRNA_Match_Genome-rno-piR-42618	39.7040516320564	0.703027492129035	0.67934416780323	1.03486204113945	0.300733344013094	0.664640100979689
piRNAdb-piRNA_Match_Genome-rno-piR-21995	31.2588788303101	-0.790364636851964	0.763828157700465	-1.0347414256518	0.300789684253609	0.664640100979689
piRNAdb-piRNA_Match_Genome-rno-piR-42273	41.1535262083568	0.555367027652856	0.539765194996644	1.02890485122204	0.303524388515571	0.668812104591363
piRNAdb-piRNA_Match_Genome-rno-piR-12255	16.5531490183433	-0.915463814526276	0.890056121791664	-1.02854616929488	0.303692984724364	0.668812104591363
piRNAdb-piRNA_Match_Genome-rno-piR-31631	50.2148984585923	-0.514186097549459	0.500428102095856	-1.02749245175477	0.304188637931614	0.668812104591363
piRNAdb-piRNA_Match_Genome-rno-piR-31175	13.3969755099401	0.866936044269993	0.848534286332711	1.02168652255269	0.306929291937751	0.673722478831955
piRNAdb-piRNA_Match_Genome-rno-piR-9430	17.2587700695463	-0.939533288891329	0.922168419217343	-1.0188304753363	0.308283454916529	0.675495052904343
piRNAdb-piRNA_Match_Genome-rno-piR-776	29.8205030314954	0.761814849763983	0.748587126250451	1.01767025246585	0.308834688774076	0.675495052904343
piRNAdb-piRNA_Match_Genome-rno-piR-34975	17.7082258750961	0.943664857046662	0.92810049202168	1.0167701290526	0.309262795305603	0.675495052904343
piRNAdb-piRNA_Match_Genome-rno-piR-2047	19.7027341178561	-0.819903182361711	0.809164773261904	-1.01327097947742	0.310930745193832	0.677645687670909
piRNAdb-piRNA_Match_Genome-rno-piR-18168	15.6927293175873	0.96251330682348	0.950788001317878	1.01233219759752	0.311379245014601	0.677645687670909
piRNAdb-piRNA_Match_Genome-rno-piR-6105	16.4745372260191	-0.913158344829289	0.904445423849202	-1.00963344028322	0.312670942117064	0.677645687670909
piRNAdb-piRNA_Match_Genome-rno-piR-19406	19.9584069261278	1.0300260272838	1.02036351738379	1.00946967402832	0.312749438426511	0.677645687670909
piRNAdb-piRNA_Match_Genome-rno-piR-43912	34.2907578586819	0.599065390728042	0.596021761810299	1.00510657347225	0.314845535162735	0.677645687670909
piRNAdb-piRNA_Match_Genome-rno-piR-4426	52.2495117373281	0.539980835302793	0.53751763830621	1.00458254170848	0.315097907280308	0.677645687670909
piRNAdb-piRNA_Match_Genome-rno-piR-17592	101.368425410385	0.423910852256424	0.422023424526988	1.00447232930625	0.315151002154711	0.677645687670909
piRNAdb-piRNA_Match_Genome-rno-piR-29737	14.4704082102234	0.920343388420562	0.917170428803173	1.00345950928829	0.315639203874323	0.677645687670909
piRNAdb-piRNA_Match_Genome-rno-piR-24070	26.7158016547362	0.698292335146257	0.696976346092761	1.00188814019425	0.316397621204203	0.677645687670909
piRNAdb-piRNA_Match_Genome-rno-piR-30626	18.814857299487	-0.750713650995204	0.749326696959732	-1.00185093369968	0.316415593306694	0.677645687670909
piRNAdb-piRNA_Match_Genome-rno-piR-62534	31.180664174381	0.729875916446715	0.729116044851237	1.00104218196931	0.316806415625349	0.677645687670909
piRNAdb-piRNA_Match_Genome-rno-piR-23533	18.6748785794572	-0.904922319826114	0.90465593136462	-1.00029446384228	0.317168025585419	0.677645687670909
piRNAdb-piRNA_Match_Genome-rno-piR-10648	13.2896532642462	0.883223672935114	0.88337109658631	0.999833112435118	0.317391278412127	0.677645687670909
miRBase-miRNA_Match_Genome-rno-mir-144	101.651925127574	-0.46911453870456	0.468387371396004	-1.00155249127744	0.316559776189153	0.677645687670909
piRNAdb-piRNA_Match_Genome-rno-piR-5681	21.0563153210953	0.697942386092805	0.699553733785586	0.997696606257734	0.318426499372493	0.67774076472416
piRNAdb-piRNA_Match_Genome-rno-piR-27961	14.3260795227372	0.831469423813024	0.833440719215901	0.997634750309857	0.318456503906533	0.67774076472416
piRNAdb-piRNA_Match_Genome-rno-piR-62124	24.7089689062746	0.784976530659421	0.789900498820646	0.99376634377548	0.320336635040166	0.680651282133344
piRNAdb-piRNA_Match_Genome-rno-piR-29444	103.311880126773	0.387300890644141	0.391241009373976	0.989929177577423	0.322208736868631	0.682445299141216
piRNAdb-piRNA_Match_Genome-rno-piR-9147	103.311880126773	0.387300890644141	0.391241009373976	0.989929177577423	0.322208736868631	0.682445299141216
piRNAdb-piRNA_Match_Genome-rno-piR-30556	17.6490208387777	0.742138065738854	0.754765096544205	0.983270250753294	0.32547444764342	0.687170216964168
piRNAdb-piRNA_Match_Genome-rno-piR-3358	17.6490208387777	0.742138065738854	0.754765096544205	0.983270250753294	0.32547444764342	0.687170216964168
piRNAdb-piRNA_Match_Genome-rno-piR-43323	31.6714481436881	0.850304706438768	0.870881260015596	0.976372722067231	0.328879794092384	0.688170702977512
piRNAdb-piRNA_Match_Genome-rno-piR-33394	13.9527629479258	-0.824091675537766	0.844516820585498	-0.975814401146478	0.329156446881237	0.688170702977512
piRNAdb-piRNA_Match_Genome-rno-piR-22147	26.6929908263668	-0.772301921955542	0.792555873280215	-0.974444765337684	0.329835751694602	0.688170702977512
piRNAdb-piRNA_Match_Genome-rno-piR-28751	16.5535401451967	0.823338716260258	0.845668369984796	0.973595259658417	0.330257540943862	0.688170702977512
miRBase-miRNA_Match_Genome-rno-mir-598-1	22.6805006209445	-0.797919126361356	0.815986887599302	-0.977857779931852	0.328144669092309	0.688170702977512
miRBase-miRNA_Match_Genome-rno-mir-598-2	22.6805006209445	-0.797919126361356	0.815986887599302	-0.977857779931852	0.328144669092309	0.688170702977512
GtRNAdb-mature-tRNA_CCA_end_Unmatch_Genome-mature-tRNA-Leu-CAG_CCA_end	9884.70455187843	-0.35324151270435	0.36194448946403	-0.975954940569567	0.329086794196702	0.688170702977512
GtRNAdb-mature-tRNA_5_end_Match_Genome-mature-tRNA-Lys-CTT_5_end	62796.0946788107	-0.307788048558285	0.315401496299473	-0.9758610918765	0.329133305448452	0.688170702977512
GtRNAdb-mature-tRNA_3_end_Match_Genome-mature-tRNA-Val-TAC_3_end	95.0755440818612	0.418527245509905	0.430193383635467	0.97288164214202	0.330612129894317	0.688170702977512
GtRNAdb-mature-tRNA_Match_Genome-mature-tRNA-Val-CAC	78364.9367904636	-0.27161872840116	0.279547324797505	-0.971637731099421	0.331230804808863	0.688379512967403
piRNAdb-piRNA_Match_Genome-rno-piR-33204	20.2257956571485	-0.715529785233637	0.741605113783419	-0.964839335563971	0.334625290406589	0.692188746576851
piRNAdb-piRNA_Match_Genome-rno-piR-6108	14.2217585648343	-0.797898497113647	0.829674928644685	-0.961700142508891	0.336200250761915	0.692188746576851
piRNAdb-piRNA_Match_Genome-rno-piR-19261	13.8599087248423	-0.820106246382381	0.85321135586012	-0.961199403582286	0.336451916224013	0.692188746576851
piRNAdb-piRNA_Match_Genome-rno-piR-35619	27.4293710125919	-0.830250424349229	0.864812945257374	-0.960034686000383	0.3370377581529	0.692188746576851
piRNAdb-piRNA_Match_Genome-rno-piR-46927	24.8552968054799	0.721062443816618	0.751495630896485	0.959503174963822	0.337305320980681	0.692188746576851
GtRNAdb-mature-tRNA_5_end_Match_Genome-mature-tRNA-Gly-TCC_5_end	20219.328895694	0.306495302180143	0.317733452059484	0.964630259085097	0.334730037849306	0.692188746576851
GtRNAdb-mature-tRNA_Unmatch_Genome-mature-tRNA-Cys-GCA	538.268524615073	0.286738661553743	0.297823061615346	0.962781928298355	0.335656971652258	0.692188746576851
GtRNAdb-mature-tRNA_3_end_Match_Genome-mature-tRNA-Ser-TGA_3_end	37.0701639364716	0.655527053814356	0.681180976072243	0.962339050620864	0.335879319026483	0.692188746576851
miRBase-miRNA_Match_Genome-rno-mir-330	33.1193726412081	-0.66648794338069	0.695264236028866	-0.958610998298233	0.337754749835692	0.692188746576851
piRNAdb-piRNA_Match_Genome-rno-piR-16624	170.020888414407	-0.350576933301879	0.368059348044884	-0.952501098434611	0.340842909129139	0.69744126860323
piRNAdb-piRNA_Match_Genome-rno-piR-17272	12.8485069005612	0.876628299927861	0.922923844470077	0.949838174818425	0.342194485243303	0.699129656004778
piRNAdb-piRNA_Match_Genome-rno-piR-62135	17.0732365004895	0.812839381640107	0.856840931806245	0.948646769157746	0.34280029567773	0.699291540184372
piRNAdb-piRNA_Match_Genome-rno-piR-17864	12.8135383871714	0.828520983857507	0.874509819907909	0.947411870051676	0.343428944881045	0.69949944601538
piRNAdb-piRNA_Match_Genome-rno-piR-27131	21.4621684813359	-0.755855293110985	0.799900883727784	-0.944936189579474	0.344691454207903	0.700995790487129
piRNAdb-piRNA_Match_Genome-rno-piR-59868	39.5023223817341	0.535780511162243	0.570577546855243	0.939014362053353	0.347723370555554	0.703927798929536
miRBase-miRNA_Match_Genome-rno-mir-29b-2	79.1827420580844	-0.409204636034284	0.435434458609061	-0.939761720607585	0.347339798013517	0.703927798929536
miRBase-miRNA_Match_Genome-rno-mir-29b-3	79.1827420580844	-0.409204636034284	0.435434458609061	-0.939761720607585	0.347339798013517	0.703927798929536
piRNAdb-piRNA_Match_Genome-rno-piR-29568	31.857374675913	-0.692444468941469	0.739419351460773	-0.936470580021333	0.349030953178368	0.705417915496011
piRNAdb-piRNA_Match_Genome-rno-piR-29033	40.5833557390371	0.552448813887334	0.590527699294296	0.935517190044653	0.349521828611728	0.705417915496011
piRNAdb-piRNA_Match_Genome-rno-piR-24665	12.4506054148633	0.884117057356945	0.949901218195132	0.930746313850212	0.351984806319144	0.709310808485316
piRNAdb-piRNA_Match_Genome-rno-piR-49771	25.890369403454	0.647894093625245	0.701709018537021	0.923308774021498	0.355846316770637	0.716005922229403
piRNAdb-piRNA_Match_Genome-rno-piR-39475	52.9757845417148	0.624320971333361	0.677737107607094	0.921184577804319	0.35695406865672	0.717148265016829
piRNAdb-piRNA_Match_Genome-rno-piR-18520	100.790153855671	0.360835251032046	0.39288846435142	0.918416506902826	0.358400852033627	0.717252638607018
piRNAdb-piRNA_Match_Genome-rno-piR-20355	26.1702248263171	0.645710332045448	0.703244238632487	0.918187873534637	0.358520516163292	0.717252638607018
piRNAdb-piRNA_Match_Genome-rno-piR-29625	19.6757340728548	0.854277969880454	0.931210413419739	0.917384468181836	0.358941208720921	0.717252638607018
piRNAdb-piRNA_Match_Genome-rno-piR-8427	14.3749779478627	-0.849885561401129	0.930511958399726	-0.91335264821609	0.361057101026278	0.717252638607018
piRNAdb-piRNA_Match_Genome-rno-piR-18229	12.4112569963474	0.910318460511155	0.998946822036054	0.911278198628975	0.362148810465541	0.717252638607018
piRNAdb-piRNA_Match_Genome-rno-piR-28847	14.9173950960835	-0.859104927634143	0.943590595021873	-0.910463639810047	0.362578048819	0.717252638607018
piRNAdb-piRNA_Match_Genome-rno-piR-917	28.6510245845928	0.622248899225408	0.684660528096883	0.908842957480026	0.363433027554209	0.717252638607018
piRNAdb-piRNA_Match_Genome-rno-piR-12341	24.2678963725093	-0.633914567739741	0.698233239538941	-0.907883686772531	0.363939677333477	0.717252638607018
piRNAdb-piRNA_Match_Genome-rno-piR-4766	45.1735522377265	0.508508650188995	0.561626864396143	0.905420809483072	0.36524249551386	0.717252638607018
piRNAdb-piRNA_Match_Genome-rno-piR-5788	17.1858952139149	0.880527769186565	0.972748010469234	0.9051961656152	0.365361472877909	0.717252638607018
piRNAdb-piRNA_Match_Genome-rno-piR-10472	42.1859214585983	0.542128592189332	0.599020512350533	0.905025088476588	0.365452096107852	0.717252638607018
piRNAdb-piRNA_Match_Genome-rno-piR-24499	45.1367175957747	-0.550454927835793	0.608442592756641	-0.904694928311764	0.365627028700317	0.717252638607018
piRNAdb-piRNA_Match_Genome-rno-piR-34034	20.1694049266843	-0.695206907628167	0.769150919430753	-0.903862805160121	0.366068153997793	0.717252638607018
piRNAdb-piRNA_Match_Genome-rno-piR-21958	37.1289105269414	-0.674629063322733	0.746746655176693	-0.903424285393155	0.366300755734562	0.717252638607018
piRNAdb-piRNA_Match_Genome-rno-piR-14195	13.1016348504652	0.779479549748295	0.864548749135475	0.901602773155074	0.367267917359015	0.717252638607018
miRBase-miRNA_Match_Genome-rno-mir-323	18.9876419495235	0.694258860150649	0.762204560171056	0.910856345434146	0.362371069657674	0.717252638607018
miRBase-miRNA_Unmatch_Genome-rno-mir-335	104.339717257043	-0.493493035068856	0.545067963252025	-0.905378903805941	0.365264688038567	0.717252638607018
miRBase-miRNA_Match_Genome-rno-mir-471	1759.88555559646	0.335296946692704	0.37043288647411	0.905148972825171	0.365386470509515	0.717252638607018
GtRNAdb-mature-tRNA_Match_Genome-mature-tRNA-Lys-CTT	80513.4327710532	-0.2707334120804	0.300220800456405	-0.901780994750607	0.367173217528067	0.717252638607018
piRNAdb-piRNA_Match_Genome-rno-piR-6915	12.3376455048464	-1.09088030535267	1.21192789624931	-0.900119808058501	0.368056495816617	0.717737190079982
piRNAdb-piRNA_Match_Genome-rno-piR-35235	27.0919097423267	0.69993464453169	0.78107548781777	0.896116515558851	0.370190537209164	0.719829178238342
piRNAdb-piRNA_Match_Genome-rno-piR-21766	62.3214219940887	0.459023480715282	0.512260799953617	0.896073798262222	0.3702133499524	0.719829178238342
piRNAdb-piRNA_Match_Genome-rno-piR-19327	13.7546826474656	0.915154803002977	1.02646367451238	0.891560827457164	0.372628374457443	0.722566385275035
piRNAdb-piRNA_Match_Genome-rno-piR-59852	27.3895044033792	-0.570214763810994	0.640405974715403	-0.890395758822204	0.373253418899604	0.722566385275035
GtRNAdb-mature-tRNA_3_end_Match_Genome-mature-tRNA-Thr-AGT_3_end	41.3037551512281	0.68918489186643	0.773805288648281	0.890643811791892	0.373120287286168	0.722566385275035
piRNAdb-piRNA_Match_Genome-rno-piR-29405	19.5813522981836	0.714430960000928	0.804210281369466	0.888363375290782	0.374345319515307	0.723625304681699
piRNAdb-piRNA_Match_Genome-rno-piR-9175	15.4385287648585	-1.11259230149581	1.25728446018058	-0.884916927499454	0.376201437566272	0.724839723294088
piRNAdb-piRNA_Match_Genome-rno-piR-28244	19.9443875203762	0.86652677618944	0.979781863325561	0.884407855079382	0.376476084159944	0.724839723294088
piRNAdb-piRNA_Match_Genome-rno-piR-61286	63.6135744020792	0.449195409075663	0.508048876269291	0.884157863657132	0.376611000807922	0.724839723294088
piRNAdb-piRNA_Match_Genome-rno-piR-51722	25.9788853011933	-0.585925372668404	0.665105819654602	-0.880950602676552	0.378344556930935	0.727122390165386
piRNAdb-piRNA_Match_Genome-rno-piR-27128	16.7075728145295	0.97383096540452	1.11112019476546	0.876440703708101	0.3807904985776	0.730765581085336
piRNAdb-piRNA_Match_Genome-rno-piR-28762	67.5385994394853	0.43434780939076	0.496234812200089	0.875286857576661	0.381417843218746	0.730913269544725
miRBase-miRNA_Match_Genome-rno-mir-205	4439.8551968772	0.279841150509136	0.320410185100462	0.873384066806097	0.382453772620732	0.731842377579729
piRNAdb-piRNA_Match_Genome-rno-piR-27289	17.0305629409103	0.789442676800761	0.914025463825138	0.863698778693751	0.38775338472752	0.740212385808407
piRNAdb-piRNA_Match_Genome-rno-piR-42281	15.846386762776	-0.764174808977195	0.88695040074882	-0.861575583405825	0.388921111946222	0.740212385808407
piRNAdb-piRNA_Match_Genome-rno-piR-16159	14.6545793756034	0.720332044421719	0.837027549299762	0.860583436022306	0.389467511965792	0.740212385808407
piRNAdb-piRNA_Match_Genome-rno-piR-22450	14.0652239752513	-0.824164044289036	0.957978135289676	-0.860316132413423	0.389614802469937	0.740212385808407
GtRNAdb-mature-tRNA_Match_Genome-mature-tRNA-Trp-CCA	5660.14954560057	0.328948284509982	0.381556628993336	0.862121791404461	0.388620500992179	0.740212385808407
piRNAdb-piRNA_Match_Genome-rno-piR-9092	69.0349368423605	0.510376806753092	0.595409180254985	0.857186660330837	0.391341733542054	0.74243117449121
piRNAdb-piRNA_Match_Genome-rno-piR-1532	75.0247380283475	0.371034719931676	0.43376890279131	0.855374180915371	0.392344032462694	0.742935298535146
piRNAdb-piRNA_Match_Genome-rno-piR-3141	18.9976935028911	-0.710023713253951	0.830744529580811	-0.854683585593064	0.39272634003891	0.742935298535146
piRNAdb-piRNA_Match_Genome-rno-piR-14253	112.625140107982	0.414393046237776	0.486968099403843	0.850965487770319	0.394788524511702	0.745774054838607
GtRNAdb-mature-tRNA_3_end_Match_Genome-mature-tRNA-Phe-GAA_3_end	57.3523381206493	0.554147626798336	0.652243570786757	0.849602282978283	0.39554624226138	0.746144047902148
piRNAdb-piRNA_Match_Genome-rno-piR-35430	15.9479721359387	-0.953611554820497	1.12514577000273	-0.847544896176596	0.396691473605852	0.746984617054093
piRNAdb-piRNA_Match_Genome-rno-piR-32279	17.3675564976767	-0.825591668129259	0.975056381387205	-0.846711722407987	0.397155823188378	0.746984617054093
piRNAdb-piRNA_Match_Genome-rno-piR-30900	13.6828412707569	-0.894788244888682	1.05795301256694	-0.845773143286993	0.397679310434671	0.746984617054093
GtRNAdb-mature-tRNA_Match_Genome-mature-tRNA-Leu-CAG	35352.8621231598	0.236793229365915	0.280702737573802	0.843572924911919	0.398908099198228	0.748234400755999
piRNAdb-piRNA_Match_Genome-rno-piR-46427	13.3086273396718	0.943461959176075	1.12624552253163	0.837705402863946	0.402196178288191	0.753337834649814
piRNAdb-piRNA_Match_Genome-rno-piR-27245	18.2354891427528	0.826667662010526	0.990927574139519	0.834236208159178	0.404147891185689	0.755927323231823
piRNAdb-piRNA_Match_Genome-rno-piR-29662	35.4284167549488	0.501061012368882	0.601661721259483	0.832795231380169	0.404960224608224	0.756381404050241
piRNAdb-piRNA_Match_Genome-rno-piR-5673	16.1286726269137	-0.799698564184781	0.963241975008752	-0.830215651864128	0.4064168673843	0.757238934459609
piRNAdb-piRNA_Match_Genome-rno-piR-16838	25.6475701199654	0.580720685140436	0.700941709970693	0.82848641603125	0.407395084763554	0.757238934459609
piRNAdb-piRNA_Match_Genome-rno-piR-22711	14.4280214431955	-0.92240486095845	1.11408259119098	-0.827950161192606	0.407698725547238	0.757238934459609
piRNAdb-piRNA_Match_Genome-rno-piR-25426	17.8289841376293	-0.848588087015955	1.02715967123893	-0.826150121326717	0.408718938567606	0.757238934459609
piRNAdb-piRNA_Match_Genome-rno-piR-22600	27.2403345287477	-0.616206727507705	0.746979790385587	-0.824930922414411	0.409410809444276	0.757238934459609
miRBase-miRNA_Match_Genome-rno-mir-148a	11819.220220779	-0.333292144438268	0.403458490849532	-0.826087818195323	0.408754277457665	0.757238934459609
miRBase-miRNA_Match_Genome-rno-mir-101a	2113.08312843104	-0.297467613130347	0.360243391202048	-0.825740653111684	0.40895122588329	0.757238934459609
piRNAdb-piRNA_Match_Genome-rno-piR-16698	13.5104609195043	0.869871049119102	1.05845038800028	0.821834503516541	0.411171093554352	0.757583315159137
piRNAdb-piRNA_Match_Genome-rno-piR-30281	16.295293908373	0.770767644042641	0.937866049845581	0.821831267023204	0.411172935816863	0.757583315159137
piRNAdb-piRNA_Match_Genome-rno-piR-36668	22.6078740837416	-0.58619137007174	0.714030696970065	-0.820961021086627	0.411668471161151	0.757583315159137
piRNAdb-piRNA_Match_Genome-rno-piR-4959	12.8845072267482	0.739595515165301	0.904100854005437	0.818045367271441	0.413331282714364	0.757583315159137
piRNAdb-piRNA_Match_Genome-rno-piR-12253	19.1518948442542	-0.672970773477452	0.82296426214847	-0.817739972961356	0.413505680392464	0.757583315159137
piRNAdb-piRNA_Match_Genome-rno-piR-31461	28.3418765310035	0.566241597199196	0.692638357035405	0.817514062638394	0.41363471618095	0.757583315159137
piRNAdb-piRNA_Match_Genome-rno-piR-29890	23.4956644576633	-0.641653496229454	0.785447224634111	-0.816927574641771	0.413969818498647	0.757583315159137
piRNAdb-piRNA_Match_Genome-rno-piR-45795	13.1985488211176	-0.900966999972715	1.10332371655384	-0.816593522331624	0.414160758136697	0.757583315159137
piRNAdb-piRNA_Match_Genome-rno-piR-27255	24.1021005247666	0.77783124304024	0.953718433782172	0.815577444545751	0.414741854186319	0.757602726766755
piRNAdb-piRNA_Match_Genome-rno-piR-52564	29.6209876491092	0.625619779133211	0.768985094196442	0.813565547440108	0.415893881578768	0.758094891679311
piRNAdb-piRNA_Match_Genome-rno-piR-42731	20.8178374630613	-0.740911434474807	0.911202981541903	-0.813113487865311	0.41615299400167	0.758094891679311
piRNAdb-piRNA_Match_Genome-rno-piR-30238	14.0810886933226	0.856470240625509	1.05667445564122	0.810533685235895	0.41763351297024	0.759749733184218
piRNAdb-piRNA_Match_Genome-rno-piR-10056	38.3580768986157	0.463024110710185	0.573063701676905	0.80798017629677	0.419101994114494	0.761378178090352
piRNAdb-piRNA_Match_Genome-rno-piR-23723	3821.60755516739	-0.271592549685059	0.337830093330587	-0.803932376205721	0.42143603066704	0.764572470936924
piRNAdb-piRNA_Match_Genome-rno-piR-10093	25.578584194638	0.62727086811349	0.782941714768127	0.801171857727953	0.423032160908261	0.766078440281298
piRNAdb-piRNA_Match_Genome-rno-piR-23377	12.9239132850595	0.694716283368859	0.867850507471351	0.800502249394367	0.423419860818127	0.766078440281298
piRNAdb-piRNA_Match_Genome-rno-piR-29896	20.9285936251162	-0.851606892733219	1.06966861766374	-0.796140859580613	0.42595016741242	0.767731288408499
piRNAdb-piRNA_Match_Genome-rno-piR-20739	13.5986112702531	-0.684856417647618	0.860438785188117	-0.795938571618303	0.426067740630319	0.767731288408499
miRBase-miRNA_Match_Genome-rno-mir-301a	22.5775167941341	0.53514092733284	0.672316157851245	0.795966185080508	0.426051690098761	0.767731288408499
piRNAdb-piRNA_Match_Genome-rno-piR-36176	19.0458397610248	-0.632634762752533	0.798814714004233	-0.791966837442582	0.428380013056556	0.770000195130952
piRNAdb-piRNA_Match_Genome-rno-piR-5431	12.4671571249761	0.744238440553197	0.945687490477628	0.786981373918051	0.431292769774142	0.770000195130952
piRNAdb-piRNA_Match_Genome-rno-piR-35601	13.2368763339372	0.71942991788382	0.914252196747725	0.786905320482743	0.431337292730119	0.770000195130952
piRNAdb-piRNA_Match_Genome-rno-piR-45006	21.9593663143201	-0.553641211033345	0.703997757711318	-0.78642467958026	0.431618729600063	0.770000195130952
piRNAdb-piRNA_Match_Genome-rno-piR-13185	13.5640480493476	0.712332607148728	0.906885584093829	0.785471309327846	0.432177285581368	0.770000195130952
piRNAdb-piRNA_Match_Genome-rno-piR-6145	25.3724808710796	0.515591548760899	0.656811121405316	0.784992111061909	0.432458193985561	0.770000195130952
piRNAdb-piRNA_Match_Genome-rno-piR-19172	14.3360632652922	0.861173577621071	1.09908330703662	0.783538037660671	0.433311225847089	0.770000195130952
piRNAdb-piRNA_Match_Genome-rno-piR-45412	50.0295761698292	0.410284913665595	0.523840609277408	0.783224718357645	0.433495161919021	0.770000195130952
piRNAdb-piRNA_Match_Genome-rno-piR-12825	15.8634836246529	-0.677655969529871	0.8656074964892	-0.782867491649925	0.433704929185205	0.770000195130952
GtRNAdb-mature-tRNA_5_end_Match_Genome-mature-tRNA-Ile-TAT_5_end	24.6530061182899	0.640770308216003	0.814517511718686	0.786686963751013	0.431465137228812	0.770000195130952
miRBase-miRNA_Match_Genome-rno-mir-743a	4160.966335242	0.286444958639618	0.364839784740542	0.785125336161802	0.432380086162012	0.770000195130952
piRNAdb-piRNA_Match_Genome-rno-piR-36129	21.9021541411367	-0.591638084432681	0.760483769210448	-0.77797595213233	0.436583190234081	0.774075402711429
GtRNAdb-mature-tRNA_CCA_end_Unmatch_Genome-mature-tRNA-Thr-TGT_CCA_end	45.8025832004559	0.42360551187905	0.547559519118764	0.773624596209734	0.439152822505011	0.777593264382206
piRNAdb-piRNA_Match_Genome-rno-piR-7774	29.1575780996313	-0.560249616221381	0.725279281950072	-0.772460526812551	0.439841717232996	0.777776032603753
piRNAdb-piRNA_Match_Genome-rno-piR-5748	22.0260119184138	-0.601919719366537	0.780756291542619	-0.770944436678523	0.440739866492773	0.778064045621422
piRNAdb-piRNA_Match_Genome-rno-piR-28753	25.24383026034	0.573828007342457	0.745029688864826	0.770208242596046	0.441176375265761	0.778064045621422
piRNAdb-piRNA_Match_Genome-rno-piR-41655	15.6197867322216	0.614333854773896	0.799975897307038	0.767940455258628	0.442522561385204	0.779403131988794
piRNAdb-piRNA_Match_Genome-rno-piR-10875	18.1074559881169	0.608066201207298	0.794681800095873	0.76516940633841	0.444170674727069	0.780236317509983
GtRNAdb-mature-tRNA_3_end_Match_Genome-mature-tRNA-Trp-CCA_3_end	144.284885492305	0.332156498093427	0.433688263331839	0.765887680569478	0.443743136759874	0.780236317509983
piRNAdb-piRNA_Match_Genome-rno-piR-58909	20.0014590152648	0.607777071156531	0.796991367562255	0.762589277491837	0.445708381265394	0.781903210462938
piRNAdb-piRNA_Match_Genome-rno-piR-56458	13.3370568924749	-0.723013431554465	0.957074232440569	-0.755441330512847	0.449984222267781	0.787584779086247
piRNAdb-piRNA_Match_Genome-rno-piR-2999	28.4926632335518	0.522793788673595	0.692265110549829	0.755193033285136	0.450133168167516	0.787584779086247
piRNAdb-piRNA_Match_Genome-rno-piR-52283	29.1215999603777	0.584857766227441	0.775741406249719	0.753933928904098	0.4508888961757	0.787869018580697
piRNAdb-piRNA_Match_Genome-rno-piR-33469	27.1560653473166	0.513786000756313	0.683533607267404	0.751661652468414	0.45225455704035	0.789216887975801
piRNAdb-piRNA_Match_Genome-rno-piR-8423	13.5000390870004	0.798687919885812	1.06546728736806	0.749612803091072	0.453487937577191	0.790330683861561
piRNAdb-piRNA_Match_Genome-rno-piR-31320	15.2127258181586	0.727287827217508	0.973699662896334	0.746932401161711	0.455104366470217	0.791071464230953
GtRNAdb-mature-tRNA_Unmatch_Genome-mature-tRNA-Ala-AGC	1927.73981010562	-0.217455868924205	0.290848041555363	-0.74766145153091	0.454664388299935	0.791071464230953
piRNAdb-piRNA_Match_Genome-rno-piR-3506	14.1152735210487	0.663432359167467	0.892597755330325	0.74326016977485	0.457324180994392	0.793890865830788
piRNAdb-piRNA_Match_Genome-rno-piR-33992	13.345078225965	-0.871388419674029	1.17844449784756	-0.739439507983303	0.459640159394017	0.796428635411591
piRNAdb-piRNA_Match_Genome-rno-piR-1713	12.7352952268201	0.792892201032907	1.07311360322518	0.738870701713142	0.459985514578833	0.796428635411591
piRNAdb-piRNA_Match_Genome-rno-piR-22542	21.7564016965766	0.565940617424804	0.770443827677634	0.734564412217736	0.462604818339011	0.79729612074941
piRNAdb-piRNA_Match_Genome-rno-piR-11524	43.6899585101476	-0.479044557604539	0.652506273408998	-0.734160845844112	0.462850713526417	0.79729612074941
piRNAdb-piRNA_Match_Genome-rno-piR-11792	200.598048772242	0.289568213131404	0.394935453476295	0.733203895934313	0.463434079521519	0.79729612074941
piRNAdb-piRNA_Match_Genome-rno-piR-61556	19.1012397453007	-0.584279145947431	0.797621015910795	-0.732527270837077	0.463846803899989	0.79729612074941
piRNAdb-piRNA_Match_Genome-rno-piR-53930	17.3190472414904	0.734913268878719	1.00471768808422	0.731462457160518	0.464496727941089	0.79729612074941
piRNAdb-piRNA_Match_Genome-rno-piR-24220	22.9043848740086	0.522897743265741	0.718540905709818	0.727721607928767	0.466784020342661	0.79729612074941
piRNAdb-piRNA_Match_Genome-rno-piR-146	15.5298992041222	-0.663156811562958	0.912232188280046	-0.726960548074166	0.467250124033288	0.79729612074941
piRNAdb-piRNA_Match_Genome-rno-piR-8476	15.765471815353	-0.672956297657748	0.925867451971599	-0.726838702694121	0.467324771006638	0.79729612074941
piRNAdb-piRNA_Match_Genome-rno-piR-37613	229.527718350823	-0.27819530354359	0.38279695516619	-0.726743773138979	0.467382932934902	0.79729612074941
piRNAdb-piRNA_Match_Genome-rno-piR-10224	13.6864373897796	0.78362026798249	1.08147482356894	0.724584845532037	0.468706758672383	0.79729612074941
piRNAdb-piRNA_Match_Genome-rno-piR-56451	40.7683783861011	0.450604880107413	0.623195120215577	0.723055854403254	0.469645569554479	0.79729612074941
piRNAdb-piRNA_Match_Genome-rno-piR-27338	23.1247195933423	-0.527201260987554	0.730044284638406	-0.722149699793456	0.470202444770837	0.79729612074941
piRNAdb-piRNA_Match_Genome-rno-piR-30968	29.3017498134992	0.434945943540149	0.602748432155415	0.721604437832865	0.470537709927444	0.79729612074941
piRNAdb-piRNA_Match_Genome-rno-piR-22048	39.0965226234652	0.418627557710121	0.580337313528965	0.721352130822839	0.470692890562905	0.79729612074941
GtRNAdb-mature-tRNA_Unmatch_Genome-mature-tRNA-SeC-TCA	5251.52406103669	-0.27311409659953	0.373810817130544	-0.730621170077461	0.465010577495999	0.79729612074941
miRBase-miRNA_Match_Genome-rno-mir-101b	1518.79701179523	0.29838068686085	0.409547157402673	0.728562465805318	0.466269345219456	0.79729612074941
GtRNAdb-mature-tRNA_Unmatch_Genome-mature-tRNA-Ile-TAT	1051.53665654907	0.21295689650471	0.293762913591984	0.72492777900648	0.468496337887124	0.79729612074941
miRBase-miRNA_Match_Genome-rno-mir-369	61.9994196743819	-0.496296374743497	0.689373735930821	-0.719923531860954	0.47157207848055	0.797767796461364
piRNAdb-piRNA_Match_Genome-rno-piR-23193	31.2813739609442	-0.428473241654202	0.598075468270378	-0.716420024538605	0.473732033953343	0.798888490472321
piRNAdb-piRNA_Match_Genome-rno-piR-14247	20.5001596113195	-0.55775364564022	0.778580632620339	-0.716372360513363	0.473761456869167	0.798888490472321
GtRNAdb-mature-tRNA_CCA_end_Unmatch_Genome-mature-tRNA-Arg-CCT_CCA_end	402.069516420758	-0.313399158315232	0.437755754411577	-0.71592241828208	0.474039254888696	0.798888490472321
miRBase-miRNA_Match_Genome-rno-mir-135b	23.7416096557229	0.677019689017869	0.948124395346529	0.714062091789576	0.475188785414299	0.799810782040798
piRNAdb-piRNA_Match_Genome-rno-piR-15920	32.171318001993	-0.447135041156248	0.627995840947641	-0.712003188558581	0.476462801542327	0.800940000567354
piRNAdb-piRNA_Match_Genome-rno-piR-21397	39.6873138729877	-0.521732940633139	0.734397781296409	-0.710422817062629	0.477441977981972	0.801571361264298
GtRNAdb-mature-tRNA_3_end_Match_Genome-mature-tRNA-Lys-TTT_3_end	62.2468179713014	0.431433300006455	0.608713480195033	0.708762519713253	0.478471860180432	0.80196207872691
miRBase-miRNA_Match_Genome-rno-mir-425	4675.4239035885	0.194473771025332	0.274641249494299	0.708101100557253	0.478882476227741	0.80196207872691
piRNAdb-piRNA_Match_Genome-rno-piR-41977	12.371048735545	-0.749467345056356	1.06755806580512	-0.70203895138119	0.482654872416143	0.805233254483213
miRBase-miRNA_Match_Genome-rno-mir-210	12.7254309475122	0.803042290021955	1.14126204319927	0.703644088408312	0.481654447705898	0.805233254483213
GtRNAdb-mature-tRNA_CCA_end_Unmatch_Genome-mature-tRNA-SeC-TCA_CCA_end	5127.01813564008	-0.263640654617653	0.375411517750941	-0.702271086931754	0.482510120799997	0.805233254483213
piRNAdb-piRNA_Match_Genome-rno-piR-39734	12.2889998090064	-0.668201492134243	0.959923451260043	-0.696098726681934	0.486367003899912	0.810408257439251
piRNAdb-piRNA_Match_Genome-rno-piR-226	4168.03720517628	-0.234544072660852	0.3388450017147	-0.69218690396482	0.488819961858549	0.812562842156817
piRNAdb-piRNA_Match_Genome-rno-piR-27689	24.8583919939192	-0.452899231242699	0.654398076966092	-0.692085211103343	0.488883818436217	0.812562842156817
piRNAdb-piRNA_Match_Genome-rno-piR-32316	40.2156403178629	0.455321197960483	0.662894060462599	0.686868724759335	0.492165457030078	0.816591793347596
piRNAdb-piRNA_Match_Genome-rno-piR-26614	13.9998216652064	-0.634421182141138	0.927627326487375	-0.683918168456169	0.494026840656975	0.816591793347596
piRNAdb-piRNA_Match_Genome-rno-piR-30425	13.8081194577822	0.640846580053768	0.93770081389612	0.683423295103124	0.494339404168239	0.816591793347596
piRNAdb-piRNA_Match_Genome-rno-piR-5794	21.295305213436	-0.597230119524096	0.877625342909287	-0.680506920577641	0.49618354131621	0.816591793347596
piRNAdb-piRNA_Match_Genome-rno-piR-15605	17.8821596315092	-0.602492876412856	0.88635893993216	-0.679739154499835	0.496669639224803	0.816591793347596
piRNAdb-piRNA_Match_Genome-rno-piR-16047	19.9690170410424	-0.493860347903015	0.726830887974639	-0.679470776591771	0.496839617949964	0.816591793347596
piRNAdb-piRNA_Match_Genome-rno-piR-28775	17.0026970182858	-0.584727209214316	0.861693106859248	-0.678579420631048	0.497404385901713	0.816591793347596
piRNAdb-piRNA_Match_Genome-rno-piR-23097	12.4796393218309	-0.736452235367451	1.08673469459178	-0.67767435698194	0.497978188746875	0.816591793347596
piRNAdb-piRNA_Match_Genome-rno-piR-12737	15.2372210318656	-0.602781116539991	0.889678693310505	-0.677526753278799	0.498071801665326	0.816591793347596
GtRNAdb-mature-tRNA_Unmatch_Genome-mature-tRNA-Arg-CCT	458.678038842952	-0.279082711868229	0.409834827896277	-0.68096387342381	0.495894349987349	0.816591793347596
miRBase-miRNA_Match_Genome-rno-mir-463	4290.16029812885	0.242371485501977	0.357512727353572	0.677938061942833	0.497810965634532	0.816591793347596
piRNAdb-piRNA_Match_Genome-rno-piR-29244	20.7441859891239	-0.539796756710498	0.798251345820919	-0.676224048398406	0.498898406304134	0.816938450766819
piRNAdb-piRNA_Match_Genome-rno-piR-36721	78.2615673329901	0.323235817622606	0.481707126714955	0.671021456184263	0.502206861026772	0.821343240694032
piRNAdb-piRNA_Match_Genome-rno-piR-30175	14.3507852312051	0.648251016285368	0.972327574686548	0.666700228566845	0.504963632769585	0.824157923144282
piRNAdb-piRNA_Match_Genome-rno-piR-23166	14.1757108770369	0.630884254975128	0.946735357971182	0.666378676642107	0.505169088433317	0.824157923144282
piRNAdb-piRNA_Match_Genome-rno-piR-14349	17.9411975213911	0.505118915864836	0.760613994235941	0.664093639734097	0.506630380657781	0.825527785906176
piRNAdb-piRNA_Match_Genome-rno-piR-33413	17.0295717831101	-0.706802251860136	1.07397162726248	-0.658120041459337	0.510460998684872	0.830750252761655
GtRNAdb-mature-tRNA_Unmatch_Genome-mature-tRNA-Met-CAT	393.284282221814	-0.214737255168147	0.329795616470325	-0.651122223716605	0.514967591601351	0.837058704585795
piRNAdb-piRNA_Match_Genome-rno-piR-55871	12.6968727602008	0.612720199801678	0.943073107077358	0.649705940296119	0.515882186076095	0.8375202238497
piRNAdb-piRNA_Match_Genome-rno-piR-26877	24.8196589228682	-0.666238523520447	1.03405320530138	-0.644298107780896	0.519382142428954	0.839702381732105
piRNAdb-piRNA_Match_Genome-rno-piR-17350	22.2062774523168	0.480554246844772	0.747632029920725	0.642768404258614	0.520374387658318	0.839702381732105
piRNAdb-piRNA_Match_Genome-rno-piR-51653	17.1040504021004	0.530186727802959	0.824903322297059	0.642725897050068	0.520401973988641	0.839702381732105
piRNAdb-piRNA_Match_Genome-rno-piR-21721	22.9986423364253	-0.50704058253701	0.789502873322238	-0.642227659544008	0.520725376372737	0.839702381732105
piRNAdb-piRNA_Match_Genome-rno-piR-23455	30.4260018593781	-0.576670133523741	0.904189358258598	-0.637775846681458	0.523619604451144	0.839702381732105
piRNAdb-piRNA_Match_Genome-rno-piR-28608	19.7580358224084	-0.518445655264867	0.813462214067209	-0.63733219109552	0.523908486836173	0.839702381732105
piRNAdb-piRNA_Match_Genome-rno-piR-30173	19.7580358224084	-0.518445655264867	0.813462214067209	-0.63733219109552	0.523908486836173	0.839702381732105
piRNAdb-piRNA_Match_Genome-rno-piR-20769	30.6558634804735	-0.376494749658726	0.591036124493242	-0.637008017033705	0.524119621547772	0.839702381732105
piRNAdb-piRNA_Match_Genome-rno-piR-29506	20.0407901571122	0.504748511929911	0.792496944425156	0.636909095335421	0.524184057977793	0.839702381732105
piRNAdb-piRNA_Match_Genome-rno-piR-35558	23.6202511174169	0.43839152092136	0.690627762465778	0.634772513859206	0.525576792198688	0.839702381732105
piRNAdb-piRNA_Match_Genome-rno-piR-71	20.3092217959358	-0.448583418751447	0.706949014105573	-0.634534329634777	0.525732170157012	0.839702381732105
piRNAdb-piRNA_Match_Genome-rno-piR-42274	33.886036684166	0.372115159024305	0.586929276189978	0.634003404021473	0.526078600603246	0.839702381732105
miRBase-miRNA_Match_Genome-rno-mir-293	132.748597623665	-0.291974551609829	0.456569476805184	-0.639496432509906	0.522500033709239	0.839702381732105
miRBase-miRNA_Match_Genome-rno-mir-18a	51.1148670746363	-0.368748240826168	0.579455983835841	-0.636369717653367	0.524535473661754	0.839702381732105
piRNAdb-piRNA_Match_Genome-rno-piR-35280	19.7695181264018	-0.574455232019325	0.908299475738723	-0.632451352624771	0.527091987078995	0.840309914574916
piRNAdb-piRNA_Match_Genome-rno-piR-20139	30.2425231859535	-0.378606861771614	0.600551206910215	-0.630432271911522	0.52841180195255	0.841403924452022
piRNAdb-piRNA_Match_Genome-rno-piR-635	27.8834225092859	0.400394282112107	0.637125277073344	0.628438858918503	0.529716487723748	0.84148524882405
GtRNAdb-mature-tRNA_CCA_end_Unmatch_Genome-mature-tRNA-Ser-AGA_CCA_end	1280.54262489546	-0.186317894710109	0.296487219032708	-0.628417964585365	0.529730171699477	0.84148524882405
piRNAdb-piRNA_Match_Genome-rno-piR-42161	23.8302719572936	-0.440044331608291	0.703028758110181	-0.625926502339932	0.53136315039962	0.841750104724248
piRNAdb-piRNA_Match_Genome-rno-piR-23488	19.0149387802433	-1.17884039387879	1.88350890549313	-0.62587460587034	0.531397192011668	0.841750104724248
piRNAdb-piRNA_Match_Genome-rno-piR-15482	27.4730340266903	-0.398486452422397	0.637558897596379	-0.625019043612607	0.531958559431068	0.841750104724248
piRNAdb-piRNA_Match_Genome-rno-piR-27097	15.5753097092308	-0.500261262936618	0.801318839178065	-0.624297393843566	0.532432295156904	0.841750104724248
piRNAdb-piRNA_Match_Genome-rno-piR-38871	24.598890231633	-0.492603468091311	0.793581742961905	-0.620734376086772	0.534774407376434	0.841839640247933
piRNAdb-piRNA_Match_Genome-rno-piR-28377	18.2084391076715	0.47786834314013	0.770315265673974	0.620354242521764	0.535024590639499	0.841839640247933
miRBase-miRNA_Match_Genome-rno-mir-1b	1496.87005281951	0.293438864799931	0.472534580284797	0.620989186914269	0.534606737774687	0.841839640247933
GtRNAdb-mature-tRNA_CCA_end_Unmatch_Genome-mature-tRNA-Lys-CTT_CCA_end	611.925044656381	0.244734234535938	0.394121782591833	0.620960944930551	0.534625320144769	0.841839640247933
piRNAdb-piRNA_Match_Genome-rno-piR-40089	13.8722652255024	-0.574433757653984	0.928645012672446	-0.618571951407873	0.536198384338179	0.84268811171728
piRNAdb-piRNA_Match_Genome-rno-piR-32579	48.2479632802674	0.330808342040342	0.535671614358329	0.617558095619107	0.536866674456507	0.842741068177591
piRNAdb-piRNA_Match_Genome-rno-piR-44215	31.0823569179513	-0.404467465359686	0.658833390281449	-0.613914642648728	0.539271733650249	0.845516956655881
piRNAdb-piRNA_Match_Genome-rno-piR-60935	17.6826817265707	0.497940444214276	0.813160015802437	0.612352347062837	0.54030466270783	0.846137490655659
piRNAdb-piRNA_Match_Genome-rno-piR-28921	16.0401442764415	0.664211916926467	1.0879660028214	0.610507971024812	0.541525364787585	0.847050276134174
miRBase-miRNA_Match_Genome-rno-mir-7a-1	8001.09987174663	-0.193463434804052	0.319422493085792	-0.605666285223348	0.544736376363741	0.851070479777703
piRNAdb-piRNA_Match_Genome-rno-piR-28034	83.418821960637	-0.257611301355231	0.427125615947889	-0.603127725747688	0.54642372322606	0.851710636724058
piRNAdb-piRNA_Match_Genome-rno-piR-32623	77.4599651328351	0.270249598434464	0.448621908898707	0.602399466173826	0.54690826526688	0.851710636724058
piRNAdb-piRNA_Match_Genome-rno-piR-13598	13.1659690329455	0.545284138371011	0.905552626026343	0.602156211245031	0.547070160486161	0.851710636724058
piRNAdb-piRNA_Match_Genome-rno-piR-48602	23.9031468369782	0.457508607963626	0.766209929137014	0.597106080939098	0.550436558241075	0.854582469940089
miRBase-miRNA_Match_Genome-rno-mir-133a	176.122225592506	-0.234829355990467	0.393547830925439	-0.596698387177637	0.550708769598064	0.854582469940089
miRBase-miRNA_Match_Genome-rno-mir-741	19719.7038535395	0.200504063795218	0.336137659462797	0.596493901087002	0.550845327009575	0.854582469940089
piRNAdb-piRNA_Match_Genome-rno-piR-38023	15.8736666526283	0.575449179642381	0.968482099092516	0.594176371645472	0.552394154617844	0.854942494295585
piRNAdb-piRNA_Match_Genome-rno-piR-6267	17.2591198618299	0.460766926867755	0.776835838135249	0.593132942957163	0.553092185312638	0.854942494295585
miRBase-miRNA_Match_Genome-rno-mir-375	5543.74156325826	-0.162368831167382	0.272950435529713	-0.594865624054687	0.551933297262163	0.854942494295585
GtRNAdb-mature-tRNA_3_end_Match_Genome-mature-tRNA-Gln-TTG_3_end	92.7376941104835	0.352513797201017	0.595165100305998	0.592295813413414	0.553652518896237	0.854942494295585
piRNAdb-piRNA_Match_Genome-rno-piR-8189	79.9557713320241	0.931606955371725	1.58102505804016	0.589242371987794	0.555698696818566	0.855651430918619
piRNAdb-piRNA_Match_Genome-rno-piR-39554	23.1737215814944	0.465981242016592	0.791506780238593	0.588726784976025	0.556044566929795	0.855651430918619
GtRNAdb-mature-tRNA_3_end_Match_Genome-mature-tRNA-Gln-CTG_3_end	341.305705798988	0.285565815526059	0.484138913797249	0.589842723623018	0.555296096633864	0.855651430918619
piRNAdb-piRNA_Match_Genome-rno-piR-43331	16.4390322259568	0.505904701307483	0.863401467912773	0.585943758620749	0.557913309958719	0.855958562537507
piRNAdb-piRNA_Match_Genome-rno-piR-36797	15.0677624099052	0.48203405488306	0.823215540286254	0.585550237202087	0.558177797558344	0.855958562537507
GtRNAdb-mature-tRNA_5_end_Match_Genome-mature-tRNA-Gly-CCC_5_end	96468.7007134234	-0.170952310247932	0.29179616299675	-0.585862091167512	0.557968194025388	0.855958562537507
piRNAdb-piRNA_Match_Genome-rno-piR-2063	13.0173692100588	0.642970209573371	1.10827992279147	0.580151454836336	0.561812487216939	0.860538619404955
piRNAdb-piRNA_Match_Genome-rno-piR-20830	30.3688454022457	-0.397885342103669	0.687988700490085	-0.578331216515966	0.563040522708118	0.860850537440317
miRBase-miRNA_Match_Genome-rno-mir-7a-2	7715.81846361281	-0.183372544874098	0.317292946540119	-0.577928210739196	0.563312588129244	0.860850537440317
piRNAdb-piRNA_Match_Genome-rno-piR-895	12.8742570310432	0.702621478886607	1.21907163601274	0.576357826833452	0.564373343917858	0.861480230715995
piRNAdb-piRNA_Match_Genome-rno-piR-38676	14.5312630563011	0.564373897855626	0.982852232515018	0.574220497430678	0.565818600421601	0.861509796262535
piRNAdb-piRNA_Match_Genome-rno-piR-32172	45.3420848402224	-0.380261642803276	0.663006012819074	-0.57354177104129	0.566277924926023	0.861509796262535
piRNAdb-piRNA_Match_Genome-rno-piR-35737	26.3797062534815	0.411055236013416	0.717971358313076	0.572523167190428	0.566967595260967	0.861509796262535
piRNAdb-piRNA_Match_Genome-rno-piR-2500	18.4862549890708	-0.427337326943361	0.750214355568223	-0.569620300880126	0.568935256363433	0.861509796262535
piRNAdb-piRNA_Match_Genome-rno-piR-62582	18.4862549890708	-0.427337326943361	0.750214355568223	-0.569620300880126	0.568935256363433	0.861509796262535
piRNAdb-piRNA_Match_Genome-rno-piR-19772	15.4452641177456	0.469814294654413	0.830612573597382	0.565623865552201	0.571649500677785	0.861509796262535
piRNAdb-piRNA_Match_Genome-rno-piR-19321	19.7603470512164	-0.529316792785383	0.936252011739826	-0.565357175363245	0.571830846626279	0.861509796262535
piRNAdb-piRNA_Match_Genome-rno-piR-11398	25.1797950730177	-0.378265913546564	0.670018073295885	-0.564560761302806	0.572372560816719	0.861509796262535
piRNAdb-piRNA_Match_Genome-rno-piR-35209	13.9011887177927	0.473258139982414	0.839267679324317	0.563894156347624	0.572826167243839	0.861509796262535
miRBase-miRNA_Match_Genome-rno-mir-93	1905.16364533564	-0.171330925409094	0.302285136879448	-0.566785807525234	0.570859714182587	0.861509796262535
miRBase-miRNA_Match_Genome-rno-mir-350-1	31.5922346177069	-0.447815438304786	0.79134931593437	-0.565888450634517	0.571469613205396	0.861509796262535
miRBase-miRNA_Match_Genome-rno-mir-350-2	31.5922346177069	-0.447815438304786	0.79134931593437	-0.565888450634517	0.571469613205396	0.861509796262535
GtRNAdb-mature-tRNA_CCA_end_Match_Genome-mature-tRNA-Ile-AAT_CCA_end	8586.71268409877	-0.17034904997331	0.301181640405335	-0.565602371193847	0.571664115555713	0.861509796262535
piRNAdb-piRNA_Match_Genome-rno-piR-27092	76.4227846526552	-0.247308500296608	0.440036736388252	-0.562017849524281	0.574103857813194	0.862454664226155
piRNAdb-piRNA_Match_Genome-rno-piR-18434	12.9336938064285	-0.582888509544815	1.04107453791864	-0.559891235751619	0.575553627134977	0.86365561224322
GtRNAdb-mature-tRNA_CCA_end_Unmatch_Genome-mature-tRNA-Ile-AAT_CCA_end	139.608580473727	0.207133147004133	0.371038084573814	0.558253062464066	0.576671591509126	0.864356516392911
piRNAdb-piRNA_Match_Genome-rno-piR-4973	15.4339329089037	1.24710640076037	2.24496246733917	0.555513251960288	0.578543648394329	0.866184853514846
piRNAdb-piRNA_Match_Genome-rno-piR-27922	42.6608271657404	-0.411773721118757	0.744117852499718	-0.553371646353442	0.580008950052914	0.866723156689038
miRBase-miRNA_Match_Genome-rno-mir-34c	13825.1904910028	0.174745749622346	0.315950113094377	0.553080193296681	0.580208498717285	0.866723156689038
piRNAdb-piRNA_Match_Genome-rno-piR-23949	76.6810744338445	-0.233898039100989	0.425577922764281	-0.54960096985703	0.582593093475514	0.868467119911984
piRNAdb-piRNA_Match_Genome-rno-piR-43796	13.3454984591232	0.565081734963292	1.03020157659277	0.548515696153575	0.583337854639676	0.868467119911984
GtRNAdb-mature-tRNA_3_end_Match_Genome-mature-tRNA-Met-CAT_3_end	25.1271250189233	-0.380989343113698	0.69413341240664	-0.548870485563812	0.58309433417263	0.868467119911984
piRNAdb-piRNA_Match_Genome-rno-piR-10493	135.474607664746	-0.213612077717899	0.391091045048935	-0.546195266862148	0.584931719324786	0.868891860473508
miRBase-miRNA_Match_Genome-rno-mir-143	46955.4308543482	-0.246164362677213	0.450421330894246	-0.546520215169405	0.584708395830174	0.868891860473508
miRBase-miRNA_Match_Genome-rno-mir-3551	37.0355938105817	0.41997572026992	0.770538547163475	0.545041804613078	0.585724766068205	0.869097753450923
piRNAdb-piRNA_Match_Genome-rno-piR-8134	14.6777041246547	-0.492659129361045	0.907095632640181	-0.543117077884189	0.587049194929114	0.870090771055651
GtRNAdb-mature-tRNA_Unmatch_Genome-mature-tRNA-Lys-CTT	662.54173123054	0.20533345796238	0.379230662957451	0.541447403965376	0.588199240881429	0.870823402330589
piRNAdb-piRNA_Match_Genome-rno-piR-21025	16.3850950414054	-0.461651882809494	0.855222908039232	-0.539802989922151	0.58933290490043	0.871530175621126
piRNAdb-piRNA_Match_Genome-rno-piR-22405	20.0456111687399	0.389867548334994	0.725765206327556	0.537181370691167	0.591142338167017	0.873233620785093
piRNAdb-piRNA_Match_Genome-rno-piR-29482	13.483401937507	-0.495145778536178	0.923941760878391	-0.535905832490397	0.592023633300093	0.873563761136137
piRNAdb-piRNA_Match_Genome-rno-piR-36183	16.6655634664998	0.51223334845306	0.958765713239781	0.534263315197374	0.593159369206303	0.873897749145207
piRNAdb-piRNA_Match_Genome-rno-piR-4187	42.0162574647486	0.285278672817267	0.534554603433866	0.533675458006903	0.593566091663386	0.873897749145207
piRNAdb-piRNA_Match_Genome-rno-piR-37399	18.3409595676526	0.393612462516078	0.739760588042674	0.532080877081509	0.594669981282077	0.874454160579846
piRNAdb-piRNA_Match_Genome-rno-piR-2002	15.7789627966555	-0.491801364530583	0.926656385952317	-0.530726785015529	0.595608122062439	0.874454160579846
piRNAdb-piRNA_Match_Genome-rno-piR-26726	18.8227092607823	0.42160270316321	0.795060289415455	0.530277651614548	0.595919439250573	0.874454160579846
piRNAdb-piRNA_Match_Genome-rno-piR-31059	17.057091367258	0.517696986234105	0.980992682808341	0.527727673515429	0.597688363006752	0.876081838932635
piRNAdb-piRNA_Match_Genome-rno-piR-9179	16.3882757767608	0.443238127975397	0.842156205147887	0.526313438369266	0.598670447537816	0.876264148988924
miRBase-miRNA_Match_Genome-rno-mir-215	13.8123546803828	0.565646403375225	1.07609238102208	0.525648553368599	0.599132415121945	0.876264148988924
piRNAdb-piRNA_Match_Genome-rno-piR-27497	20.4582815324709	-0.388431462578566	0.741245203440817	-0.524025600132709	0.600260734290627	0.876948575509299
piRNAdb-piRNA_Match_Genome-rno-piR-33709	13.6990734173246	0.467903470832525	0.895441553050486	0.522539376510422	0.601294837638071	0.877494004816877
piRNAdb-piRNA_Match_Genome-rno-piR-42237	36.916543706972	-0.285353654770337	0.549717798578157	-0.51909116915698	0.603697166198299	0.880032751604106
miRBase-miRNA_Match_Genome-rno-mir-466c	22.7934716572708	-0.44469710940887	0.861237762979285	-0.51634650560436	0.605612420714458	0.881856682794737
piRNAdb-piRNA_Match_Genome-rno-piR-39615	14.7285171435892	0.424396488796432	0.828494504946257	0.512250215617256	0.608475902849943	0.884153828142594
miRBase-miRNA_Match_Genome-rno-mir-15b	4510.10169421687	-0.139298588824164	0.271969282531143	-0.512185006805736	0.608521535333081	0.884153828142594
piRNAdb-piRNA_Match_Genome-rno-piR-15290	12.3828214598351	0.461797956937365	0.903995137829344	0.510841195502694	0.609462260354339	0.884552876230122
piRNAdb-piRNA_Match_Genome-rno-piR-16019	17.466785628616	-0.494415424686906	0.974925088732599	-0.507131707247011	0.612062408829777	0.887356854722647
piRNAdb-piRNA_Match_Genome-rno-piR-14847	13.2309748145543	0.560182232451324	1.10777795398599	0.50568097192735	0.61308062825129	0.887863766976787
piRNAdb-piRNA_Match_Genome-rno-piR-29525	33.0306210466286	-0.307503513746207	0.611940661984767	-0.502505443499783	0.615312024266291	0.890124584123785
piRNAdb-piRNA_Match_Genome-rno-piR-35453	31.9820007664785	-0.405472436107392	0.809736116180548	-0.500746388860569	0.616549620279531	0.890944391437668
GtRNAdb-mature-tRNA_Unmatch_Genome-mature-tRNA-Ala-CGC	2594.11360401569	-0.159801838815745	0.321187722123141	-0.497534083057129	0.618812474249222	0.893242354133659
piRNAdb-piRNA_Match_Genome-rno-piR-11627	12.4989564080846	0.559110242725455	1.13618690898786	0.492093544030992	0.622653215963157	0.897810500324726
piRNAdb-piRNA_Match_Genome-rno-piR-28125	16.6189173382396	0.398214445104155	0.813308177927092	0.489623067751635	0.624400650046377	0.899353647789141
piRNAdb-piRNA_Match_Genome-rno-piR-33213	13.0747407378775	0.442845200557109	0.908146206468736	0.487636459198659	0.625807366087969	0.900403230947804
GtRNAdb-mature-tRNA_5_end_Match_Genome-mature-tRNA-Pro-CGG_5_end	83.2595933779021	-0.226322231470138	0.465855411385265	-0.485820763135813	0.627094251734543	0.901278318510253
piRNAdb-piRNA_Match_Genome-rno-piR-57623	16.0902486772621	0.428845736773834	0.886157186246098	0.48393867750539	0.628429390062184	0.902220789191979
piRNAdb-piRNA_Match_Genome-rno-piR-38239	19.8218478574428	0.370560183838127	0.771586597849213	0.480257413582686	0.631044366538092	0.904932089012328
piRNAdb-piRNA_Match_Genome-rno-piR-15790	44.4872819066811	0.286057416474463	0.598896834229847	0.477640555309195	0.632906060543081	0.904932089012328
piRNAdb-piRNA_Match_Genome-rno-piR-11735	35.3119899930278	-0.3009279286961	0.630182168854823	-0.477525299141598	0.632988110075282	0.904932089012328
piRNAdb-piRNA_Match_Genome-rno-piR-21904	34.4469406385074	0.293638003771407	0.615016518547265	0.477447344772155	0.633043607449136	0.904932089012328
piRNAdb-piRNA_Match_Genome-rno-piR-29296	62.0245028176317	0.269605735289195	0.566361484514348	0.476031196790122	0.634052152666366	0.905399202947241
piRNAdb-piRNA_Match_Genome-rno-piR-24617	17.0648939589562	0.359059507961499	0.756400570032412	0.474694919844009	0.63500443941765	0.905785065033983
piRNAdb-piRNA_Match_Genome-rno-piR-12644	54.3533762301983	0.265675816307985	0.561158789391281	0.473441423943796	0.635898282223847	0.906086822739559
piRNAdb-piRNA_Match_Genome-rno-piR-23554	57.9503037100361	0.242509986659292	0.514768848800677	0.471104627298833	0.637566020864767	0.907489470212659
piRNAdb-piRNA_Match_Genome-rno-piR-30859	14.2483581422757	0.507287468110445	1.08001551655856	0.469703870298923	0.638566602343517	0.907940522389925
piRNAdb-piRNA_Match_Genome-rno-piR-35858	43.2891276483704	-0.34355104311955	0.736070220212017	-0.466736778211995	0.64068821312509	0.909982831048257
piRNAdb-piRNA_Match_Genome-rno-piR-37671	33.8352405238198	-0.286519345604178	0.618211286010308	-0.463465084005925	0.643031036602669	0.911492585603325
piRNAdb-piRNA_Match_Genome-rno-piR-51752	13.1260508676573	-0.451937243942953	0.975399581770284	-0.463335490797236	0.64312391017343	0.911492585603325
piRNAdb-piRNA_Match_Genome-rno-piR-33507	46.6243652788289	-0.275458002906837	0.596845012640744	-0.461523506224961	0.644423060833637	0.912360154357218
piRNAdb-piRNA_Match_Genome-rno-piR-11961	55.4153545013379	-0.317808040196639	0.691042307306001	-0.459896647190243	0.645590406903991	0.912468192592125
piRNAdb-piRNA_Match_Genome-rno-piR-28808	14.0719595439049	-0.38788270427931	0.847863928752901	-0.457482257618668	0.647324452092793	0.912468192592125
piRNAdb-piRNA_Match_Genome-rno-piR-34400	46.830731249154	-0.289128566528324	0.63495361495712	-0.455353839583777	0.648854698507085	0.912468192592125
piRNAdb-piRNA_Match_Genome-rno-piR-22127	14.3975513918785	0.452679921194047	0.995463077796926	0.45474305505723	0.649294102097132	0.912468192592125
piRNAdb-piRNA_Match_Genome-rno-piR-9102	19.3975424823968	0.355614476955505	0.782332717307851	0.454556570482235	0.6494282850177	0.912468192592125
piRNAdb-piRNA_Match_Genome-rno-piR-19475	26.6857156146677	0.289602615607492	0.642830733066176	0.450511465477303	0.652341688839525	0.912468192592125
piRNAdb-piRNA_Match_Genome-rno-piR-35900	15.2391930702768	0.468686116720464	1.04102689660563	0.450215184880102	0.652555288186728	0.912468192592125
piRNAdb-piRNA_Match_Genome-rno-piR-35256	28.3712954949518	0.283341764931604	0.629983582136674	0.449760554030014	0.652883103332754	0.912468192592125
piRNAdb-piRNA_Match_Genome-rno-piR-51550	13.7807053526709	-0.449950067153387	1.00086839926025	-0.449559669868634	0.653027973793399	0.912468192592125
piRNAdb-piRNA_Match_Genome-rno-piR-23873	34.1980764805054	-0.335747837675044	0.747861698677067	-0.448943752927803	0.653472232561086	0.912468192592125
piRNAdb-piRNA_Match_Genome-rno-piR-15841	15.1956471719753	0.420299101039321	0.937831938217427	0.448160362120104	0.654037467146322	0.912468192592125
piRNAdb-piRNA_Match_Genome-rno-piR-17569	16.0557765602796	-0.359881938775603	0.804633665729427	-0.447261846109009	0.654686011587084	0.912468192592125
piRNAdb-piRNA_Match_Genome-rno-piR-22752	40.095577974306	0.270592447382647	0.607285662873508	0.445576874155531	0.655902918532644	0.912468192592125
piRNAdb-piRNA_Match_Genome-rno-piR-32332	12.4389907989424	-0.425594646304912	0.957053021182303	-0.444692861195036	0.656541729011233	0.912468192592125
piRNAdb-piRNA_Match_Genome-rno-piR-27603	14.2384648969668	-0.474872337320354	1.06910321662681	-0.444178195271596	0.656913755540492	0.912468192592125
piRNAdb-piRNA_Match_Genome-rno-piR-25466	23.0333664022138	0.349051920714847	0.7900413222901	0.441814764451873	0.658623253643224	0.912468192592125
piRNAdb-piRNA_Match_Genome-rno-piR-3928	22.1069267400999	0.337345498866089	0.765921426314741	0.440444002838827	0.65961556090997	0.912468192592125
GtRNAdb-mature-tRNA_Unmatch_Genome-mature-tRNA-Ile-AAT	161.411141020505	0.161304998156583	0.353810556040921	0.45590781677505	0.648456268267126	0.912468192592125
GtRNAdb-mature-tRNA_Unmatch_Genome-mature-tRNA-Asp-GTC	48573.432840635	-0.144950039206319	0.319741647628517	-0.453334872955696	0.650307625192309	0.912468192592125
GtRNAdb-mature-tRNA_CCA_end_Unmatch_Genome-mature-tRNA-Met-CAT_CCA_end	361.321381671379	-0.143293616315744	0.323445766317685	-0.443022080477635	0.657749763729498	0.912468192592125
miRBase-miRNA_Match_Genome-rno-let-7a-1	23681.2687180703	-0.162718535169533	0.367907907451843	-0.442280613908338	0.658286157531575	0.912468192592125
GtRNAdb-mature-tRNA_CCA_end_Unmatch_Genome-mature-tRNA-Pro-AGG_CCA_end	59.6973202986542	0.225741319130515	0.511893124430554	0.440993067413509	0.659218015852183	0.912468192592125
piRNAdb-piRNA_Match_Genome-rno-piR-33173	38.3211070935912	-0.240383665397483	0.550266769417968	-0.43684932246907	0.662220626472307	0.912801884925573
piRNAdb-piRNA_Match_Genome-rno-piR-5208	36.6876180745227	-0.250062391227349	0.574861154305764	-0.434996154035384	0.663565219056247	0.912801884925573
piRNAdb-piRNA_Match_Genome-rno-piR-57115	20.5090059303545	-0.330330705206219	0.766861024819072	-0.430756935761803	0.666645115179254	0.912801884925573
piRNAdb-piRNA_Match_Genome-rno-piR-39495	14.2045677508341	0.416009237752141	0.966914862880237	0.430243916732169	0.667018218831541	0.912801884925573
piRNAdb-piRNA_Match_Genome-rno-piR-7466	35.3114120960319	-0.322688654465302	0.750833574353608	-0.429773874647393	0.667360138919027	0.912801884925573
piRNAdb-piRNA_Match_Genome-rno-piR-5594	15.5793958729121	0.410832568993883	0.956128927885181	0.42968323309973	0.667426081740385	0.912801884925573
piRNAdb-piRNA_Match_Genome-rno-piR-21876	16.9952645375638	0.371589152975094	0.866371710665234	0.428902685072408	0.667994046103862	0.912801884925573
piRNAdb-piRNA_Match_Genome-rno-piR-28235	12.9174673738731	-0.485014775273701	1.14006359120536	-0.425427826145126	0.670524824798879	0.912801884925573
piRNAdb-piRNA_Match_Genome-rno-piR-16333	47.1207028513919	-0.269509489026841	0.634515796168947	-0.42474827365067	0.671020188970168	0.912801884925573
piRNAdb-piRNA_Match_Genome-rno-piR-49944	27.7726794855946	0.366071248096262	0.862107405188558	0.424623713812313	0.671111003180971	0.912801884925573
piRNAdb-piRNA_Match_Genome-rno-piR-60566	14.2271524058805	-0.957008168495206	2.26873995676429	-0.421823649573353	0.673153742266457	0.912801884925573
piRNAdb-piRNA_Match_Genome-rno-piR-14695	28.5585099133032	0.291267011219431	0.693033387795081	0.420278469044775	0.674282036899795	0.912801884925573
piRNAdb-piRNA_Match_Genome-rno-piR-35409	28.5585099133032	0.291267011219431	0.693033387795081	0.420278469044775	0.674282036899795	0.912801884925573
piRNAdb-piRNA_Match_Genome-rno-piR-34318	49.4040920870577	0.234652202283547	0.559100923964164	0.419695608119917	0.674707833891102	0.912801884925573
piRNAdb-piRNA_Match_Genome-rno-piR-19783	12.9321562469144	-0.387108596962274	0.925968630120953	-0.418058003662293	0.675904709070616	0.912801884925573
piRNAdb-piRNA_Match_Genome-rno-piR-25387	110.399017748114	0.190973618188968	0.459380345955172	0.415720045209779	0.677614871445716	0.912801884925573
piRNAdb-piRNA_Match_Genome-rno-piR-41741	40.0388783921883	0.303481457953864	0.732071786277326	0.414551501154148	0.678470258106178	0.912801884925573
piRNAdb-piRNA_Match_Genome-rno-piR-26862	12.8167903197845	0.364422268253287	0.880541993084384	0.413861316229542	0.678975675557849	0.912801884925573
piRNAdb-piRNA_Match_Genome-rno-piR-45548	12.2560664318117	0.448629611330207	1.08678568919185	0.412804121172973	0.679750131790127	0.912801884925573
piRNAdb-piRNA_Match_Genome-rno-piR-34852	23.5814948964983	0.386086843547771	0.935401722191647	0.412749767707471	0.679789957975446	0.912801884925573
GtRNAdb-mature-tRNA_5_end_Match_Genome-mature-tRNA-Asp-GTC_5_end	9611.06777835588	0.118360823545554	0.269539574766158	0.439122246327796	0.66057296046432	0.912801884925573
GtRNAdb-mature-tRNA_5_end_Match_Genome-mature-tRNA-Arg-TCG_5_end	559.986947059703	-0.21143969156327	0.486553656138043	-0.434566031712815	0.663877455577349	0.912801884925573
miRBase-miRNA_Match_Genome-rno-mir-409a	16.5570136459468	-0.420321399739818	0.97383391774249	-0.431615075303799	0.666021199855958	0.912801884925573
miRBase-miRNA_Match_Genome-rno-mir-872	1006.40855871829	0.137995488947752	0.322962674067114	0.427279992483204	0.669175403747045	0.912801884925573
GtRNAdb-mature-tRNA_Unmatch_Genome-mature-tRNA-Pro-AGG	66.3670511014032	0.205585234734892	0.485179045989689	0.4237306545577	0.671762256319007	0.912801884925573
miRBase-miRNA_Match_Genome-rno-let-7a-2	23494.5022204152	-0.155627196991676	0.368308930511441	-0.422545271371969	0.672627063955137	0.912801884925573
miRBase-miRNA_Match_Genome-rno-mir-486	14.8601658569396	-0.388153394673322	0.920023543666909	-0.421895067083035	0.673101610782701	0.912801884925573
miRBase-miRNA_Match_Genome-rno-mir-340-1	1201.6341616831	-0.167966876228653	0.404991810375649	-0.41474141433343	0.67833121141003	0.912801884925573
miRBase-miRNA_Match_Genome-rno-mir-340-2	1201.6341616831	-0.167966876228653	0.404991810375649	-0.41474141433343	0.67833121141003	0.912801884925573
piRNAdb-piRNA_Match_Genome-rno-piR-49508	12.3206783111618	-0.422015095338267	1.03002840026246	-0.409712096511838	0.682017155447037	0.913061328256355
piRNAdb-piRNA_Match_Genome-rno-piR-990	17.2000227407047	0.321727338953078	0.785305164910598	0.409684481051012	0.682037415641439	0.913061328256355
piRNAdb-piRNA_Match_Genome-rno-piR-1685	13.5250697488115	-0.390656216689926	0.953580492561003	-0.409673037292061	0.682045811468602	0.913061328256355
piRNAdb-piRNA_Match_Genome-rno-piR-24557	15.1313478807899	-0.338191416606021	0.835552851363529	-0.404751675557244	0.685660053359308	0.916929732416664
piRNAdb-piRNA_Match_Genome-rno-piR-18199	16.3379762904788	-0.357512983379371	0.886255187523336	-0.403397337936549	0.686655944796543	0.916929732416664
piRNAdb-piRNA_Match_Genome-rno-piR-35779	24.6361613729525	-0.35032372785237	0.869996268191611	-0.402672678792702	0.68718903541092	0.916929732416664
piRNAdb-piRNA_Match_Genome-rno-piR-20881	12.4561130273964	0.354701209715097	0.883226951571487	0.401596904492093	0.687980708367188	0.916929732416664
piRNAdb-piRNA_Match_Genome-rno-piR-20919	59.478250707205	-0.197361632618253	0.492972864371589	-0.400349891205142	0.688898825851371	0.916929732416664
piRNAdb-piRNA_Match_Genome-rno-piR-20093	20.0255309052727	0.385836689557731	0.964335430058233	0.400106308999175	0.68907821758421	0.916929732416664
piRNAdb-piRNA_Match_Genome-rno-piR-37202	40.2265515719449	0.221513634116875	0.557699983573221	0.397191394372333	0.691226327674838	0.917908966556408
piRNAdb-piRNA_Match_Genome-rno-piR-46753	24.472565825662	0.278431636322103	0.702552396671546	0.396314406784771	0.691873100444853	0.917908966556408
piRNAdb-piRNA_Match_Genome-rno-piR-2727	22.9235778504622	0.278466560444	0.702675629784706	0.396294603997181	0.691887707472112	0.917908966556408
GtRNAdb-mature-tRNA_Unmatch_Genome-mature-tRNA-Ala-TGC	3136.23900544484	-0.123406426784392	0.312491838601497	-0.394910879390245	0.69290866064015	0.918346009311497
piRNAdb-piRNA_Match_Genome-rno-piR-4055	12.9036912595024	-0.37996356095783	0.966543524844645	-0.393115830990541	0.694233932024849	0.918799499350267
piRNAdb-piRNA_Match_Genome-rno-piR-4385	37.2806684499807	-0.242476139983427	0.617658039601056	-0.392573437787746	0.694634561255774	0.918799499350267
piRNAdb-piRNA_Match_Genome-rno-piR-27236	14.4370960599354	-0.412905394123184	1.05663308118781	-0.390774623163435	0.695963834242239	0.919319727753356
piRNAdb-piRNA_Match_Genome-rno-piR-8517	15.7972763516557	0.349208614052086	0.899880376367264	0.388061150374019	0.697970780974404	0.919319727753356
piRNAdb-piRNA_Match_Genome-rno-piR-15144	15.0662633500886	-0.339790379547829	0.877622332385847	-0.387171528126566	0.698629226858783	0.919319727753356
piRNAdb-piRNA_Match_Genome-rno-piR-49553	12.260604023527	0.347710903432056	0.90196037926034	0.385505739971859	0.699862754612287	0.919319727753356
piRNAdb-piRNA_Match_Genome-rno-piR-42866	29.574075842123	0.304357004667661	0.792260202324865	0.384162935074277	0.700857687974308	0.919319727753356
piRNAdb-piRNA_Match_Genome-rno-piR-37668	38.8172526360396	0.219814315512021	0.574034470349804	0.382928773211251	0.701772576517708	0.919319727753356
piRNAdb-piRNA_Match_Genome-rno-piR-7709	12.6900217403544	0.418679447495944	1.09743935238627	0.381505772128153	0.702827988962848	0.919319727753356
piRNAdb-piRNA_Match_Genome-rno-piR-45718	33.8054353042259	0.284114381009014	0.748899831318459	0.379375677664158	0.704408909413496	0.919319727753356
piRNAdb-piRNA_Match_Genome-rno-piR-17288	32.3905338516591	0.252615291522541	0.665937763321086	0.379337688048696	0.704437116288591	0.919319727753356
piRNAdb-piRNA_Match_Genome-rno-piR-467	15.046010376601	0.353691428590748	0.93536297792384	0.378132807197279	0.705331937884469	0.919319727753356
piRNAdb-piRNA_Match_Genome-rno-piR-22390	13.2157017916732	0.355254476097162	0.943941508619634	0.376352213408505	0.706655067003666	0.919319727753356
GtRNAdb-mature-tRNA_Unmatch_Genome-mature-tRNA-Pro-CGG	28.4265436605918	0.245315025457296	0.636715145420114	0.385282221134277	0.700028332231054	0.919319727753356
miRBase-miRNA_Match_Genome-rno-mir-449a	1721.97563431148	0.132100485631115	0.346844817009722	0.380863369301587	0.703304634619574	0.919319727753356
miRBase-miRNA_Match_Genome-rno-mir-363	122.597419698466	0.210010319457411	0.555042808861719	0.378367787320945	0.705157394569856	0.919319727753356
miRBase-miRNA_Match_Genome-rno-mir-138-1	12.756293753194	-0.346551174877365	0.918762517830004	-0.377193418486284	0.706029870988519	0.919319727753356
miRBase-miRNA_Match_Genome-rno-mir-298	31.8607925786008	0.314821809087581	0.836211340286375	0.376485935935484	0.706555669207133	0.919319727753356
GtRNAdb-mature-tRNA_Unmatch_Genome-mature-tRNA-Arg-ACG	1139.66578283242	0.122248975092763	0.324990001245977	0.376162265374544	0.706796266593507	0.919319727753356
piRNAdb-piRNA_Match_Genome-rno-piR-36402	34.3319160017281	0.214131965847691	0.580066952136361	0.369150431789041	0.712015600241818	0.923961880013711
piRNAdb-piRNA_Match_Genome-rno-piR-17024	28.6964685112811	-0.249786423546286	0.67723127341401	-0.368834744277358	0.712250905517364	0.923961880013711
piRNAdb-piRNA_Match_Genome-rno-piR-37846	43.787992248069	0.196109817252711	0.532091238255843	0.368564267089879	0.712452533986476	0.923961880013711
piRNAdb-piRNA_Match_Genome-rno-piR-2531	15.5586865941109	-0.338176186180766	0.924001907895266	-0.365990787779951	0.714371949688699	0.925547267499114
piRNAdb-piRNA_Match_Genome-rno-piR-19919	29.8229978406255	-0.263931493511261	0.725660966732781	-0.363711851141156	0.716073192696244	0.925992742787723
piRNAdb-piRNA_Match_Genome-rno-piR-17941	60.7781938419302	0.208460484282606	0.573225769081175	0.363662095332433	0.716110351538397	0.925992742787723
piRNAdb-piRNA_Match_Genome-rno-piR-38432	49.9830925141372	0.246207347187723	0.682825426698399	0.360571439728287	0.718419842790071	0.927680529372595
piRNAdb-piRNA_Match_Genome-rno-piR-3810	28.7119577824248	-0.223068219515288	0.624407901452743	-0.357247592473284	0.720906459784009	0.927680529372595
piRNAdb-piRNA_Match_Genome-rno-piR-30351	16.8984514822039	0.336492900007298	0.943868822764388	0.35650388262829	0.721463244938625	0.927680529372595
piRNAdb-piRNA_Match_Genome-rno-piR-34814	25.5314014558511	-0.250588033013256	0.703282593847201	-0.356312007727153	0.721606917802629	0.927680529372595
miRBase-miRNA_Match_Genome-rno-mir-224	47.904281331647	-0.182649777493139	0.507483230570873	-0.359912932073981	0.718912245826237	0.927680529372595
GtRNAdb-mature-tRNA_CCA_end_Match_Genome-mature-tRNA-Glu-TTC_CCA_end	875.140120461997	-0.118196551715909	0.331104969665873	-0.35697607267926	0.721109718424075	0.927680529372595
piRNAdb-piRNA_Match_Genome-rno-piR-1711	12.8044187994965	-0.342572298146631	0.972068634049536	-0.35241575146758	0.72452649080444	0.928990400229759
piRNAdb-piRNA_Match_Genome-rno-piR-15168	15.7265466040358	-0.294144016664496	0.844570231105916	-0.348276562245548	0.727632493941931	0.928990400229759
piRNAdb-piRNA_Match_Genome-rno-piR-15616	15.4117581446303	0.314902762930762	0.907631658083976	0.346949955002149	0.728628916189711	0.928990400229759
piRNAdb-piRNA_Match_Genome-rno-piR-34655	17.4371842285969	-0.262352044809513	0.757017339403589	-0.346560152791487	0.728921786114111	0.928990400229759
piRNAdb-piRNA_Match_Genome-rno-piR-37123	17.4371842285969	-0.262352044809513	0.757017339403589	-0.346560152791487	0.728921786114111	0.928990400229759
piRNAdb-piRNA_Match_Genome-rno-piR-23833	14.5282934527178	0.414686965333045	1.19960362883199	0.345686654630089	0.729578214720358	0.928990400229759
piRNAdb-piRNA_Match_Genome-rno-piR-60184	22.9285772316053	0.32361081479678	0.938085122668079	0.344969562971401	0.730117252977255	0.928990400229759
piRNAdb-piRNA_Match_Genome-rno-piR-38342	13.613134476793	-0.323636917930817	0.939394869890988	-0.344516377834141	0.730457981321553	0.928990400229759
piRNAdb-piRNA_Match_Genome-rno-piR-25384	29.2727102388704	-0.223862227334013	0.649833245264904	-0.344491804574812	0.730476458307328	0.928990400229759
piRNAdb-piRNA_Match_Genome-rno-piR-38062	32.2670352699333	0.266087209805543	0.775810474653814	0.34297965611289	0.731613764979899	0.928990400229759
piRNAdb-piRNA_Match_Genome-rno-piR-29143	25.357773253733	0.324098908345842	0.953029171114828	0.340072390404083	0.733802013244277	0.928990400229759
piRNAdb-piRNA_Match_Genome-rno-piR-7474	15.5064328665097	0.312378210513313	0.919372939037836	0.3397731184477	0.734027393188194	0.928990400229759
piRNAdb-piRNA_Match_Genome-rno-piR-32834	16.3653268306071	0.270613783678869	0.798075637972808	0.339082877365177	0.734547297031854	0.928990400229759
piRNAdb-piRNA_Match_Genome-rno-piR-46929	14.9270416970655	0.366397928039955	1.08062215463112	0.339062017625419	0.734563010914378	0.928990400229759
piRNAdb-piRNA_Match_Genome-rno-piR-39915	23.8075861376053	0.258621818350976	0.76283341359037	0.339027910607298	0.734588704363889	0.928990400229759
piRNAdb-piRNA_Match_Genome-rno-piR-6109	37.5223187985778	0.198243327677463	0.586183552327018	0.338193261974821	0.735217553193883	0.928990400229759
GtRNAdb-mature-tRNA_CCA_end_Unmatch_Genome-mature-tRNA-Pro-CGG_CCA_end	25.3015224900163	0.233533776340905	0.677106606506708	0.344899568394022	0.730169875093531	0.928990400229759
miRBase-miRNA_Match_Genome-rno-mir-1	26.492212060966	0.341931980163378	0.998359572553017	0.342493816420255	0.731979296722479	0.928990400229759
piRNAdb-piRNA_Match_Genome-rno-piR-28294	12.7450798656844	-0.344426389644695	1.02429945128007	-0.33625556395082	0.73667815571942	0.929951131934781
piRNAdb-piRNA_Match_Genome-rno-piR-37368	16.970076561604	-0.344158524752457	1.03168171594036	-0.333589826624738	0.738689096108894	0.931604102215206
piRNAdb-piRNA_Match_Genome-rno-piR-43706	33.143251425508	-0.193568175492898	0.582886176757122	-0.332085719667966	0.739824532894221	0.932150834614351
GtRNAdb-mature-tRNA_CCA_end_Match_Genome-mature-tRNA-Met-CAT_CCA_end	1907.03262121751	0.090327407620805	0.272978941070809	0.330895149884015	0.740723685636233	0.932399103815087
piRNAdb-piRNA_Match_Genome-rno-piR-22793	12.9152566870207	0.340106003180481	1.03157509556222	0.329695825969044	0.741629807959979	0.93253710033896
piRNAdb-piRNA_Match_Genome-rno-piR-24612	16.656459555241	0.293102528415835	0.893002786646187	0.328221292026006	0.742744350083296	0.93253710033896
miRBase-miRNA_Match_Genome-rno-mir-132	302.221010218975	0.109284392779887	0.333222130563388	0.327962589384796	0.742939948914623	0.93253710033896
piRNAdb-piRNA_Match_Genome-rno-piR-57624	15.2986763891916	0.294969312804535	0.912259053629285	0.323339419467578	0.746438203527124	0.934105522064524
piRNAdb-piRNA_Match_Genome-rno-piR-26510	12.7325539363531	0.296840169364434	0.925657507427158	0.320680345573487	0.748452643249105	0.934105522064524
piRNAdb-piRNA_Match_Genome-rno-piR-41537	17.5502659840355	-0.241220562960172	0.754633282933055	-0.319652695442498	0.749231623236966	0.934105522064524
piRNAdb-piRNA_Match_Genome-rno-piR-38077	24.4140142406592	-0.205823624593939	0.645667995002358	-0.318776253720284	0.749896186376114	0.934105522064524
piRNAdb-piRNA_Match_Genome-rno-piR-25307	22.9900561896117	-0.230342741812531	0.722865950871356	-0.318652084158717	0.749990353145199	0.934105522064524
piRNAdb-piRNA_Match_Genome-rno-piR-60457	21.7313508312693	0.233775317922242	0.734350448614162	0.318342990548197	0.75022477738883	0.934105522064524
piRNAdb-piRNA_Match_Genome-rno-piR-3360	35.2799793577354	-0.183202230791406	0.576191455608926	-0.317953744381363	0.75052002412865	0.934105522064524
miRBase-miRNA_Match_Genome-rno-mir-743b	9678.4248073709	0.11238397525178	0.350725799497767	0.320432586974529	0.748640425922549	0.934105522064524
miRBase-miRNA_Match_Genome-rno-mir-130b	42.3478333675157	0.188720121319078	0.59228100114002	0.318632745193295	0.7500050196183	0.934105522064524
piRNAdb-piRNA_Match_Genome-rno-piR-35608	59.969686187555	0.155208880492231	0.490689044570677	0.316308020750757	0.751768723781378	0.934783581630778
piRNAdb-piRNA_Match_Genome-rno-piR-38484	47.5260412452293	-0.163046144003097	0.518287493466314	-0.314586298258215	0.753075783754622	0.934787137261606
piRNAdb-piRNA_Match_Genome-rno-piR-21098	13.3776299153031	-0.299407453158903	0.952162792531622	-0.314449856166754	0.753179395233373	0.934787137261606
piRNAdb-piRNA_Match_Genome-rno-piR-8907	16.8055224478558	0.307067822325505	0.981310667301335	0.312916013814423	0.754344470854523	0.935358970396645
piRNAdb-piRNA_Match_Genome-rno-piR-31195	16.4200207607055	-0.31608697737196	1.02071070060459	-0.309673423806309	0.756809314674413	0.937539897283228
piRNAdb-piRNA_Match_Genome-rno-piR-2956	14.1150483165305	0.259203518750278	0.841286516408552	0.308103735998072	0.758003398512216	0.938144001140935
piRNAdb-piRNA_Match_Genome-rno-piR-11338	44.1939725201288	0.166672681639755	0.545367585636676	0.305615306133709	0.75989756513673	0.939310900344024
piRNAdb-piRNA_Match_Genome-rno-piR-27656	15.5461334992471	-0.768360520415097	2.51915739323896	-0.305006952911026	0.760360856829688	0.939310900344024
piRNAdb-piRNA_Match_Genome-rno-piR-53878	26.5454075712498	0.206485608583543	0.680118350124942	0.30360246646133	0.761430772266511	0.939758425250861
piRNAdb-piRNA_Match_Genome-rno-piR-15432	21.1506150250995	0.224401435114346	0.746726088389463	0.300513720631262	0.763785332254639	0.940915511348943
GtRNAdb-mature-tRNA_CCA_end_Unmatch_Genome-mature-tRNA-Asp-GTC_CCA_end	45465.2864647207	-0.09679251551062	0.322013558789899	-0.300585217201283	0.763730805410559	0.940915511348943
piRNAdb-piRNA_Match_Genome-rno-piR-17103	18.4513124314943	-0.227427521121247	0.760430499154481	-0.29907732708528	0.764881045351392	0.941206932802214
piRNAdb-piRNA_Match_Genome-rno-piR-62186	30.4105037686825	0.227803241082024	0.763877304481088	0.298219674476091	0.765535506543104	0.941206932802214
piRNAdb-piRNA_Match_Genome-rno-piR-19735	106.344705242187	0.119761709265293	0.403345548012214	0.296920865633719	0.766526925690405	0.941206932802214
piRNAdb-piRNA_Match_Genome-rno-piR-27281	17.3504489015337	0.233883124939621	0.79786666893372	0.293135600277908	0.769418506266707	0.941206932802214
piRNAdb-piRNA_Match_Genome-rno-piR-27569	85.5716998107112	0.145429945922866	0.49657091431245	0.29286843375478	0.769622717660167	0.941206932802214
piRNAdb-piRNA_Match_Genome-rno-piR-22135	37.574661947606	0.168195066363589	0.583096925280584	0.288451300412284	0.773001303544531	0.941206932802214
piRNAdb-piRNA_Match_Genome-rno-piR-43913	23.923975647149	0.197955781709437	0.68883376682374	0.287378161820122	0.773822780639138	0.941206932802214
piRNAdb-piRNA_Match_Genome-rno-piR-57163	21.4377441375398	-0.228889712815019	0.797176275392856	-0.287125595530575	0.774016154529602	0.941206932802214
piRNAdb-piRNA_Match_Genome-rno-piR-39031	16.1165740904667	-0.297197354628164	1.04472236712329	-0.284474960985583	0.776046419965836	0.941206932802214
piRNAdb-piRNA_Match_Genome-rno-piR-21428	14.9816551905579	-0.248369336124013	0.874530507474048	-0.284003055355257	0.776408039179337	0.941206932802214
piRNAdb-piRNA_Match_Genome-rno-piR-28513	56.2813056673651	0.138535278256366	0.495219620343772	0.279745132392367	0.779673049499432	0.941206932802214
piRNAdb-piRNA_Match_Genome-rno-piR-32948	56.2813056673651	0.138535278256366	0.495219620343772	0.279745132392367	0.779673049499432	0.941206932802214
piRNAdb-piRNA_Match_Genome-rno-piR-56235	43.8298426323059	0.177035255779235	0.634972593044879	0.278807711889264	0.780392395819743	0.941206932802214
piRNAdb-piRNA_Match_Genome-rno-piR-29292	30.1724244103267	-0.220966802500557	0.795342394268605	-0.277826008135474	0.781145925238024	0.941206932802214
piRNAdb-piRNA_Match_Genome-rno-piR-945	13.3722639538146	-0.262279990642491	0.945259459750108	-0.277468781652635	0.781420173727374	0.941206932802214
piRNAdb-piRNA_Match_Genome-rno-piR-26860	15.9735489022417	0.225088112221038	0.813880882821518	0.276561493176636	0.782116835740944	0.941206932802214
piRNAdb-piRNA_Match_Genome-rno-piR-24285	31.5196734860614	-0.163945288346898	0.597717457243445	-0.274285594907971	0.783865153773387	0.941206932802214
piRNAdb-piRNA_Match_Genome-rno-piR-41807	24.6401777515365	-0.176416186933928	0.643992055972587	-0.273941557660204	0.784129534297969	0.941206932802214
piRNAdb-piRNA_Match_Genome-rno-piR-43868	14.3996034664444	-0.267009487777715	0.97686811944896	-0.273332175000584	0.784597884577754	0.941206932802214
piRNAdb-piRNA_Match_Genome-rno-piR-20070	25.7977896218269	-0.188430379546665	0.692698579712058	-0.272023626243021	0.78560385298519	0.941206932802214
piRNAdb-piRNA_Match_Genome-rno-piR-19711	31.9814494168522	-0.18563015966426	0.692428263986857	-0.268085763275231	0.78863330412604	0.941206932802214
piRNAdb-piRNA_Match_Genome-rno-piR-17565	28.6706809904383	-0.180886570991954	0.675056658172408	-0.267957613338221	0.788731945599381	0.941206932802214
piRNAdb-piRNA_Match_Genome-rno-piR-1476	33.9396011337153	0.179206845145546	0.670663883196055	0.267208134559945	0.789308913325522	0.941206932802214
piRNAdb-piRNA_Match_Genome-rno-piR-14022	14.8299874587219	0.235759881875971	0.888126269677119	0.265457615572707	0.790656956764411	0.941206932802214
piRNAdb-piRNA_Match_Genome-rno-piR-19768	32.6870723117077	-0.15416540104566	0.584316324575688	-0.263838942301689	0.791904025810916	0.941206932802214
piRNAdb-piRNA_Match_Genome-rno-piR-4205	13.6092810242872	-0.252209627875746	0.958309721054409	-0.263181748379057	0.792410497748871	0.941206932802214
piRNAdb-piRNA_Match_Genome-rno-piR-24652	18.0688430440344	-0.222273995117413	0.847429115248124	-0.262292138797157	0.793096222260384	0.941206932802214
piRNAdb-piRNA_Match_Genome-rno-piR-24356	37.0388616645295	-0.170088673238945	0.649302063560921	-0.261956156901982	0.793355243841665	0.941206932802214
piRNAdb-piRNA_Match_Genome-rno-piR-2796	25.7078203470821	0.182639028312547	0.706809623299757	0.258399181748392	0.796098848031549	0.941206932802214
piRNAdb-piRNA_Match_Genome-rno-piR-38280	15.9506528926617	-0.206180623644219	0.798318849667767	-0.25826851480461	0.796199683698314	0.941206932802214
piRNAdb-piRNA_Match_Genome-rno-piR-23691	34.6511381064208	0.149227797993505	0.58117699442567	0.256768246893487	0.797357683723765	0.941206932802214
piRNAdb-piRNA_Match_Genome-rno-piR-27032	22.3073724254277	-0.203854226132323	0.796344792845683	-0.255987391345731	0.797960573269406	0.941206932802214
piRNAdb-piRNA_Match_Genome-rno-piR-13452	14.6696392223412	-0.276715276446431	1.0973858630872	-0.252158594122917	0.800918481222874	0.941206932802214
piRNAdb-piRNA_Match_Genome-rno-piR-49552	13.387014212035	0.215982864040474	0.861937811261539	0.250578244994682	0.802140203173515	0.941206932802214
piRNAdb-piRNA_Match_Genome-rno-piR-26815	99.053012395407	0.100873106053762	0.403906641400126	0.249743618238336	0.802785624292126	0.941206932802214
piRNAdb-piRNA_Match_Genome-rno-piR-33899	39.1528302076691	0.137852944557784	0.552278687752189	0.249607576057036	0.802890839167267	0.941206932802214
piRNAdb-piRNA_Match_Genome-rno-piR-12696	62.3249749443868	0.130711458078298	0.531721791666477	0.24582678409443	0.805816322442258	0.941206932802214
piRNAdb-piRNA_Match_Genome-rno-piR-7594	26.0030325649217	-0.170160982347509	0.692609289472087	-0.245681057031747	0.805929137135549	0.941206932802214
piRNAdb-piRNA_Match_Genome-rno-piR-24517	33.1426292886247	0.148117879196583	0.60577994577645	0.244507729629007	0.806837616240479	0.941206932802214
piRNAdb-piRNA_Match_Genome-rno-piR-41691	14.9866770926396	-0.240469895876178	0.985026560646144	-0.244125291117468	0.807133785540161	0.941206932802214
piRNAdb-piRNA_Match_Genome-rno-piR-11101	17.0383993261774	-0.230853348316654	0.948683090479422	-0.243340848628377	0.807741362578376	0.941206932802214
piRNAdb-piRNA_Match_Genome-rno-piR-8605	12.6972934715499	0.221634355173062	0.911576145854826	0.243133122977045	0.807902272506395	0.941206932802214
piRNAdb-piRNA_Match_Genome-rno-piR-36983	65.3502217076599	0.118618649832819	0.489005612724476	0.242571141815612	0.808337639084552	0.941206932802214
piRNAdb-piRNA_Match_Genome-rno-piR-46045	48.4925908507941	-0.122893400293752	0.507144825962424	-0.242324073918203	0.808529061275187	0.941206932802214
piRNAdb-piRNA_Match_Genome-rno-piR-6095	26.9889440814627	-0.181770855908479	0.754311422529363	-0.240975876116211	0.809573813717389	0.941206932802214
piRNAdb-piRNA_Match_Genome-rno-piR-14891	57.4524111983137	-0.128085336256174	0.535817164276967	-0.239046721149764	0.811069354479612	0.941206932802214
piRNAdb-piRNA_Match_Genome-rno-piR-29083	26.9940518359004	0.174733039869952	0.732492717093261	0.238545770889494	0.811457819694641	0.941206932802214
piRNAdb-piRNA_Match_Genome-rno-piR-29629	16.624368201573	-0.212119505098387	0.890828346304353	-0.238114902807455	0.811791976357816	0.941206932802214
piRNAdb-piRNA_Match_Genome-rno-piR-24963	14.0285008356321	0.212882950009612	0.907436454277083	0.234598190326404	0.814520614269512	0.941206932802214
piRNAdb-piRNA_Match_Genome-rno-piR-35802	29.2200887181076	0.150446056016901	0.654302230894656	0.229933582545163	0.818143380269687	0.941206932802214
piRNAdb-piRNA_Match_Genome-rno-piR-967	16.0707616496832	0.250413342890867	1.09322837960631	0.229058582417194	0.81882338409513	0.941206932802214
piRNAdb-piRNA_Match_Genome-rno-piR-31796	14.092662180209	0.224909161719961	0.986882074120328	0.227898720240143	0.819724977647451	0.941206932802214
piRNAdb-piRNA_Match_Genome-rno-piR-31586	31.888230924275	0.134323629289254	0.597716071965667	0.224728153699319	0.822190761267317	0.941206932802214
piRNAdb-piRNA_Match_Genome-rno-piR-15191	14.7359997854797	0.1801754875638	0.81206590197745	0.221872987309351	0.824412759451108	0.941206932802214
piRNAdb-piRNA_Match_Genome-rno-piR-13736	13.3235853299975	-0.192926994930849	0.874082640705229	-0.220719398768967	0.825310925916662	0.941206932802214
piRNAdb-piRNA_Match_Genome-rno-piR-23386	36.041935536668	-0.152376758667066	0.692130194233659	-0.220156207512058	0.825749501209721	0.941206932802214
piRNAdb-piRNA_Match_Genome-rno-piR-17056	25.0692763858811	0.158447437569478	0.720467333352953	0.219923139099292	0.825931015056898	0.941206932802214
piRNAdb-piRNA_Match_Genome-rno-piR-37253	14.359904179223	-0.191659617409728	0.8752706911232	-0.218971821350237	0.826671998396145	0.941206932802214
piRNAdb-piRNA_Match_Genome-rno-piR-5627	17.1825027546958	-0.163927759542909	0.75397164485336	-0.217418997997984	0.827881827030199	0.941206932802214
piRNAdb-piRNA_Match_Genome-rno-piR-59496	14.695802155958	0.17627173634512	0.810972161555562	0.217358553969356	0.827928928183994	0.941206932802214
piRNAdb-piRNA_Match_Genome-rno-piR-18762	14.4434382818232	-0.189518447324034	0.872222022629925	-0.21728234601621	0.827988314295582	0.941206932802214
piRNAdb-piRNA_Match_Genome-rno-piR-42203	16.0357154086382	-0.170310533578598	0.786987035736787	-0.216408308961724	0.828669490107553	0.941206932802214
piRNAdb-piRNA_Match_Genome-rno-piR-36806	213.356907163751	-0.0731798348869172	0.339987846652395	-0.215242502364317	0.829578255325945	0.941206932802214
piRNAdb-piRNA_Match_Genome-rno-piR-18617	50.3472843156881	-0.110036987237696	0.511793381686105	-0.215002755360334	0.829765170329972	0.941206932802214
piRNAdb-piRNA_Match_Genome-rno-piR-41474	50.3472843156881	-0.110036987237696	0.511793381686105	-0.215002755360334	0.829765170329972	0.941206932802214
piRNAdb-piRNA_Match_Genome-rno-piR-10143	24.3040352761411	-0.162582419620939	0.760655422260698	-0.213739907536236	0.830749888696052	0.941206932802214
piRNAdb-piRNA_Match_Genome-rno-piR-755	12.5145592072118	-0.204723246005587	0.958695685475392	-0.213543514492892	0.830903052081433	0.941206932802214
piRNAdb-piRNA_Match_Genome-rno-piR-20284	16.9797765351123	-0.217562614241324	1.01929773683505	-0.213443635141253	0.830980948647274	0.941206932802214
piRNAdb-piRNA_Match_Genome-rno-piR-44045	16.2999003411589	0.180011346890184	0.853081191821166	0.211013146950168	0.832877012547996	0.941206932802214
piRNAdb-piRNA_Match_Genome-rno-piR-36399	17.985809608327	0.16212129572455	0.768348305384788	0.210999743981161	0.832887471131586	0.941206932802214
piRNAdb-piRNA_Match_Genome-rno-piR-24394	29.9477711092564	0.14214720513133	0.679012110535711	0.209344138235151	0.834179597704629	0.941206932802214
piRNAdb-piRNA_Match_Genome-rno-piR-30392	14.4107633708358	-0.193250556491011	0.924436122787328	-0.209046954924617	0.834411583562203	0.941206932802214
piRNAdb-piRNA_Match_Genome-rno-piR-6042	21.554723177675	-0.168096003417406	0.806058268133808	-0.208540759474601	0.834806760678189	0.941206932802214
piRNAdb-piRNA_Match_Genome-rno-piR-40028	12.4485298237378	0.22540323335549	1.08625670733686	0.207504572200161	0.835615822282699	0.941206932802214
piRNAdb-piRNA_Match_Genome-rno-piR-21579	27.7815989775354	-0.145628694442984	0.704570489298798	-0.206691447704426	0.836250836924915	0.941206932802214
piRNAdb-piRNA_Match_Genome-rno-piR-43219	14.6847452214256	0.175601039683834	0.850143754951117	0.206554525233125	0.836357777892784	0.941206932802214
piRNAdb-piRNA_Match_Genome-rno-piR-13043	22.1182140533068	-0.151870884736744	0.735958824671304	-0.206357855420204	0.836511388797519	0.941206932802214
piRNAdb-piRNA_Match_Genome-rno-piR-10440	13.1974584918246	0.181394457772694	0.885657534930253	0.204813317358587	0.837717981829261	0.941206932802214
piRNAdb-piRNA_Match_Genome-rno-piR-23085	16.3983789083365	0.168099416891649	0.826341126320417	0.203426177806462	0.838801940619037	0.941206932802214
piRNAdb-piRNA_Match_Genome-rno-piR-6159	15.9679283514964	0.188795195208887	0.933374879348106	0.202271562462391	0.839704430334098	0.941206932802214
miRBase-miRNA_Match_Genome-rno-mir-499	280.900279906307	0.112962031362625	0.392651432456519	0.287690358483881	0.773583770974233	0.941206932802214
miRBase-miRNA_Match_Genome-rno-mir-3585	938.808985194378	-0.100997947403723	0.35245608753844	-0.286554697094592	0.77445330668821	0.941206932802214
GtRNAdb-mature-tRNA_Unmatch_Genome-mature-tRNA-Trp-CCA	7408.06104471624	-0.0832742917521401	0.291200660429524	-0.285968759924203	0.77490204877766	0.941206932802214
miRBase-miRNA_Match_Genome-rno-mir-3074	13.50988609867	-0.258946413971778	0.928769289089743	-0.278805960762939	0.780393739753855	0.941206932802214
miRBase-miRNA_Match_Genome-rno-mir-509	267.203316640238	0.119526036890206	0.430410450319187	0.277702450768952	0.781240779128972	0.941206932802214
miRBase-miRNA_Match_Genome-rno-mir-31a	497.630451328345	-0.10428517229542	0.377710193034212	-0.276098379706619	0.782472505131768	0.941206932802214
miRBase-miRNA_Match_Genome-rno-mir-935	19.6392895903559	-0.227610573026811	0.854893093416708	-0.266244486918395	0.790050923429075	0.941206932802214
miRBase-miRNA_Match_Genome-rno-mir-9a-3	1063.71912009906	-0.100360856859948	0.380899190098515	-0.263484038477455	0.792177524488539	0.941206932802214
GtRNAdb-mature-tRNA_Match_Genome-mature-tRNA-Asp-GTC	23912.4596756118	0.0686647897457863	0.26431870969183	0.259780285042413	0.795033259246287	0.941206932802214
GtRNAdb-mature-tRNA_CCA_end_Unmatch_Genome-mature-tRNA-Pro-TGG_CCA_end	51.9395348002142	0.137602535078266	0.549503548085999	0.250412459678477	0.802268395073647	0.941206932802214
miRBase-miRNA_Match_Genome-rno-mir-485	18.339269659652	-0.199144590427224	0.805622841375678	-0.247193326950817	0.804758609412122	0.941206932802214
GtRNAdb-mature-tRNA_Match_Genome-mature-tRNA-Thr-AGT	871.872738979262	0.0950005284194252	0.385428203166001	0.246480479734145	0.805310313325815	0.941206932802214
miRBase-miRNA_Match_Genome-rno-mir-19b-1	357.08564829267	0.0819783774888591	0.347929796351257	0.235617582479475	0.813729428695094	0.941206932802214
GtRNAdb-mature-tRNA_3_end_Match_Genome-mature-tRNA-Asp-GTC_3_end	1340.17471762778	0.0810994731873168	0.346825822306201	0.233833434454361	0.81511429207804	0.941206932802214
GtRNAdb-mature-tRNA_5_end_Match_Genome-mature-tRNA-Thr-CGT_5_end	28.3982326267515	0.173518649609977	0.767850133683265	0.225979839031392	0.821217100883027	0.941206932802214
GtRNAdb-mature-tRNA_Unmatch_Genome-mature-tRNA-Pro-TGG	60.7873021451138	0.111103862414852	0.50679622009467	0.219227882942965	0.826472536287979	0.941206932802214
GtRNAdb-mature-tRNA_5_end_Match_Genome-mature-tRNA-Pro-TGG_5_end	150.045414600762	-0.0906126210492563	0.413574454671668	-0.219096271604088	0.826575055048928	0.941206932802214
miRBase-miRNA_Match_Genome-rno-mir-547	646.039373163066	-0.0799826941759588	0.365563263617994	-0.218793030197747	0.826811276442237	0.941206932802214
miRBase-miRNA_Match_Genome-rno-mir-124-1	70.4765981611832	0.0961620153957005	0.440713681903979	0.218196119939503	0.827276308095333	0.941206932802214
miRBase-miRNA_Match_Genome-rno-mir-124-2	70.4765981611832	0.0961620153957005	0.440713681903979	0.218196119939503	0.827276308095333	0.941206932802214
miRBase-miRNA_Match_Genome-rno-mir-124-3	70.4765981611832	0.0961620153957005	0.440713681903979	0.218196119939503	0.827276308095333	0.941206932802214
miRBase-miRNA_Match_Genome-rno-mir-17-2	80.0636864146409	-0.0974181628443418	0.446649755857887	-0.218108622173607	0.82734447960147	0.941206932802214
GtRNAdb-mature-tRNA_Match_Genome-mature-tRNA-Gly-CCC	112202.240664364	-0.0608941346065887	0.288321315058401	-0.211202333737463	0.832729389769443	0.941206932802214
rRNAdb-rRNA_Match_Genome-18S-rRNA	137478.698128488	-0.544394529208682	2.63546072663647	-0.206565221673202	0.836349423511218	0.941206932802214
miRBase-miRNA_Match_Genome-rno-mir-9a-2	1082.59262673063	-0.0782571592089222	0.382523729050822	-0.204581188735941	0.837899353759932	0.941206932802214
GtRNAdb-mature-tRNA_5_end_Match_Genome-mature-tRNA-Arg-ACG_5_end	687.725233338757	-0.0894109160119162	0.437202181149364	-0.204507021847108	0.837957305309552	0.941206932802214
miRBase-miRNA_Match_Genome-rno-mir-147	43.3906588359058	0.132229323406817	0.654353506283779	0.202076281607746	0.839857089887518	0.941206932802214
piRNAdb-piRNA_Match_Genome-rno-piR-14354	15.706990328586	0.20360846066163	1.01507089102428	0.200585459066977	0.841022728972317	0.941718536319761
piRNAdb-piRNA_Match_Genome-rno-piR-2411	46.4142724939314	0.0988299698201249	0.515461235838767	0.191731138927076	0.847952813140503	0.944862604680554
piRNAdb-piRNA_Match_Genome-rno-piR-3258	13.3535702508791	-0.223881078523475	1.17012561209688	-0.191330807743177	0.848266425828971	0.944862604680554
piRNAdb-piRNA_Match_Genome-rno-piR-27426	29.8309270617789	-0.133164497795138	0.701088074415742	-0.189939756008704	0.849356338711596	0.944862604680554
piRNAdb-piRNA_Match_Genome-rno-piR-30621	27.5639509029163	0.130558662966065	0.687693297894506	0.189850131396938	0.849426571029168	0.944862604680554
piRNAdb-piRNA_Match_Genome-rno-piR-29304	23.7106248431534	0.128034172030539	0.678302834021284	0.188756652056862	0.850283547667845	0.944862604680554
piRNAdb-piRNA_Match_Genome-rno-piR-23420	14.7859150944044	-0.174330126143169	0.924846025817383	-0.188496378074497	0.850487554506897	0.944862604680554
piRNAdb-piRNA_Match_Genome-rno-piR-2716	12.7722795125646	-0.22966194757909	1.22950517119943	-0.186792177014632	0.851823580802798	0.944862604680554
piRNAdb-piRNA_Match_Genome-rno-piR-4799	16.5659495311296	0.145212486140489	0.778947967405742	0.186421291558298	0.852114396835459	0.944862604680554
piRNAdb-piRNA_Match_Genome-rno-piR-9018	14.0433158368952	0.167200399226934	0.898727393742472	0.186041285033807	0.852412385669893	0.944862604680554
piRNAdb-piRNA_Match_Genome-rno-piR-54410	30.6403794048419	-0.302391164849428	1.62736401899957	-0.185816548306951	0.852588626864106	0.944862604680554
piRNAdb-piRNA_Match_Genome-rno-piR-14645	14.8899602648408	0.16544025554022	0.891447462799862	0.185586097267701	0.85276935693252	0.944862604680554
piRNAdb-piRNA_Match_Genome-rno-piR-11748	16.8054374381304	-0.16265901311146	0.878335864610859	-0.185189993560749	0.853080017328301	0.944862604680554
miRBase-miRNA_Match_Genome-rno-mir-9a-1	1081.11004461078	-0.074402542780091	0.381830901504487	-0.19485731114724	0.845504654296132	0.944862604680554
piRNAdb-piRNA_Match_Genome-rno-piR-36844	30.7768780302443	0.111958763965445	0.610630867291936	0.183349335846657	0.854523926037039	0.945673144814323
piRNAdb-piRNA_Match_Genome-rno-piR-17026	17.6442415689168	0.152230514029633	0.872421653569538	0.174491902403817	0.861478894094527	0.951271266054487
piRNAdb-piRNA_Match_Genome-rno-piR-45836	19.5324700150978	-0.143366501389156	0.823169794643374	-0.174163948096841	0.861736617727544	0.951271266054487
piRNAdb-piRNA_Match_Genome-rno-piR-27649	49.5161002447322	0.133914142766506	0.770141125842153	0.173882601867379	0.861957726030087	0.951271266054487
piRNAdb-piRNA_Match_Genome-rno-piR-942	20.1584850221613	-0.1803252518876	1.04457860729799	-0.172629661978285	0.862942535036686	0.951271266054487
piRNAdb-piRNA_Match_Genome-rno-piR-26889	14.1268818145469	-0.162822814644919	0.947595728601223	-0.1718272990585	0.863573303160287	0.951271266054487
piRNAdb-piRNA_Match_Genome-rno-piR-61266	24.0599188511265	0.131036600133215	0.768885500646169	0.170424074876028	0.86467664007164	0.951271266054487
piRNAdb-piRNA_Match_Genome-rno-piR-9197	53.1064129105071	0.0873154336202916	0.519125922392918	0.168197020903541	0.866428284533695	0.951271266054487
piRNAdb-piRNA_Match_Genome-rno-piR-54062	14.5429221677399	-0.147094721174931	0.883555560902308	-0.166480442978271	0.86777887264159	0.951271266054487
piRNAdb-piRNA_Match_Genome-rno-piR-49772	12.5738914277747	-0.145539303067416	0.87765034461555	-0.165828343782134	0.868292039822388	0.951271266054487
piRNAdb-piRNA_Match_Genome-rno-piR-36927	14.5104584686165	0.135320292072192	0.822340540048337	0.164555054119352	0.869294210444848	0.951271266054487
piRNAdb-piRNA_Match_Genome-rno-piR-5100	15.8849994056892	-0.129473632996385	0.793135222072439	-0.163242823409196	0.870327250192923	0.951271266054487
miRBase-miRNA_Match_Genome-rno-mir-19b-2	386.288561730181	0.0586206337097041	0.350105085279465	0.167437252911969	0.867026015306987	0.951271266054487
miRBase-miRNA_Match_Genome-rno-mir-3580	5194.26069639105	-0.0527372113458119	0.315861881097071	-0.166962886318038	0.867399251384227	0.951271266054487
miRBase-miRNA_Match_Genome-rno-mir-466b-2	16.4429856483649	0.135993373995234	0.829784685998731	0.163889953972279	0.869817775734662	0.951271266054487
miRBase-miRNA_Match_Genome-rno-mir-466b-4	16.4429856483649	0.135993373995234	0.829784685998731	0.163889953972279	0.869817775734662	0.951271266054487
piRNAdb-piRNA_Match_Genome-rno-piR-1019	26.7951821390321	0.120347604602456	0.753345164439332	0.159750948546969	0.873077265099513	0.95327945433887
piRNAdb-piRNA_Match_Genome-rno-piR-35634	32.5393574111362	-0.116925906770456	0.734980272059005	-0.159087136370198	0.873600222839161	0.95327945433887
piRNAdb-piRNA_Match_Genome-rno-piR-10438	18.9605011870724	0.112434248025751	0.73481020493769	0.153011277293414	0.878389382022667	0.957070317831598
piRNAdb-piRNA_Match_Genome-rno-piR-29713	45.2926545409485	-0.0822195001398846	0.540723555867223	-0.152054592864961	0.879143877322144	0.957070317831598
GtRNAdb-mature-tRNA_Unmatch_Genome-mature-tRNA-Leu-CAG	12424.9571854381	0.0532826209032088	0.350687916929693	0.151937430207757	0.879236285959751	0.957070317831598
piRNAdb-piRNA_Match_Genome-rno-piR-9068	19.0871299019796	-0.115596927070938	0.765525199798777	-0.151003424970626	0.87997301414522	0.95708776640856
piRNAdb-piRNA_Match_Genome-rno-piR-15428	20.4800890118357	0.118859733685029	0.823923886878142	0.14426057500941	0.885294709184325	0.962013510492572
piRNAdb-piRNA_Match_Genome-rno-piR-50694	24.79985551859	0.146832043729935	1.02372013157115	0.143429868380711	0.885950695280434	0.962013510492572
piRNAdb-piRNA_Match_Genome-rno-piR-36698	18.341676168243	0.103584860751591	0.747436551941472	0.138586827848502	0.889776652712514	0.965141851518051
piRNAdb-piRNA_Match_Genome-rno-piR-3375	12.2620388243218	0.124189863330636	0.905852730775005	0.137097189323904	0.890953974087142	0.965141851518051
piRNAdb-piRNA_Match_Genome-rno-piR-36236	22.054351184282	0.103520943275036	0.763958471410615	0.1355059825227	0.892211834516245	0.965141851518051
piRNAdb-piRNA_Match_Genome-rno-piR-17805	23.0301545147561	0.112460336772713	0.831898748990975	0.135185125484463	0.892465507277234	0.965141851518051
miRBase-miRNA_Match_Genome-rno-mir-92b	28.7636485131827	0.106567749163348	0.788013506698907	0.135235942350499	0.892425330224262	0.965141851518051
piRNAdb-piRNA_Match_Genome-rno-piR-28665	17.8911423033686	-0.0989775509294941	0.770227645703913	-0.128504282443716	0.897749909423942	0.969703092876385
piRNAdb-piRNA_Match_Genome-rno-piR-21855	24.4651592186186	0.0953320964210772	0.744743072541906	0.128006691080316	0.898143677890025	0.969703092876385
piRNAdb-piRNA_Match_Genome-rno-piR-18945	21.6735823535279	0.10498076698217	0.842623872840824	0.124587933437297	0.90084978168238	0.971834695429894
piRNAdb-piRNA_Match_Genome-rno-piR-35211	61.8738164239925	0.056465307824487	0.466374531216298	0.121072880367687	0.903633309463026	0.973513579882864
piRNAdb-piRNA_Match_Genome-rno-piR-34758	17.2171291555199	0.0920050368382291	0.761812003292622	0.120771314235763	0.903872171683412	0.973513579882864
piRNAdb-piRNA_Match_Genome-rno-piR-40812	17.9196223214841	0.0906150749354731	0.757468838043327	0.119628782577443	0.904777218252567	0.973698659513297
piRNAdb-piRNA_Match_Genome-rno-piR-47626	44.9356331367777	0.0689981826057832	0.591776124569716	0.116595076653274	0.907180939376027	0.974795906495449
piRNAdb-piRNA_Match_Genome-rno-piR-28278	22.0988328467459	-0.0840498622638157	0.721525088103057	-0.116489175012319	0.907264864780403	0.974795906495449
piRNAdb-piRNA_Match_Genome-rno-piR-27045	32.967992759609	0.0657192843626491	0.572113693873676	0.114871021383313	0.90854735460145	0.975384710517967
piRNAdb-piRNA_Match_Genome-rno-piR-11698	12.5370003798189	0.12706601896386	1.12713274160159	0.112733854916951	0.910241559988257	0.975481709853592
piRNAdb-piRNA_Match_Genome-rno-piR-36256	177.097561486174	-0.0389760542133413	0.347137407982227	-0.112278461834159	0.910602618773542	0.975481709853592
piRNAdb-piRNA_Match_Genome-rno-piR-25796	57.0256779301054	0.06553766255587	0.58527599644574	0.111977362738036	0.910841355586186	0.975481709853592
piRNAdb-piRNA_Match_Genome-rno-piR-36548	22.330288033484	-0.0848565292660148	0.764731200319804	-0.110962556818041	0.911646038650024	0.975556760134756
piRNAdb-piRNA_Match_Genome-rno-piR-26623	161.440541010973	-0.045053377581638	0.413638546205799	-0.108919678774865	0.913266198099429	0.975588048152446
piRNAdb-piRNA_Match_Genome-rno-piR-1022	16.6990844277546	0.116825636656217	1.10625983296213	0.105604156614277	0.915896426694901	0.975588048152446
piRNAdb-piRNA_Match_Genome-rno-piR-33288	23.3344039318381	-0.0731668908359566	0.69379774197063	-0.105458531225738	0.916011973733378	0.975588048152446
piRNAdb-piRNA_Match_Genome-rno-piR-32650	20.5299098705008	-0.0842988105348818	0.802920203455654	-0.104990271974814	0.916383527896203	0.975588048152446
piRNAdb-piRNA_Match_Genome-rno-piR-5203	35.3539483830389	-0.0595480232604969	0.569643875612333	-0.104535527914675	0.916744375515397	0.975588048152446
piRNAdb-piRNA_Match_Genome-rno-piR-17642	17.0972692674456	-0.0811237957720762	0.780561792293914	-0.103930011144498	0.91722489061666	0.975588048152446
piRNAdb-piRNA_Match_Genome-rno-piR-26397	27.4939390648721	0.0675911264292446	0.664309812871246	0.101746391698033	0.918957977942631	0.975588048152446
piRNAdb-piRNA_Match_Genome-rno-piR-61877	21.6340799910735	-0.0789826473434923	0.787822059237273	-0.100254424736417	0.920142338923127	0.975588048152446
piRNAdb-piRNA_Match_Genome-rno-piR-46082	81.7910450388534	-0.0503492494136809	0.509131592251068	-0.0988924085246162	0.92122369647988	0.975588048152446
piRNAdb-piRNA_Match_Genome-rno-piR-1214	13.331225408367	0.106027477418388	1.07994664060325	0.0981784408895998	0.921790601424536	0.975588048152446
piRNAdb-piRNA_Match_Genome-rno-piR-23367	15.5263011661147	0.093831412467309	0.957805528565479	0.097964993590966	0.921960090686235	0.975588048152446
miRBase-miRNA_Match_Genome-rno-mir-871	2453.75580246273	0.0438300787446653	0.406763260485	0.107753287974939	0.914191397856847	0.975588048152446
miRBase-miRNA_Match_Genome-rno-mir-878	2100.11771252641	-0.0396730765659059	0.389371366102229	-0.101890072100191	0.918843930266361	0.975588048152446
GtRNAdb-mature-tRNA_5_end_Match_Genome-mature-tRNA-Pro-AGG_5_end	188.793784212937	-0.0381745891104795	0.382271080494056	-0.0998626133610259	0.920453398147514	0.975588048152446
piRNAdb-piRNA_Match_Genome-rno-piR-35753	102.001211564407	0.0384053982466377	0.404172066604953	0.095022396201804	0.924297037811787	0.97659445143227
piRNAdb-piRNA_Match_Genome-rno-piR-62402	34.2694006217257	0.0590136548202278	0.621749412681728	0.0949154974922941	0.924381946875274	0.97659445143227
piRNAdb-piRNA_Match_Genome-rno-piR-19259	33.2146099041303	-0.0529667251625743	0.586930936684684	-0.0902435394899444	0.928093685943469	0.979557982009199
piRNAdb-piRNA_Match_Genome-rno-piR-16637	19.0944169633121	0.0652245667173882	0.728537893799288	0.0895280359093546	0.928662273606613	0.979557982009199
piRNAdb-piRNA_Match_Genome-rno-piR-39535	36.6334345239042	-0.056094506644737	0.642751369397398	-0.0872724809553149	0.930454927558006	0.98066995539447
piRNAdb-piRNA_Match_Genome-rno-piR-34727	103.221829136418	0.0403071200819401	0.466973921735635	0.0863155696834799	0.931215561850299	0.980693311766215
piRNAdb-piRNA_Match_Genome-rno-piR-34761	15.7234796746304	-0.0794931056989931	0.941934791255491	-0.0843934276947537	0.93274363258595	0.981422967936418
piRNAdb-piRNA_Match_Genome-rno-piR-11324	28.5366748479842	0.0525425752499445	0.641087298636139	0.0819585341368087	0.934679687440363	0.981422967936418
piRNAdb-piRNA_Match_Genome-rno-piR-13951	18.3341250956955	0.0628749593532289	0.768254850540212	0.0818412787228318	0.934772930481545	0.981422967936418
piRNAdb-piRNA_Match_Genome-rno-piR-30886	12.5981196017768	-0.0909617398554673	1.1130068123294	-0.0817261303774903	0.934864498824976	0.981422967936418
piRNAdb-piRNA_Match_Genome-rno-piR-7975	19.6527063376251	-0.07608284261059	0.951486422333871	-0.0799620896575369	0.936267407455545	0.98211936579855
piRNAdb-piRNA_Match_Genome-rno-piR-26114	12.3840628228671	0.0731449525948074	0.935469540601024	0.0781906298603939	0.937676415486849	0.982586882596635
piRNAdb-piRNA_Match_Genome-rno-piR-36435	55.4722232649347	0.0418519879025312	0.559173192441066	0.0748461987596841	0.940337083581763	0.982586882596635
piRNAdb-piRNA_Match_Genome-rno-piR-60289	14.2777141078095	0.069826545537556	0.951300801565182	0.0734011213095478	0.94148692532827	0.982586882596635
piRNAdb-piRNA_Match_Genome-rno-piR-28913	26.3907676133885	-0.0559665465349012	0.763377534391177	-0.0733143746226914	0.941555953188441	0.982586882596635
piRNAdb-piRNA_Match_Genome-rno-piR-57046	62.4953374800491	0.0412137429385836	0.563401779135967	0.0731516023996038	0.941685478838322	0.982586882596635
piRNAdb-piRNA_Match_Genome-rno-piR-26834	18.3820486814657	-0.0611518806674785	0.854070054970369	-0.071600544137565	0.942919807029497	0.982586882596635
piRNAdb-piRNA_Match_Genome-rno-piR-2925	23.5561290980209	0.0562450026301553	0.806189745477393	0.0697664575190662	0.944379545122462	0.982586882596635
piRNAdb-piRNA_Match_Genome-rno-piR-43584	14.2388885276813	0.0580981085520806	0.838846993806665	0.0692594823382903	0.944783076666009	0.982586882596635
piRNAdb-piRNA_Match_Genome-rno-piR-27256	16.0518233909563	-0.0626599611112735	0.926367152372117	-0.0676405256283346	0.946071794468757	0.982586882596635
piRNAdb-piRNA_Match_Genome-rno-piR-6624	39.4836186084465	0.0365855695318531	0.549790832054076	0.0665445245697633	0.946944310761405	0.982586882596635
piRNAdb-piRNA_Match_Genome-rno-piR-5098	32.6800998760109	-0.0419789530095905	0.63321406787753	-0.0662950416599234	0.947142930724603	0.982586882596635
piRNAdb-piRNA_Match_Genome-rno-piR-61301	17.6642197878094	-0.0531042274331832	0.804912271747352	-0.0659751743104889	0.947397590411765	0.982586882596635
piRNAdb-piRNA_Match_Genome-rno-piR-35610	34.7750805220368	-0.037509844606484	0.570800158782227	-0.0657144957466539	0.947605131423184	0.982586882596635
piRNAdb-piRNA_Match_Genome-rno-piR-8519	12.5903300430013	0.0738469852129534	1.17085464204251	0.0630710103212559	0.949709958736582	0.982586882596635
piRNAdb-piRNA_Match_Genome-rno-piR-7628	19.1107870962872	-0.0518421774339547	0.827258042774854	-0.0626674807053692	0.950031293113011	0.982586882596635
miRBase-miRNA_Match_Genome-rno-mir-136	12.9866852357807	0.0911852955648524	1.19383709904602	0.0763800150269394	0.93911676885154	0.982586882596635
GtRNAdb-mature-tRNA_Match_Genome-mature-tRNA-Gly-GCC	836296.309576478	0.0186841723557332	0.29046104171788	0.0643259152595096	0.948710718789368	0.982586882596635
miRBase-miRNA_Match_Genome-rno-mir-17-1	76.1175131266422	-0.0309141004076736	0.482122042821	-0.0641209023067863	0.948873958458499	0.982586882596635
piRNAdb-piRNA_Match_Genome-rno-piR-29265	22.7174961429735	-0.0485982059436468	0.81697682176847	-0.0594854158021872	0.952565481410276	0.984290814402779
piRNAdb-piRNA_Match_Genome-rno-piR-43906	16.6080767411082	0.0463652940225507	0.802069806024296	0.0578070557877928	0.953902317873777	0.984290814402779
miRBase-miRNA_Match_Genome-rno-mir-19a	82.6910763022841	-0.0275519036538676	0.473487232609267	-0.0581893275179483	0.953597821725607	0.984290814402779
piRNAdb-piRNA_Match_Genome-rno-piR-3380	13.0872027272073	0.0547084184115513	0.972627209887529	0.0562480854487688	0.955144175120607	0.984528206270697
piRNAdb-piRNA_Match_Genome-rno-piR-20536	14.9719628721953	-0.0551317213143797	0.990563298931423	-0.0556569392121164	0.955615103827506	0.984528206270697
piRNAdb-piRNA_Match_Genome-rno-piR-4668	30.6779587046181	0.0346711691446044	0.640121785299787	0.0541633950614053	0.956804984362842	0.984989937390584
piRNAdb-piRNA_Match_Genome-rno-piR-38008	14.3703364868525	-0.0442181276232497	0.840057636070782	-0.0526370164671939	0.958021122963038	0.985477963822551
miRBase-miRNA_Unmatch_Genome-rno-mir-15a	256.937712515249	-0.0212857228003328	0.4196081553703	-0.050727619394214	0.959542567882893	0.98627904810254
miRBase-miRNA_Match_Genome-rno-mir-135a	898.828685375108	0.0215490754617399	0.434309861161407	0.0496168228925648	0.960427740413828	0.986425397733614
piRNAdb-piRNA_Match_Genome-rno-piR-25195	49.9509181550091	0.0246305141086384	0.527216980820487	0.0467179833060514	0.962737997388985	0.987093270731199
piRNAdb-piRNA_Match_Genome-rno-piR-57574	13.1642915896827	-0.043742309048775	0.936600980359065	-0.0467032492663049	0.962749740633641	0.987093270731199
piRNAdb-piRNA_Match_Genome-rno-piR-2608	15.7471264165479	-0.0354241980519441	0.785974547107116	-0.045070413771448	0.964051183839131	0.987093270731199
GtRNAdb-mature-tRNA_Unmatch_Genome-mature-tRNA-Ser-AGA	1503.98434835637	-0.0129224847720687	0.286391303311377	-0.0451217778705339	0.96401024286863	0.987093270731199
GtRNAdb-mature-tRNA_5_end_Match_Genome-mature-tRNA-Gln-CTG_5_end	931.11343236824	-0.0140403046162301	0.318597303079674	-0.0440691257600473	0.964849302939649	0.987149363870458
piRNAdb-piRNA_Match_Genome-rno-piR-34640	45.4860495366487	-0.0251830707887224	0.585701121407971	-0.0429964530854656	0.965704361268433	0.987263581035011
piRNAdb-piRNA_Match_Genome-rno-piR-32313	13.0445998468306	0.0468023692496212	1.21242090439216	0.0386024103346232	0.969207380557631	0.990082616446565
piRNAdb-piRNA_Match_Genome-rno-piR-59301	12.2701755833624	-0.0293534798568404	0.986700491364391	-0.0297491286502259	0.976267130244706	0.994478164563474
piRNAdb-piRNA_Match_Genome-rno-piR-35951	21.1355979639402	-0.0224760638308694	0.777690950189445	-0.0289010227332519	0.976943529940623	0.994478164563474
piRNAdb-piRNA_Match_Genome-rno-piR-52967	25.4341721453506	0.0202362867990737	0.72369578459471	0.0279624218212167	0.977692122461284	0.994478164563474
piRNAdb-piRNA_Match_Genome-rno-piR-17135	12.5073151991932	-0.032848206201348	1.18950854423134	-0.0276149392626468	0.977969266401094	0.994478164563474
piRNAdb-piRNA_Match_Genome-rno-piR-6142	14.5351649707859	0.0237807444676477	0.895526358939469	0.0265550469065033	0.978814627974451	0.994478164563474
piRNAdb-piRNA_Match_Genome-rno-piR-23346	16.0637973450522	-0.0211634322048761	0.83046241905323	-0.0254839132022416	0.979668979726086	0.994478164563474
piRNAdb-piRNA_Match_Genome-rno-piR-11412	33.0085980896898	0.0150630863491521	0.610886531768012	0.0246577483146615	0.980327956784403	0.994478164563474
miRBase-miRNA_Match_Genome-rno-mir-211	48.2845086384363	0.0169274420382746	0.586272609769769	0.028872988019894	0.976965889074739	0.994478164563474
miRBase-miRNA_Match_Genome-rno-mir-96	188.398717017924	-0.0144279989488156	0.527821320059867	-0.0273350059963079	0.9781925365453	0.994478164563474
miRBase-miRNA_Match_Genome-rno-mir-742	167.496943082429	-0.0104849500695991	0.440234583328816	-0.0238167342290958	0.980998791851017	0.994478164563474
piRNAdb-piRNA_Match_Genome-rno-piR-22453	24.1057344869244	-0.0137803330731638	0.6750115082146	-0.0204149601976605	0.983712349825695	0.996468345208637
piRNAdb-piRNA_Match_Genome-rno-piR-7904	17.6752025110438	-0.0193352356726517	1.12367122637676	-0.0172072001300572	0.986271318167313	0.996862812997507
piRNAdb-piRNA_Match_Genome-rno-piR-30500	41.6743320111334	0.00906662654654261	0.530090771256291	0.0171039132129298	0.986353717077353	0.996862812997507
GtRNAdb-mature-tRNA_5_end_Match_Genome-mature-tRNA-Gly-GCC_5_end	786065.806714258	-0.00545980722533013	0.290225907852891	-0.0188122668500621	0.98499086802395	0.996862812997507
piRNAdb-piRNA_Match_Genome-rno-piR-36203	63.0631464804543	0.00915277645123164	0.637256854410144	0.0143627744258688	0.988540558030016	0.997143066854393
piRNAdb-piRNA_Match_Genome-rno-piR-32523	22.0768329085235	0.00879686900313424	0.702464556751214	0.0125228652728308	0.990008460291607	0.997143066854393
piRNAdb-piRNA_Match_Genome-rno-piR-21887	14.7987461357131	0.0102042282898824	0.838328240889031	0.0121721156370218	0.990288296676479	0.997143066854393
piRNAdb-piRNA_Match_Genome-rno-piR-9871	22.6642416239391	-0.00844353955467249	0.717613062558501	-0.0117661452880593	0.990612190946444	0.997143066854393
piRNAdb-piRNA_Match_Genome-rno-piR-54457	13.3637158348726	-0.0107796221504082	0.920216252853479	-0.0117142270819298	0.990653612826807	0.997143066854393
piRNAdb-piRNA_Match_Genome-rno-piR-27629	12.2548224311163	0.0104932708325712	0.944541679953502	0.0111093782892543	0.991136180909487	0.997143066854393
piRNAdb-piRNA_Match_Genome-rno-piR-58942	13.083022079523	0.00878062144838896	1.08209508500098	0.00811446384897037	0.993525665625702	0.998790373921977
piRNAdb-piRNA_Match_Genome-rno-piR-17448	18.406922674631	0.0046352359856312	0.770917875565764	0.00601261967395616	0.995202652497483	0.998907875932642
piRNAdb-piRNA_Match_Genome-rno-piR-40916	16.6975485015978	0.0036428095937586	0.900411384415924	0.00404571694317437	0.996771993719572	0.998907875932642
piRNAdb-piRNA_Match_Genome-rno-piR-55856	16.294766405734	-0.00384593259785454	1.0873154309737	-0.00353709005528459	0.997177816339446	0.998907875932642
piRNAdb-piRNA_Match_Genome-rno-piR-17679	35.769178309255	-0.00192777039132465	0.592387253573698	-0.0032542401607985	0.997403496601418	0.998907875932642
GtRNAdb-mature-tRNA_CCA_end_Unmatch_Genome-mature-tRNA-Trp-CCA_CCA_end	6807.93140390954	-0.00162703710027189	0.294110814155882	-0.00553205466089914	0.995586081510216	0.998907875932642
piRNAdb-piRNA_Match_Genome-rno-piR-16115	15.9895275038993	0.00116688163695281	0.888450294473403	0.00131338989272826	0.998952066783557	0.999214127666922
piRNAdb-piRNA_Match_Genome-rno-piR-16545	32.6537783538072	0.000731072769022637	0.742247253607695	0.000984945064423284	0.999214127666922	0.999214127666922
GtRNAdb-mature-tRNA_CCA_end_Match_Genome-mature-tRNA-Ala-AGC_CCA_end	441.155127845802	-2.83918837393162	0.417642031654777	-6.79813849837435	1.05979550193436e-11	1.00529173326345e-09
GtRNAdb-mature-tRNA_CCA_end_Unmatch_Genome-mature-tRNA-Ser-CGA_CCA_end	333.659335449384	-2.08874476566553	0.327389108297792	-6.38000688699032	1.77080020124142e-10	1.03974424096647e-08
miRBase-miRNA_Match_Genome-rno-mir-222	1296.83834474029	-2.00678883790789	0.314670119734976	-6.37743691583447	1.80076186311963e-10	1.03974424096647e-08
miRBase-miRNA_Match_Genome-rno-mir-122	77.2853073093104	-4.71065551114091	0.695079022568632	-6.77715102627167	1.22568745824626e-11	1.08514196303403e-09
miRBase-miRNA_Match_Genome-rno-mir-221	2562.47939992917	-1.82500907546834	0.306772371705013	-5.94906596485565	2.69676948121547e-09	1.19376995701805e-07
miRBase-miRNA_Match_Genome-rno-mir-100	2199.66162709812	-2.04868692757022	0.344716681475276	-5.94310353303037	2.7967566510079e-09	1.19809446210919e-07
GtRNAdb-mature-tRNA_Match_Genome-mature-tRNA-Lys-TTT	158474.397666027	1.3801518461563	0.27573631839099	5.0053321020964	5.57658018101307e-07	1.2552031322687e-05
piRNAdb-piRNA_Match_Genome-rno-piR-61534	382.940141863633	2.82731981831261	0.479679476070885	5.8941855121081	3.76533967849418e-09	1.56261596657508e-07
miRBase-miRNA_Match_Genome-rno-mir-27a	1133.06458433485	-1.44991363867984	0.29252571242064	-4.95653399724028	7.17618153594886e-07	1.58832817995668e-05
GtRNAdb-mature-tRNA_CCA_end_Match_Genome-mature-tRNA-iMet-CAT_CCA_end	1396.91993444764	-2.61809706667435	0.415268357114354	-6.30459080693547	2.88956272782663e-10	1.59889137606407e-08
GtRNAdb-mature-tRNA_CCA_end_Match_Genome-mature-tRNA-Leu-CAA_CCA_end	2638.35616339904	-3.40952663829009	0.397560673163226	-8.57611647339737	9.81301778754407e-18	1.62896095273232e-15
GtRNAdb-mature-tRNA_CCA_end_Match_Genome-mature-tRNA-Leu-CAG_CCA_end	4772.99130030192	-3.00786728073268	0.390136141232346	-7.70978887326756	1.26026050306814e-14	1.67362594807449e-12
miRBase-miRNA_Match_Genome-rno-mir-30c-1	14286.4283445529	-1.75174264552764	0.322009592352384	-5.44003249322668	5.32708543603089e-08	1.72545596562171e-06
miRBase-miRNA_Match_Genome-rno-mir-30c-2	14512.2153831556	-1.74227812975037	0.321045276570821	-5.42689227002543	5.7343715235836e-08	1.813153662695e-06
GtRNAdb-mature-tRNA_5_end_Match_Genome-mature-tRNA-Thr-TGT_5_end	6344.04892751383	1.51516647639151	0.279930115902081	5.41265976870281	6.20954073885412e-08	1.91773723283681e-06
miRBase-miRNA_Match_Genome-rno-mir-501	61.3113074278067	-2.39148919931339	0.48702093788951	-4.91044432232593	9.08702554057007e-07	1.97829015047165e-05
GtRNAdb-mature-tRNA_3_end_Match_Genome-mature-tRNA-Glu-CTC_3_end	275.920224336983	1.84566042415737	0.341997077715062	5.39671402015633	6.78724395931251e-08	2.04851363135614e-06
miRBase-miRNA_Match_Genome-rno-mir-615	144.824071146045	-1.83501369268537	0.374906212748574	-4.89459398187141	9.85088924318691e-07	2.09582988286649e-05
miRBase-miRNA_Match_Genome-rno-mir-195	1008.79722152703	-1.50754684691658	0.308117138382038	-4.89277180371367	9.94256646239372e-07	2.09582988286649e-05
miRBase-miRNA_Match_Genome-rno-mir-455	434.352110655699	-4.02167844566192	0.443016282959224	-9.07794724563676	1.10641764874473e-19	2.09903233933287e-17
miRBase-miRNA_Match_Genome-rno-mir-320	1121.75463937437	-1.77796568887223	0.364797234980485	-4.87384639570347	1.09446099737061e-06	2.27100656954402e-05
miRBase-miRNA_Match_Genome-rno-mir-194-1	269.112902196866	-3.52333207963312	0.441930970625539	-7.97258466553263	1.55389709921247e-15	2.29286149750463e-13
ensembl-snoRNA_Match_Genome--	54021.9181390472	1.89882816543362	0.326144484084474	5.82204592778523	5.81315684602344e-09	2.33935523985428e-07
GtRNAdb-mature-tRNA_CCA_end_Match_Genome-mature-tRNA-His-GTG_CCA_end	561.565324292477	-3.61890787324069	0.34475983794497	-10.4968951569653	8.92681058791774e-26	2.37096089215095e-23
GtRNAdb-mature-tRNA_Unmatch_Genome-mature-tRNA-Ser-CGA	370.032399416814	-1.99086994130098	0.319891059933271	-6.22358731036832	4.85914202297519e-10	2.58117624260442e-08
miRBase-miRNA_Match_Genome-rno-mir-99a	19416.0017137868	-1.92217644980338	0.289909334914897	-6.63026752956276	3.35079005194118e-11	2.78115574311118e-09
miRBase-miRNA_Match_Genome-rno-mir-339	259.950192567034	-1.72785208230474	0.357769853013603	-4.82950720344524	1.36871363285707e-06	2.79638723759107e-05
GtRNAdb-mature-tRNA_CCA_end_Match_Genome-mature-tRNA-Arg-CCT_CCA_end	548.698205980459	-4.65176196926673	0.40241567995714	-11.559594222974	6.60200175623496e-31	2.92248611076001e-28
GtRNAdb-mature-tRNA_5_end_Match_Genome-mature-tRNA-Leu-TAA_5_end	72031.0591831176	1.28696003968063	0.267414136651165	4.81261034213548	1.48971572349675e-06	2.99748860727831e-05
GtRNAdb-mature-tRNA_CCA_end_Match_Genome-mature-tRNA-Leu-TAA_CCA_end	151.038301872388	-2.16976799560486	0.407837497050425	-5.32017779458026	1.03665892380652e-07	3.05929566847789e-06
GtRNAdb-mature-tRNA_3_end_Match_Genome-mature-tRNA-Ala-TGC_3_end	264.973958444763	2.72195265108964	0.440249504494371	6.18275006173105	6.29944110012771e-10	3.21756068498831e-08
miRBase-miRNA_Match_Genome-rno-mir-199a	4001.1733944953	-1.73948007903903	0.301856483994582	-5.76260630886514	8.2824839850365e-09	3.2350408035672e-07
GtRNAdb-mature-tRNA_CCA_end_Match_Genome-mature-tRNA-Ile-TAT_CCA_end	143.973025269219	-4.06383041690739	0.533910798971416	-7.61144075889905	2.71057138702601e-14	3.27239891088231e-12
miRBase-miRNA_Match_Genome-rno-mir-365	180.756267950456	-2.35517593910617	0.444220644665561	-5.30181558959129	1.14656630553761e-07	3.31008707337813e-06
miRBase-miRNA_Match_Genome-rno-mir-351-1	100.281454623816	-2.22993264881964	0.421565686435206	-5.28964458107616	1.22554273305023e-07	3.39066822810563e-06
miRBase-miRNA_Match_Genome-rno-mir-351-2	100.281454623816	-2.22993264881964	0.421565686435206	-5.28964458107616	1.22554273305023e-07	3.39066822810563e-06
miRBase-miRNA_Match_Genome-rno-mir-196b-1	425.271840094817	-1.77759534237603	0.372263667335979	-4.77509759439321	1.79620123644913e-06	3.50787535588888e-05
miRBase-miRNA_Match_Genome-rno-mir-196b-2	425.271840094817	-1.77759534237603	0.372263667335979	-4.77509759439321	1.79620123644913e-06	3.50787535588888e-05
miRBase-miRNA_Match_Genome-rno-mir-107	246.38500270071	-2.67973856919678	0.407225367066069	-6.58048045607634	4.68930472114278e-11	3.5579712990438e-09
miRBase-miRNA_Match_Genome-rno-mir-379	165.551528429704	-2.8749623086902	0.437169289383749	-6.57631352088537	4.82255145954732e-11	3.5579712990438e-09
GtRNAdb-mature-tRNA_CCA_end_Match_Genome-mature-tRNA-Ser-GCT_CCA_end	817.608031118316	-1.6398286156194	0.345179230051622	-4.75065841990019	2.02755377623715e-06	3.90230639832309e-05
GtRNAdb-mature-tRNA_CCA_end_Match_Genome-mature-tRNA-Lys-CTT_CCA_end	2810.88432983249	-1.30988043990545	0.27633388762219	-4.74020921276346	2.13497654434827e-06	4.05035550127786e-05
miRBase-miRNA_Match_Genome-rno-mir-26a	66982.2736396039	-1.2744559655534	0.269272214331194	-4.73296499870527	2.21263655484781e-06	4.13856527441957e-05
miRBase-miRNA_Match_Genome-rno-mir-92a-1	4564.94173626568	-1.46127984107038	0.278675132149731	-5.24366788596421	1.57415440644424e-07	4.2662796974652e-06
miRBase-miRNA_Match_Genome-rno-mir-361	277.628292039073	-1.55000927657743	0.328442791663489	-4.71926714764232	2.36695810272141e-06	4.36572272279726e-05
miRBase-miRNA_Match_Genome-rno-mir-378a	1109.85434850632	-3.56621398460802	0.285081275770678	-12.5094640992021	6.62697987348763e-36	4.40031463599578e-33
GtRNAdb-mature-tRNA_CCA_end_Match_Genome-mature-tRNA-Asn-GTT_CCA_end	902.274404024556	-3.32580544104053	0.333553494922206	-9.97083074130643	2.04511017964624e-23	4.52651053095035e-21
miRBase-miRNA_Match_Genome-rno-mir-434-1	135.238729643745	-2.30356819861522	0.404644217293234	-5.69282372061155	1.24955379153192e-08	4.60946509765108e-07
miRBase-miRNA_Match_Genome-rno-mir-434-2	135.238729643745	-2.30356819861522	0.404644217293234	-5.69282372061155	1.24955379153192e-08	4.60946509765108e-07
miRBase-miRNA_Match_Genome-rno-mir-192	1065.89414502323	-4.44037952841841	0.311264250382117	-14.2656264667956	3.58359297107899e-46	4.7590114655929e-43
miRBase-miRNA_Match_Genome-rno-mir-214	198.79841711713	-1.99094237284082	0.425035130585122	-4.68418309352452	2.81078674801895e-06	5.11332164571119e-05
GtRNAdb-mature-tRNA_CCA_end_Match_Genome-mature-tRNA-Cys-GCA_CCA_end	1340.3716733575	-1.61986516116958	0.346695016397822	-4.67230587275254	2.9783697208514e-06	5.34496620174414e-05
rRNAdb-rRNA_Match_Genome-5S-rRNA	9862.15596983731	-1.51038757230589	0.323565984480583	-4.66794300003597	3.0423026981276e-06	5.38690397748461e-05
rRNAdb-rRNA_Match_Genome-45S-rRNA	21192.6754614722	1.80479565901545	0.296224917548164	6.09265308925946	1.11054554957553e-09	5.46223885124557e-08
GtRNAdb-mature-tRNA_5_end_Match_Genome-mature-tRNA-Phe-GAA_5_end	541.824340306525	1.51990993190288	0.326199495565293	4.65944905668516	3.17056849150708e-06	5.54015125884394e-05
GtRNAdb-mature-tRNA_CCA_end_Match_Genome-mature-tRNA-Gly-GCC_CCA_end	665.51667203281	-1.3940656054746	0.300549625884678	-4.63838742560773	3.5113810669306e-06	6.05599228166732e-05
miRBase-miRNA_Match_Genome-rno-mir-127	112.279337786599	-3.05415947272982	0.591385597532923	-5.16441300814701	2.41194614821926e-07	6.38425626421365e-06
GtRNAdb-mature-tRNA_Match_Genome-mature-tRNA-Arg-ACG	7014.12351253308	1.68392377309678	0.326256613888307	5.16134754489073	2.45178516170855e-07	6.38425626421365e-06
miRBase-miRNA_Match_Genome-rno-mir-126a	3248.3657294362	-2.05023258399523	0.364239783645216	-5.62879914839901	1.81468558132854e-08	6.51324987028189e-07
GtRNAdb-mature-tRNA_CCA_end_Match_Genome-mature-tRNA-Arg-TCT_CCA_end	86.0811999908524	-4.27394562530989	0.622306058570529	-6.86791582123976	6.51466413786482e-12	6.65497998083422e-10
miRBase-miRNA_Match_Genome-rno-mir-99b	1533.90609098575	-2.11838131495916	0.29428974720149	-7.19828446319871	6.09748349265641e-13	6.74788173187309e-11
GtRNAdb-mature-tRNA_5_end_Match_Genome-mature-tRNA-Lys-TTT_5_end	135329.573413769	1.56173686092672	0.278172505268795	5.61427470848577	1.9738841662619e-08	6.89820571788368e-07
GtRNAdb-mature-tRNA_3_end_Match_Genome-mature-tRNA-Thr-TGT_3_end	669.657223133417	2.368284103219	0.514335617050009	4.60455007335946	4.13358553373474e-06	7.03769434461504e-05
GtRNAdb-mature-tRNA_CCA_end_Match_Genome-mature-tRNA-Val-TAC_CCA_end	27.7096719604747	-4.7352965371966	0.923004084732502	-5.13030940547674	2.89266316408864e-07	7.38741669598023e-06
miRBase-miRNA_Match_Genome-rno-mir-26b	15517.2463100595	-1.62526613257376	0.317271027443046	-5.12264276278902	3.01282824725003e-07	7.54912436292084e-06
miRBase-miRNA_Match_Genome-rno-mir-194-2	754.304448119729	-3.95329438882929	0.357974965876029	-11.0434940028694	2.35686427230302e-28	7.82478938404602e-26
piRNAdb-piRNA_Match_Genome-rno-piR-61384	286.875026040299	2.91382951415711	0.451766772416818	6.44985353519689	1.11958297502481e-10	7.82529574122607e-09
GtRNAdb-mature-tRNA_CCA_end_Match_Genome-mature-tRNA-Thr-AGT_CCA_end	129.783148180425	-2.30166472379726	0.503053146626623	-4.57539076980589	4.75331920184316e-06	7.99038974689585e-05
GtRNAdb-mature-tRNA_CCA_end_Match_Genome-mature-tRNA-Gly-TCC_CCA_end	321.991969123858	-1.73648493184623	0.339966448848961	-5.10781266129502	3.2590953240062e-07	8.01496035237079e-06
miRBase-miRNA_Match_Genome-rno-mir-218a-2	351.66158111589	-1.69592298777381	0.370974152249017	-4.57153949269063	4.84154017028367e-06	8.03695668267089e-05
miRBase-miRNA_Match_Genome-rno-mir-181b-1	281.142913335806	-1.62861265933574	0.356915450920211	-4.563020892306	5.04227948572258e-06	8.26684834202418e-05
GtRNAdb-mature-tRNA_3_end_Match_Genome-mature-tRNA-Ala-CGC_3_end	184.115451712295	2.47373661555787	0.444332804455285	5.56730583642247	2.58708094650854e-08	8.66193476396193e-07
miRBase-miRNA_Match_Genome-rno-mir-155	188.481021034201	-2.06457514709101	0.370937253514925	-5.56583391807516	2.60901649516926e-08	8.66193476396193e-07
miRBase-miRNA_Match_Genome-rno-mir-23b	3959.95027266698	-1.35886037448204	0.267048858383497	-5.08843356495699	3.61033212860839e-07	8.7173110305308e-06
miRBase-miRNA_Match_Genome-rno-mir-23a	10934.6386915139	-1.6160676887417	0.268890090179479	-6.01014223939232	1.85360624396124e-09	8.79138961421619e-08
GtRNAdb-mature-tRNA_CCA_end_Match_Genome-mature-tRNA-Gln-CTG_CCA_end	3327.64803629573	-1.58831098883545	0.312555984624621	-5.08168477638658	3.741018599811e-07	8.87155839383752e-06
miRBase-miRNA_Match_Genome-rno-mir-22	3808.31322721558	-1.86644473309895	0.367680500892819	-5.07626792437119	3.84920428601022e-07	8.96797068740626e-06
miRBase-miRNA_Match_Genome-rno-mir-152	428.999388408847	-2.36675241064858	0.368775173388742	-6.41787349430294	1.38191012073403e-10	9.17588320167394e-09
miRBase-miRNA_Match_Genome-rno-mir-223	605.869104577978	-2.07075212527968	0.32325073998511	-6.40602439262804	1.49363078178458e-10	9.4454365629044e-09
GtRNAdb-mature-tRNA_3_end_Match_Genome-mature-tRNA-Ala-AGC_3_end	146.629569026747	2.89461731048954	0.48341691070758	5.98782799354842	2.12661785817811e-09	9.73844315745011e-08
GtRNAdb-mature-tRNA_5_end_Match_Genome-mature-tRNA-Thr-AGT_5_end	71.1924853878661	-3.10752877929501	0.614904840474885	-5.05367428380479	4.33390467452095e-07	9.92314725476522e-06
GtRNAdb-mature-tRNA_CCA_end_Match_Genome-mature-tRNA-Glu-CTC_CCA_end	11.1184593142709	-7.09131564379716	1.56850344575102	-4.52107112866543	6.15275084064774e-06	NA
GtRNAdb-mature-tRNA_CCA_end_Match_Genome-mature-tRNA-Thr-CGT_CCA_end	8.71280522342049	-4.97951348196836	1.54221017096205	-3.22881639333379	0.00124303673023148	NA
GtRNAdb-mature-tRNA_CCA_end_Match_Genome-mature-tRNA-Arg-ACG_CCA_end	5.06561798203659	-5.96728257755734	1.90029391439066	-3.14018927933618	0.00168838708431052	NA
miRBase-miRNA_Match_Genome-rno-mir-329	6.51041825260616	-5.34307368146719	1.75856770727855	-3.03830990376583	0.00237909153058509	NA
miRBase-miRNA_Match_Genome-rno-mir-299a	9.2588495752144	-3.00255396719408	1.11619556998538	-2.68998914521171	0.00714543432218386	NA
miRBase-miRNA_Match_Genome-rno-mir-193b	9.55991974218715	-3.06806915735689	1.18437368573799	-2.59045704434506	0.00958485828197817	NA
miRBase-miRNA_Match_Genome-rno-mir-341	3.96927019183591	-5.63510309564543	2.27760764411877	-2.47413250047539	0.0133560151957076	NA
miRBase-miRNA_Match_Genome-rno-mir-653	4.53599329533499	4.51680177927905	1.83405707631247	2.46273784911888	0.0137880687028081	NA
miRBase-miRNA_Match_Genome-rno-mir-129-1	4.84364890618786	-4.15009220666412	1.76344164501765	-2.35340489910149	0.0186023656358828	NA
miRBase-miRNA_Match_Genome-rno-mir-325	5.90940605862992	-4.44561406135674	1.94476104681256	-2.28594359633182	0.0222575585157726	NA
miRBase-miRNA_Match_Genome-rno-mir-539	4.34490505871911	-4.73487892617355	2.07937829620026	-2.27706470478498	0.0227823619956617	NA
miRBase-miRNA_Match_Genome-rno-mir-543	10.266581512275	-3.07497143620772	1.3999066892405	-2.19655457027354	0.0280522737798	NA
miRBase-miRNA_Match_Genome-rno-mir-495	4.075697967522	-3.68883222743319	1.84443642608895	-1.99997797444024	0.0455026423112622	NA
GtRNAdb-mature-tRNA_3_end_Match_Genome-mature-tRNA-Cys-GCA_3_end	12.1962791884495	2.21815491829853	1.11535170736831	1.98874929194515	0.0467288823155059	NA
GtRNAdb-pre-tRNA_Match_Genome-pre-tRNA-Ile-TAT	11.8518464192987	2.08028133122842	1.0528561260682	1.97584577771044	0.0481722469038573	NA
miRBase-miRNA_Match_Genome-rno-mir-129-2	10.4509754807569	-2.21045943349794	1.12515008022499	-1.96459074424625	0.0494616240989133	NA
miRBase-miRNA_Match_Genome-rno-mir-410	4.91526274241937	-3.62789656976008	1.90075968839845	-1.90865609782418	0.0563064701009902	NA
miRBase-miRNA_Match_Genome-rno-mir-490	4.18428517575461	-3.96941874855556	2.0921601644951	-1.89728244324616	0.0577906708818338	NA
miRBase-miRNA_Match_Genome-rno-mir-1193	3.1971530504628	-4.23271496785494	2.30348550188031	-1.83752620296495	0.0661322518879253	NA
GtRNAdb-mature-tRNA_3_end_Match_Genome-mature-tRNA-Arg-CCT_3_end	10.690489316565	1.87303866405536	1.02296710947493	1.8309862034731	0.0671026023607749	NA
GtRNAdb-mature-tRNA_CCA_end_Match_Genome-mature-tRNA-Arg-TCG_CCA_end	2.6290659867536	-3.97629663901127	2.18221474234023	-1.8221381066957	0.0684340329535117	NA
miRBase-miRNA_Match_Genome-rno-mir-377	2.60329235929894	-4.99293623711847	2.84845723231466	-1.75285631129564	0.0796266744005784	NA
miRBase-miRNA_Match_Genome-rno-mir-702	5.14960269867349	-2.93010388334071	1.7120972940498	-1.71141201701793	0.0870050803702046	NA
miRBase-miRNA_Match_Genome-rno-mir-412	9.66316911871854	-2.64900799242332	1.54952870792736	-1.70955722141258	0.0873477818991341	NA
miRBase-miRNA_Match_Genome-rno-mir-667	3.07824599514096	-4.25686936701334	2.53946396639945	-1.67628657989934	0.0936820722960358	NA
miRBase-miRNA_Match_Genome-rno-mir-3102	5.84369977259993	-6.17186132219929	3.7999698454845	-1.62418692072868	0.104335921428961	NA
piRNAdb-piRNA_Match_Genome-rno-piR-13784	7.46932183812108	-6.5158238438427	1.82693501823304	-3.56653289734664	0.000361735417899431	NA
piRNAdb-piRNA_Match_Genome-rno-piR-39782	6.82941863778261	6.15263772333589	1.74428768759687	3.52730674365561	0.000419810100881205	NA
piRNAdb-piRNA_Match_Genome-rno-piR-57331	5.96372568279444	-6.21230923476089	1.78092983106684	-3.48823919190545	0.000486212907089515	NA
piRNAdb-piRNA_Match_Genome-rno-piR-15178	5.96372568279444	-6.21230923476089	1.78092983106684	-3.48823919190545	0.000486212907089515	NA
piRNAdb-piRNA_Match_Genome-rno-piR-34452	5.94690662193246	5.96249640762929	1.77211977569013	3.36461253320604	0.000766512190037221	NA
piRNAdb-piRNA_Match_Genome-rno-piR-7654	7.90970958316105	5.35228852827009	1.62303726778483	3.29769909447309	0.000974805385400826	NA
piRNAdb-piRNA_Match_Genome-rno-piR-31389	6.55301285375429	6.08926411824193	1.86277846805518	3.26891480799613	0.00107960801700682	NA
piRNAdb-piRNA_Match_Genome-rno-piR-31680	5.51035841548862	5.84737430605163	1.80622058451513	3.23735337543024	0.00120643918173293	NA
piRNAdb-piRNA_Match_Genome-rno-piR-1126	6.72763052805782	-5.39764915397622	1.68971200966094	-3.19441959524175	0.00140112308726862	NA
piRNAdb-piRNA_Match_Genome-rno-piR-546	5.28592359717607	5.78757700792867	1.82092722436166	3.17836810307317	0.00148106586656139	NA
piRNAdb-piRNA_Match_Genome-rno-piR-8840	11.8456358841312	-3.5164163435579	1.11195469496745	-3.16237375449981	0.00156488572338057	NA
piRNAdb-piRNA_Match_Genome-rno-piR-5017	5.20398580392588	5.76888254874193	1.88696096762423	3.057234700517	0.00223389289991012	NA
piRNAdb-piRNA_Match_Genome-rno-piR-3083	5.20191069630234	5.76123978156509	1.92174927361464	2.99791437970923	0.00271834030967132	NA
piRNAdb-piRNA_Match_Genome-rno-piR-45089	9.39898802657688	3.94639414461999	1.3250828168395	2.97822452639804	0.00289923515746977	NA
GtRNAdb-mature-tRNA_CCA_end_Match_Genome-mature-tRNA-Ala-TGC_CCA_end	11.0377337864491	-1.47303369238069	0.939696339110872	-1.56756351075546	0.116983033432361	NA
piRNAdb-piRNA_Match_Genome-rno-piR-25756	4.81622695702367	5.64945629254252	1.90017326012895	2.9731269306248	0.00294782519018455	NA
piRNAdb-piRNA_Match_Genome-rno-piR-35075	7.68831586632365	4.6510898422518	1.56486485188669	2.97219906028574	0.0029567491367462	NA
piRNAdb-piRNA_Match_Genome-rno-piR-24168	4.65656883914461	5.60662025593357	1.89904864024648	2.95233104466765	0.00315384611087262	NA
piRNAdb-piRNA_Match_Genome-rno-piR-15355	4.5137960351269	5.56661977530079	1.89807120620704	2.9327771039869	0.0033594498109159	NA
piRNAdb-piRNA_Match_Genome-rno-piR-45923	4.67124115590474	5.60496104650968	1.91579725369711	2.92565459925011	0.00343732338361864	NA
piRNAdb-piRNA_Match_Genome-rno-piR-16502	9.17166580511383	-4.52322603029893	1.56267795971346	-2.89453498859633	0.00379720588581575	NA
piRNAdb-piRNA_Match_Genome-rno-piR-13456	4.43102752228145	5.53269942463666	1.91488604267791	2.88931001705948	0.00386088227078539	NA
piRNAdb-piRNA_Match_Genome-rno-piR-14568	4.99249460980872	5.70337249677626	1.98375665700583	2.87503634915817	0.00403980987162105	NA
piRNAdb-piRNA_Match_Genome-rno-piR-54549	4.38445115984104	5.52485708488582	1.92431874139276	2.87107170243901	0.00409082721857348	NA
piRNAdb-piRNA_Match_Genome-rno-piR-11945	10.5147457780533	-3.70942782743847	1.29276406370864	-2.86937727584799	0.00411280901932425	NA
piRNAdb-piRNA_Match_Genome-rno-piR-35568	4.91339200767389	5.68660448851114	1.9898120018641	2.85786018135572	0.00426508278919467	NA
piRNAdb-piRNA_Match_Genome-rno-piR-1808	8.51511901873326	-4.04655758822904	1.42294032417683	-2.84379992574177	0.00445790309596422	NA
piRNAdb-piRNA_Match_Genome-rno-piR-51349	5.8001865421873	4.9422741877874	1.76574160434843	2.79897929324214	0.00512644248052789	NA
piRNAdb-piRNA_Match_Genome-rno-piR-6298	4.84847741776273	5.66621781546568	2.02588399715111	2.79691128585534	0.00515936976897535	NA
piRNAdb-piRNA_Match_Genome-rno-piR-56457	4.2407097467504	5.47475925759453	1.95897791105465	2.79470188341588	0.00519475944617261	NA
piRNAdb-piRNA_Match_Genome-rno-piR-25344	8.03532944309406	-4.0176806812058	1.44709619282547	-2.77637430125584	0.00549688855507215	NA
piRNAdb-piRNA_Match_Genome-rno-piR-4458	4.27468890005422	5.49522516956797	1.9797231448034	2.77575436948972	0.0055073799099704	NA
piRNAdb-piRNA_Match_Genome-rno-piR-30340	4.0603625148217	5.40884557973396	1.97656582672112	2.73648643855519	0.00620991545037206	NA
piRNAdb-piRNA_Match_Genome-rno-piR-57100	4.14091803056593	5.43937024829531	1.99130746671517	2.73155720008825	0.0063035797710404	NA
piRNAdb-piRNA_Match_Genome-rno-piR-39441	4.28431302859778	5.48290529534585	2.0119878220382	2.72511852968947	0.00642784066806517	NA
piRNAdb-piRNA_Match_Genome-rno-piR-17098	3.82771258676847	-5.55108069641917	2.05144030322456	-2.70594308188919	0.00681107188257698	NA
piRNAdb-piRNA_Match_Genome-rno-piR-17900	4.15655895639899	5.44511159184687	2.03329981991836	2.67796787198137	0.00740703227985338	NA
piRNAdb-piRNA_Match_Genome-rno-piR-373	3.9807756081504	5.38583668438475	2.01874480544507	2.66791358167599	0.00763238868734886	NA
piRNAdb-piRNA_Match_Genome-rno-piR-39436	3.91427021515217	5.3530896255337	2.03276793000033	2.63339929095243	0.00845349014353409	NA
piRNAdb-piRNA_Match_Genome-rno-piR-29272	4.71342780795684	-4.8354082135994	1.84121319313603	-2.62620767199888	0.00863421212077315	NA
piRNAdb-piRNA_Match_Genome-rno-piR-27235	9.99194674801142	-3.64116274712013	1.38835383989773	-2.6226475142593	0.00872494881049265	NA
piRNAdb-piRNA_Match_Genome-rno-piR-54432	4.23711447214322	5.47453313246915	2.09009629114823	2.61927316729586	0.00881173538778906	NA
piRNAdb-piRNA_Match_Genome-rno-piR-7503	6.28489632809714	4.3648263021308	1.67007645487779	2.61354879256124	0.00896072879029703	NA
piRNAdb-piRNA_Match_Genome-rno-piR-15027	5.22632095361165	4.7247261401148	1.80843760719465	2.61260113222488	0.00898561029212657	NA
piRNAdb-piRNA_Match_Genome-rno-piR-54119	4.93137823402436	4.70350015671598	1.80482905804639	2.60606406781107	0.00915893281594523	NA
piRNAdb-piRNA_Match_Genome-rno-piR-34094	5.10224470219678	-4.96052414128562	1.90658774790982	-2.60178119088609	0.00927410022226289	NA
piRNAdb-piRNA_Match_Genome-rno-piR-58841	8.21867788218666	-4.14172255856265	1.59942306214117	-2.58951034069627	0.00961125361471103	NA
piRNAdb-piRNA_Match_Genome-rno-piR-42766	5.55996535119265	-5.10758656596798	1.97390398119214	-2.58755573454149	0.00966595570422107	NA
piRNAdb-piRNA_Match_Genome-rno-piR-7471	5.16728527151232	4.72486323394014	1.83463644430189	2.57536758773918	0.0100133605267154	NA
piRNAdb-piRNA_Match_Genome-rno-piR-26355	3.64056173276153	5.24671390100947	2.0548685101035	2.55330882497451	0.0106704838300251	NA
piRNAdb-piRNA_Match_Genome-rno-piR-16580	7.00826853237424	-3.56188140099935	1.3980210645231	-2.54780238394648	0.0108403859385375	NA
piRNAdb-piRNA_Match_Genome-rno-piR-42070	3.56111271556791	5.21538305655329	2.05562257952739	2.53713065253076	0.0111765233967684	NA
piRNAdb-piRNA_Match_Genome-rno-piR-7222	3.70436982412208	5.27134059001896	2.08605347390173	2.5269441344471	0.0115059803590622	NA
piRNAdb-piRNA_Match_Genome-rno-piR-10881	3.9474672514529	-5.60443217392355	2.22902575238773	-2.51429673610549	0.0119270033515816	NA
piRNAdb-piRNA_Match_Genome-rno-piR-24382	3.51391415911335	5.20651764752311	2.07577586431014	2.50822727879315	0.0121338593378179	NA
piRNAdb-piRNA_Match_Genome-rno-piR-53776	4.02235656279285	-5.62032900005029	2.24606292718529	-2.50230255440507	0.0123388428733595	NA
piRNAdb-piRNA_Match_Genome-rno-piR-26070	7.20292219248798	-3.73782521780541	1.49850668816511	-2.49436672343606	0.0126182102749724	NA
piRNAdb-piRNA_Match_Genome-rno-piR-22957	7.16295233059247	3.51006111524484	1.40958359904167	2.49014043411914	0.0127692628918583	NA
piRNAdb-piRNA_Match_Genome-rno-piR-26761	3.4855782514182	-5.41266538261113	2.1872289090941	-2.47466799661721	0.0133360083580381	NA
piRNAdb-piRNA_Match_Genome-rno-piR-51580	5.44251345451587	-5.04340712787015	2.05031995215149	-2.45981468530211	0.0139008772178276	NA
piRNAdb-piRNA_Match_Genome-rno-piR-13052	3.47882850725893	5.17732442003758	2.10633777673112	2.45797444134169	0.0139723117610952	NA
piRNAdb-piRNA_Match_Genome-rno-piR-10985	3.3035294635468	5.1103667197567	2.08890516231241	2.44643309421455	0.0144277572701766	NA
piRNAdb-piRNA_Match_Genome-rno-piR-12324	4.05814951772048	5.40494190316065	2.23466906349631	2.41867665841501	0.0155770797337692	NA
piRNAdb-piRNA_Match_Genome-rno-piR-38842	3.30622676518448	5.12329035377337	2.12178280006077	2.41461583797674	0.0157518133705972	NA
piRNAdb-piRNA_Match_Genome-rno-piR-8965	4.2562071970443	4.4904077737775	1.86305285828337	2.41024174585953	0.0159419533268464	NA
piRNAdb-piRNA_Match_Genome-rno-piR-6024	6.23372777307316	3.91820775265643	1.62594015869623	2.4098105528055	0.0159608059407963	NA
piRNAdb-piRNA_Match_Genome-rno-piR-33293	6.23372777307316	3.91820775265643	1.62594015869623	2.4098105528055	0.0159608059407963	NA
piRNAdb-piRNA_Match_Genome-rno-piR-18351	3.92797392283937	5.34758057009284	2.220619839814	2.40814770462501	0.0160336926394295	NA
piRNAdb-piRNA_Match_Genome-rno-piR-14985	4.68818854896788	4.57320137816229	1.89949550863857	2.40758736062506	0.0160583197172886	NA
piRNAdb-piRNA_Match_Genome-rno-piR-4266	8.0784083528075	-3.50975225708461	1.46318880035826	-2.39870087593977	0.0164533491832328	NA
piRNAdb-piRNA_Match_Genome-rno-piR-31992	3.25425579946871	5.08673109890208	2.12133025179881	2.39789683600124	0.01648950865824	NA
piRNAdb-piRNA_Match_Genome-rno-piR-51122	3.36609483224386	-5.36512491043253	2.23834414247856	-2.39691690326566	0.0165336727881972	NA
piRNAdb-piRNA_Match_Genome-rno-piR-39423	3.2239425568755	5.08234485029674	2.1247769861476	2.39194272313324	0.0167594575807837	NA
piRNAdb-piRNA_Match_Genome-rno-piR-13676	3.44644015704219	5.16074761692328	2.16160758478218	2.38745813683075	0.0169653348173721	NA
piRNAdb-piRNA_Match_Genome-rno-piR-44286	3.78053478132698	-5.53184432000514	2.31733072455859	-2.38716220407376	0.0169789981527529	NA
piRNAdb-piRNA_Match_Genome-rno-piR-37651	3.97259505974428	-5.60469672693061	2.35098279929631	-2.38398032031889	0.0171265182145705	NA
piRNAdb-piRNA_Match_Genome-rno-piR-23220	5.98232193066121	3.75926426921489	1.58398178605604	2.37330018710322	0.0176299290678762	NA
piRNAdb-piRNA_Match_Genome-rno-piR-46049	11.2405763977584	2.50836581642718	1.06107927201881	2.36397588999619	0.0180799891702245	NA
piRNAdb-piRNA_Match_Genome-rno-piR-46589	3.14290273659481	5.03781596945002	2.13521194778068	2.35939854808619	0.0183045851455662	NA
piRNAdb-piRNA_Match_Genome-rno-piR-52962	3.15743716387727	5.04116934735386	2.14147968425459	2.35405891749498	0.0185696675266087	NA
piRNAdb-piRNA_Match_Genome-rno-piR-39455	3.43211425534084	5.17212872737211	2.20720638797483	2.34329184418394	0.0191144248563462	NA
miRBase-miRNA_Match_Genome-rno-mir-219b	2.0528060121016	-4.68641819160105	3.0417794546073	-1.54068309735693	0.123393932539967	NA
piRNAdb-piRNA_Match_Genome-rno-piR-7861	3.15805935789141	5.04027103624459	2.15612998367082	2.33764711516303	0.0194055616888881	NA
piRNAdb-piRNA_Match_Genome-rno-piR-3558	4.5167281206919	-4.80359542149348	2.06131134381493	-2.33035899011904	0.0197871853574197	NA
piRNAdb-piRNA_Match_Genome-rno-piR-42388	3.41612758080251	-5.39609484648597	2.32199152543524	-2.32390807088519	0.0201304216074631	NA
piRNAdb-piRNA_Match_Genome-rno-piR-34024	9.79254597158998	-3.1904604413966	1.37369282666449	-2.32254284179635	0.0202037243667952	NA
piRNAdb-piRNA_Match_Genome-rno-piR-27715	2.81221105090918	-5.11162211463221	2.20856343169953	-2.31445565079321	0.0206427412737073	NA
piRNAdb-piRNA_Match_Genome-rno-piR-60237	5.64662481991149	-4.28383632553552	1.86119400614876	-2.30166028441052	0.0213543375746304	NA
piRNAdb-piRNA_Match_Genome-rno-piR-9256	7.8185885150259	3.03468641805198	1.31849458006033	2.30162980109718	0.0213560580542944	NA
piRNAdb-piRNA_Match_Genome-rno-piR-13638	3.56644869450258	-5.45074296475601	2.36983183023128	-2.30005475292483	0.0214451182623273	NA
piRNAdb-piRNA_Match_Genome-rno-piR-7360	3.56359375138541	-5.44681028524215	2.37386646547882	-2.29448891268764	0.0217624311993593	NA
piRNAdb-piRNA_Match_Genome-rno-piR-7030	8.07771939423191	3.51080588243895	1.5302635466974	2.2942491768924	0.021776190038505	NA
piRNAdb-piRNA_Match_Genome-rno-piR-17203	3.47184602685252	-5.41298798559684	2.36244078398833	-2.29126927637039	0.0219478444094262	NA
piRNAdb-piRNA_Match_Genome-rno-piR-25711	3.30145435592326	5.09858661806281	2.22773871054575	2.28868250748032	0.0220978061023384	NA
piRNAdb-piRNA_Match_Genome-rno-piR-31523	3.64180612078981	5.24753175130766	2.29447426981318	2.28703011419471	0.0221940654292697	NA
piRNAdb-piRNA_Match_Genome-rno-piR-49910	7.67854625975208	-3.04628307944941	1.33292258677545	-2.28541635476285	0.0222884259293186	NA
piRNAdb-piRNA_Match_Genome-rno-piR-16576	3.22221386431075	5.07918389809121	2.22374837385831	2.28406413144603	0.0223677621990517	NA
piRNAdb-piRNA_Match_Genome-rno-piR-27549	6.9993301558243	3.4268815866441	1.50189417822618	2.28170641868487	0.0225066788739672	NA
piRNAdb-piRNA_Match_Genome-rno-piR-62535	3.07674375865536	5.00759273891717	2.20386722513795	2.2721844046679	0.0230753748130376	NA
piRNAdb-piRNA_Match_Genome-rno-piR-20868	3.61011060069065	5.24649954452312	2.3146903963054	2.26660963077279	0.0234140832427775	NA
piRNAdb-piRNA_Match_Genome-rno-piR-40174	10.5353348407451	2.92586378111159	1.29165315940212	2.26520855061889	0.0234998846783942	NA
piRNAdb-piRNA_Match_Genome-rno-piR-10837	12.0410673018658	-2.80298220437938	1.23903651918226	-2.2622272717428	0.0236833651838511	NA
piRNAdb-piRNA_Match_Genome-rno-piR-52035	3.28756102999948	-5.33559411730127	2.36198446588649	-2.25894547333474	0.023886776875752	NA
piRNAdb-piRNA_Match_Genome-rno-piR-5603	3.14020543495713	5.02559872393552	2.22812155163525	2.25553166982617	0.024099976727828	NA
piRNAdb-piRNA_Match_Genome-rno-piR-29843	3.55530016754398	-5.44413487708717	2.41508168093295	-2.25422391303307	0.0241820851493833	NA
piRNAdb-piRNA_Match_Genome-rno-piR-55333	3.10816349979917	5.01718599878526	2.232497895659	2.24734187142617	0.0246181868565594	NA
piRNAdb-piRNA_Match_Genome-rno-piR-14573	3.36323988912669	-5.36258562372935	2.38834418281984	-2.24531525326384	0.024747901513017	NA
piRNAdb-piRNA_Match_Genome-rno-piR-22775	2.99999204309942	4.98426868271444	2.22403316944628	2.24109458041734	0.0250199491881723	NA
piRNAdb-piRNA_Match_Genome-rno-piR-7922	2.99999204309942	4.98426868271444	2.22403316944628	2.24109458041734	0.0250199491881723	NA
piRNAdb-piRNA_Match_Genome-rno-piR-24044	4.3606729320145	-4.73521625964574	2.11330484660228	-2.24066881181809	0.0250475357646292	NA
piRNAdb-piRNA_Match_Genome-rno-piR-20582	3.52685778330874	5.20320494722235	2.32555087043538	2.23740749487378	0.0252597191366792	NA
piRNAdb-piRNA_Match_Genome-rno-piR-21979	4.63599353710058	4.55709762759099	2.04148387227836	2.23224767507232	0.025598598046999	NA
piRNAdb-piRNA_Match_Genome-rno-piR-41607	4.14650575586802	4.36532059395475	1.95706448110943	2.23054510267343	0.025711276675126	NA
piRNAdb-piRNA_Match_Genome-rno-piR-35061	7.33126164247191	2.93046029653499	1.31855847552035	2.2224727616866	0.0262513728275148	NA
piRNAdb-piRNA_Match_Genome-rno-piR-28600	2.9800630125416	4.95310237556806	2.2299800272973	2.22114203487784	0.0263413427504601	NA
piRNAdb-piRNA_Match_Genome-rno-piR-17104	4.72354736455633	3.95214939491244	1.78208621141288	2.21770942932053	0.026574650914948	NA
piRNAdb-piRNA_Match_Genome-rno-piR-48771	5.68417144484691	-4.39057879673638	1.9798581873557	-2.21762287055541	0.0265805571620467	NA
piRNAdb-piRNA_Match_Genome-rno-piR-56324	2.80524827336594	4.88064967236161	2.20155304343287	2.21691214159948	0.0266290959036424	NA
piRNAdb-piRNA_Match_Genome-rno-piR-3897	3.96430147590285	-5.60363971987291	2.52838201821632	-2.21629472109047	0.0266713243320614	NA
piRNAdb-piRNA_Match_Genome-rno-piR-27596	9.08708441380454	2.54057821659726	1.14699869085795	2.21497917726212	0.02676149379314	NA
miRBase-miRNA_Match_Genome-rno-mir-295-1	4.02274725125417	2.53693203646083	1.66062693500561	1.52769534383848	0.126588196714395	NA
miRBase-miRNA_Match_Genome-rno-mir-295-2	4.02274725125417	2.53693203646083	1.66062693500561	1.52769534383848	0.126588196714395	NA
piRNAdb-piRNA_Match_Genome-rno-piR-28707	3.40131670821117	5.16173273179486	2.33450163888312	2.21106408572253	0.0270313995247118	NA
piRNAdb-piRNA_Match_Genome-rno-piR-4689	3.19606036223368	-5.28721566711129	2.39353547514317	-2.20895646712528	0.0271776689964733	NA
piRNAdb-piRNA_Match_Genome-rno-piR-16417	3.19606036223368	-5.28721566711129	2.39353547514317	-2.20895646712528	0.0271776689964733	NA
piRNAdb-piRNA_Match_Genome-rno-piR-15833	3.18776677839225	-5.28368948824602	2.39507098886289	-2.2060680091802	0.02737923822911	NA
piRNAdb-piRNA_Match_Genome-rno-piR-56635	3.0929170539751	-5.25467682066791	2.38348482134487	-2.20461937647372	0.0274808149123294	NA
piRNAdb-piRNA_Match_Genome-rno-piR-23922	4.96548969074436	4.03313686923833	1.83233931068857	2.20108625390061	0.0277299182270588	NA
piRNAdb-piRNA_Match_Genome-rno-piR-7473	6.71250206399202	3.55912518490065	1.61782494594291	2.19994455755305	0.0278108288633661	NA
piRNAdb-piRNA_Match_Genome-rno-piR-35579	2.85182463580635	4.89280630701838	2.22447573948696	2.19953233032194	0.0278400928838842	NA
piRNAdb-piRNA_Match_Genome-rno-piR-38618	6.78216681614157	-3.09285479659127	1.40855008269917	-2.19577197472773	0.0281082685447546	NA
piRNAdb-piRNA_Match_Genome-rno-piR-38309	2.8197827006484	4.88426605525065	2.22516702369469	2.19501098265458	0.0281628099317901	NA
piRNAdb-piRNA_Match_Genome-rno-piR-22868	5.69156193602808	3.29865607734034	1.50438784334844	2.19268993160583	0.028329726649128	NA
piRNAdb-piRNA_Match_Genome-rno-piR-53416	2.97895651399099	4.94930885376857	2.25891487631497	2.19101166921461	0.0284509480186629	NA
piRNAdb-piRNA_Match_Genome-rno-piR-27517	3.16288602686796	-5.27328965133548	2.41543284413679	-2.18316549935795	0.0290236244641037	NA
piRNAdb-piRNA_Match_Genome-rno-piR-2997	3.034614910318	-5.24259284383407	2.40857303309414	-2.1766385207341	0.0295075486937782	NA
piRNAdb-piRNA_Match_Genome-rno-piR-33057	2.834939321945	4.88696800858608	2.24967514918839	2.17229941413948	0.0298330861992344	NA
piRNAdb-piRNA_Match_Genome-rno-piR-53444	2.65384341013477	-5.02320870455999	2.31307174683547	-2.1716614330845	0.0298812095642651	NA
piRNAdb-piRNA_Match_Genome-rno-piR-22937	2.75818760638906	4.86226805692779	2.24164392050873	2.16906352183907	0.0300778616456441	NA
piRNAdb-piRNA_Match_Genome-rno-piR-28583	2.81881409157547	4.87269922784947	2.2515609142482	2.16414274959844	0.030453395474478	NA
piRNAdb-piRNA_Match_Genome-rno-piR-15689	3.7802667426107	4.23925188984914	1.96150926735708	2.16121940405669	0.0306783952061386	NA
piRNAdb-piRNA_Match_Genome-rno-piR-6826	2.85403763290757	4.90219170863142	2.27284530079459	2.15685234138796	0.0310171713378863	NA
piRNAdb-piRNA_Match_Genome-rno-piR-9827	3.7556540298027	-5.52547440549398	2.56437374874562	-2.1547071319837	0.0311847593504045	NA
piRNAdb-piRNA_Match_Genome-rno-piR-56929	3.7556540298027	-5.52547440549398	2.56437374874562	-2.1547071319837	0.0311847593504045	NA
piRNAdb-piRNA_Match_Genome-rno-piR-5337	3.7556540298027	-5.52547440549398	2.56437374874562	-2.1547071319837	0.0311847593504045	NA
piRNAdb-piRNA_Match_Genome-rno-piR-43121	3.7556540298027	-5.52547440549398	2.56437374874562	-2.1547071319837	0.0311847593504045	NA
piRNAdb-piRNA_Match_Genome-rno-piR-62408	3.0594714730993	-5.22924529063209	2.43018038462605	-2.15179306182934	0.0314136565529345	NA
piRNAdb-piRNA_Match_Genome-rno-piR-25243	5.44423059262616	3.69379990275385	1.7170511714669	2.15124625528672	0.0314567678614848	NA
piRNAdb-piRNA_Match_Genome-rno-piR-31299	2.75438380620077	4.84179755917038	2.25081392422505	2.15113186703668	0.0314657928734063	NA
piRNAdb-piRNA_Match_Genome-rno-piR-24627	3.24375646995234	-5.31296880731963	2.47045673518722	-2.15060184282765	0.0315076397541053	NA
piRNAdb-piRNA_Match_Genome-rno-piR-41758	3.53176249598614	4.21805949450825	1.96198949231386	2.14988893214393	0.0315640013078679	NA
piRNAdb-piRNA_Match_Genome-rno-piR-6391	2.69106001937668	4.81536580783314	2.2400202518753	2.14969744304848	0.0315791548474791	NA
piRNAdb-piRNA_Match_Genome-rno-piR-36660	8.7971128115667	2.48380808149178	1.15587395759019	2.14885720469914	0.0316457211077852	NA
piRNAdb-piRNA_Match_Genome-rno-piR-42841	2.67541909354362	4.80648992889669	2.23939488828539	2.14633424146861	0.0318463215911869	NA
piRNAdb-piRNA_Match_Genome-rno-piR-16279	2.70891394231097	4.83405345250968	2.25353024817873	2.14510253697126	0.0319446496504413	NA
piRNAdb-piRNA_Match_Genome-rno-piR-20754	5.82895330743495	-3.61210841087361	1.68390386554111	-2.14507994475853	0.0319464556346463	NA
piRNAdb-piRNA_Match_Genome-rno-piR-3227	11.5883989660228	2.21119049380989	1.0312456615073	2.14419374194305	0.0320173663110373	NA
piRNAdb-piRNA_Match_Genome-rno-piR-12182	2.65915597369641	4.79889333543724	2.24283252949668	2.13965745204978	0.0323824599423752	NA
piRNAdb-piRNA_Match_Genome-rno-piR-42046	2.56467938320897	-4.9702684413114	2.32422908753117	-2.13845892729572	0.0324795142408355	NA
piRNAdb-piRNA_Match_Genome-rno-piR-35644	2.73984937891831	4.83806829476234	2.26296550162212	2.13793285460797	0.0325221932515629	NA
piRNAdb-piRNA_Match_Genome-rno-piR-26265	2.69168221339083	4.81414237065079	2.25283981868272	2.13692173350599	0.0326043579768239	NA
piRNAdb-piRNA_Match_Genome-rno-piR-18157	6.03545467958998	-3.92201226248062	1.83555807811253	-2.1366865528513	0.0326234944603362	NA
piRNAdb-piRNA_Match_Genome-rno-piR-24216	10.5380696474073	-2.42764901754613	1.13662586356371	-2.13583826953808	0.0326925986171343	NA
piRNAdb-piRNA_Match_Genome-rno-piR-4427	6.48953452522808	-3.83941041401678	1.79860716578574	-2.13465757673633	0.0327889906616812	NA
piRNAdb-piRNA_Match_Genome-rno-piR-59731	2.80697696593069	4.88376108042081	2.29004597317497	2.13260394665783	0.0329572292994033	NA
piRNAdb-piRNA_Match_Genome-rno-piR-26917	3.68799750900684	-5.49667798781689	2.57866985536708	-2.13159430873885	0.0330402120284439	NA
piRNAdb-piRNA_Match_Genome-rno-piR-17788	2.57014221267622	-5.00459826519072	2.34870870800665	-2.13078712065496	0.0331066838763962	NA
piRNAdb-piRNA_Match_Genome-rno-piR-57330	7.44614108875509	-2.57684979699831	1.20973984773364	-2.1300859038626	0.0331645218738025	NA
piRNAdb-piRNA_Match_Genome-rno-piR-11188	5.75663091254044	-3.25087540907579	1.52675336992067	-2.12927344594281	0.0332316434206289	NA
piRNAdb-piRNA_Match_Genome-rno-piR-9545	2.67763209064483	4.81655319337365	2.26230601260166	2.12904583488889	0.0332504684349831	NA
piRNAdb-piRNA_Match_Genome-rno-piR-11119	2.73812068635356	4.8345333720529	2.27235818595337	2.12754019235949	0.0333752255067757	NA
piRNAdb-piRNA_Match_Genome-rno-piR-3728	3.3231455877481	-4.33402770207834	2.03990746089965	-2.12461976101942	0.033618353607583	NA
piRNAdb-piRNA_Match_Genome-rno-piR-48601	2.53669663180042	-4.9712347326229	2.34159188444509	-2.12301501625719	0.0337525935575717	NA
piRNAdb-piRNA_Match_Genome-rno-piR-39553	3.80966828253998	-4.56401021454447	2.15350920816106	-2.11933628946115	0.0340620568670579	NA
piRNAdb-piRNA_Match_Genome-rno-piR-30384	3.49812975774112	4.20217320526872	1.98443007739558	2.11757181728658	0.0342113470853239	NA
piRNAdb-piRNA_Match_Genome-rno-piR-47508	3.23737048560736	5.08252236107715	2.40120345807935	2.11665627249367	0.0342890305262853	NA
piRNAdb-piRNA_Match_Genome-rno-piR-319	6.58284886941595	3.32008894836311	1.56912180120456	2.11588988554897	0.0343541738649306	NA
piRNAdb-piRNA_Match_Genome-rno-piR-49148	3.46622571206084	4.18916049458311	1.98243140639441	2.11314272013186	0.0345885541727221	NA
piRNAdb-piRNA_Match_Genome-rno-piR-55768	9.24447639757235	-2.48768241934427	1.17740629951764	-2.1128495918218	0.0346136435041641	NA
piRNAdb-piRNA_Match_Genome-rno-piR-58410	3.23896128869443	5.08930881591657	2.40990810015464	2.11182692634213	0.0347012968734594	NA
piRNAdb-piRNA_Match_Genome-rno-piR-49965	2.96253216460924	-5.17821696270521	2.45314439418872	-2.11084882527582	0.0347853078931266	NA
piRNAdb-piRNA_Match_Genome-rno-piR-22713	2.96253216460924	-5.17821696270521	2.45314439418872	-2.11084882527582	0.0347853078931266	NA
piRNAdb-piRNA_Match_Genome-rno-piR-15594	3.14241843205834	5.03496428677954	2.3934758898736	2.10362022365951	0.0354115883905233	NA
piRNAdb-piRNA_Match_Genome-rno-piR-21729	3.2708653343747	5.10290132549352	2.42703071631009	2.1025285305213	0.0355070031241814	NA
piRNAdb-piRNA_Match_Genome-rno-piR-33111	7.98775065214376	3.18107492105636	1.51436475101615	2.10060021465887	0.0356760751921048	NA
piRNAdb-piRNA_Match_Genome-rno-piR-62437	2.81770759302486	4.86929129791591	2.32089337065784	2.09802456221233	0.0359029756693966	NA
piRNAdb-piRNA_Match_Genome-rno-piR-21966	10.3662222486349	-3.07206316838475	1.46430894413141	-2.09796107624475	0.0359085839299608	NA
piRNAdb-piRNA_Match_Genome-rno-piR-2335	8.73095957160313	-3.22341070275837	1.53967343529887	-2.09356778447806	0.0362984998630366	NA
piRNAdb-piRNA_Match_Genome-rno-piR-2206	3.54700658370255	-5.44284794635748	2.60391493033803	-2.09025566962393	0.0365948391526922	NA
piRNAdb-piRNA_Match_Genome-rno-piR-37305	3.54700658370255	-5.44284794635748	2.60391493033803	-2.09025566962393	0.0365948391526922	NA
piRNAdb-piRNA_Match_Genome-rno-piR-42131	3.54700658370255	-5.44284794635748	2.60391493033803	-2.09025566962393	0.0365948391526922	NA
piRNAdb-piRNA_Match_Genome-rno-piR-42064	3.54700658370255	-5.44284794635748	2.60391493033803	-2.09025566962393	0.0365948391526922	NA
piRNAdb-piRNA_Match_Genome-rno-piR-56326	3.54700658370255	-5.44284794635748	2.60391493033803	-2.09025566962393	0.0365948391526922	NA
piRNAdb-piRNA_Match_Genome-rno-piR-33792	3.18814135204545	-4.27239810745713	2.0462471453349	-2.08791890911002	0.0368051501584451	NA
piRNAdb-piRNA_Match_Genome-rno-piR-16365	2.56344383665558	4.748393686377	2.27493314035552	2.08726735838705	0.0368639736569744	NA
piRNAdb-piRNA_Match_Genome-rno-piR-32812	3.71569856775833	4.21989015531176	2.02359398452428	2.08534428723546	0.0370380600897611	NA
piRNAdb-piRNA_Match_Genome-rno-piR-5191	4.26537848686308	-3.95196481967094	1.89588994242175	-2.0844906295683	0.0371155616912177	NA
piRNAdb-piRNA_Match_Genome-rno-piR-8321	2.80652535341782	-5.12910344701452	2.46472004738622	-2.08100853176157	0.0374331251393339	NA
piRNAdb-piRNA_Match_Genome-rno-piR-4556	6.88914305548147	2.80318259447774	1.34929544696214	2.07751578854649	0.0377539795590877	NA
piRNAdb-piRNA_Match_Genome-rno-piR-8865	5.53059438007879	3.71114893684782	1.78744787960167	2.07622777659667	0.0378728894349165	NA
piRNAdb-piRNA_Match_Genome-rno-piR-20448	2.77335101805211	-5.1134256910633	2.47262892354758	-2.0680117596161	0.0386389173125584	NA
piRNAdb-piRNA_Match_Genome-rno-piR-7487	2.82882240733502	-5.14666629614664	2.49264303071534	-2.06474261766622	0.0389473598585678	NA
piRNAdb-piRNA_Match_Genome-rno-piR-26766	4.66532085233626	-4.10996998920491	1.99096762067078	-2.06430780015409	0.0389885419272171	NA
piRNAdb-piRNA_Match_Genome-rno-piR-11634	4.20397434332173	-3.95742238979666	1.91773681450375	-2.06358993573408	0.039056612634216	NA
piRNAdb-piRNA_Match_Genome-rno-piR-19597	2.56123083955436	4.73787884439205	2.29996675610858	2.05997709828132	0.0394007302552337	NA
piRNAdb-piRNA_Match_Genome-rno-piR-19163	2.56171514409083	4.74449900181579	2.30427409201324	2.05899941255275	0.0394942947626046	NA
piRNAdb-piRNA_Match_Genome-rno-piR-59081	2.73908929542649	4.84622483316671	2.3593227587117	2.05407454968687	0.0399684768707343	NA
piRNAdb-piRNA_Match_Genome-rno-piR-15327	4.7273708150409	-3.46320801399377	1.68604754184127	-2.05403936013081	0.0399718823408494	NA
piRNAdb-piRNA_Match_Genome-rno-piR-8650	3.13909893640652	5.02581273347085	2.44768956071159	2.05328846196073	0.0400446092200099	NA
piRNAdb-piRNA_Match_Genome-rno-piR-13295	9.8760103073162	2.16711523172123	1.05581059637546	2.05256060050999	0.0401152120245454	NA
piRNAdb-piRNA_Match_Genome-rno-piR-17481	7.42840171067766	2.81460312016628	1.37262227234788	2.05052997963663	0.040312741345583	NA
piRNAdb-piRNA_Match_Genome-rno-piR-53238	2.54655852279423	4.74172798962428	2.31498439033358	2.04827644170033	0.040532919990881	NA
piRNAdb-piRNA_Match_Genome-rno-piR-19798	9.74803169748786	-2.68097209933388	1.30960425935005	-2.04716201874941	0.0406421792745565	NA
piRNAdb-piRNA_Match_Genome-rno-piR-49204	3.30729857505258	-5.37192628391231	2.62428250807986	-2.04700761727169	0.0406573366422892	NA
piRNAdb-piRNA_Match_Genome-rno-piR-45898	11.8639277334044	2.20672783577573	1.07863539813333	2.04585148938618	0.0407709843678279	NA
piRNAdb-piRNA_Match_Genome-rno-piR-31502	4.15972939045016	3.769929415029	1.84386160091369	2.04458372209763	0.0408959156601638	NA
piRNAdb-piRNA_Match_Genome-rno-piR-22494	8.65274658924058	2.37120997400069	1.15999111343772	2.04416218928905	0.0409375271318938	NA
miRBase-miRNA_Match_Genome-rno-mir-3572	4.44794503883458	-5.7752234443802	3.89944052701182	-1.48103898607368	0.138596184944859	NA
piRNAdb-piRNA_Match_Genome-rno-piR-11769	2.50012004983149	4.72035120001964	2.31308432191477	2.04071730342806	0.0412789344371081	NA
piRNAdb-piRNA_Match_Genome-rno-piR-39683	3.04276460535155	4.98237477138321	2.44384797972587	2.03874169453948	0.0414758141356018	NA
piRNAdb-piRNA_Match_Genome-rno-piR-27412	3.28885156072517	4.10573000281968	2.0143826077493	2.03820763097586	0.0415291726774406	NA
piRNAdb-piRNA_Match_Genome-rno-piR-23381	3.61861617403672	5.25716858825837	2.58119654288787	2.03671766210279	0.0416783435476751	NA
piRNAdb-piRNA_Match_Genome-rno-piR-35627	5.06235065353578	3.58325290847684	1.76287602724181	2.03261763907651	0.0420911680179837	NA
piRNAdb-piRNA_Match_Genome-rno-piR-57106	10.4208295063083	-2.78781283828636	1.37321461782175	-2.03013629632672	0.042342686979648	NA
piRNAdb-piRNA_Match_Genome-rno-piR-4925	2.68133204800914	-5.05916439647838	2.49215259846398	-2.03003796781809	0.0423526800887778	NA
piRNAdb-piRNA_Match_Genome-rno-piR-7188	2.83138191619912	-5.11461763772948	2.52230067690912	-2.02775889668992	0.0425848612969816	NA
piRNAdb-piRNA_Match_Genome-rno-piR-38166	5.57091183486713	-2.9486352432435	1.45424620429487	-2.02760387789578	0.042600692915436	NA
piRNAdb-piRNA_Match_Genome-rno-piR-42344	2.59265058069817	4.74941614866181	2.34424297406073	2.02599141864327	0.042765664032276	NA
piRNAdb-piRNA_Match_Genome-rno-piR-36318	3.3383591376024	-5.35520921869082	2.64758513338629	-2.02267687303466	0.0431064727996102	NA
piRNAdb-piRNA_Match_Genome-rno-piR-14895	3.3383591376024	-5.35520921869082	2.64758513338629	-2.02267687303466	0.0431064727996102	NA
piRNAdb-piRNA_Match_Genome-rno-piR-18794	3.3383591376024	-5.35520921869082	2.64758513338629	-2.02267687303466	0.0431064727996102	NA
piRNAdb-piRNA_Match_Genome-rno-piR-27882	3.3383591376024	-5.35520921869082	2.64758513338629	-2.02267687303466	0.0431064727996102	NA
piRNAdb-piRNA_Match_Genome-rno-piR-33269	4.2139741718777	3.54755148397224	1.75715799057268	2.01891435090368	0.0434961223726735	NA
piRNAdb-piRNA_Match_Genome-rno-piR-42990	2.87064716781357	4.91960723063417	2.43779997398703	2.01805204821138	0.0435858409532858	NA
piRNAdb-piRNA_Match_Genome-rno-piR-60522	2.46489650849939	4.68644103471622	2.32564629562748	2.01511340891663	0.0438927675831894	NA
piRNAdb-piRNA_Match_Genome-rno-piR-4575	2.91625492118105	4.92529274844954	2.45450688643028	2.00663227945253	0.0447888316225247	NA
piRNAdb-piRNA_Match_Genome-rno-piR-15024	3.88072994366197	-3.60281612024372	1.79722708059702	-2.00465270034041	0.0450001884379735	NA
piRNAdb-piRNA_Match_Genome-rno-piR-36615	5.96201256762149	-3.1326531473073	1.56376416990441	-2.00327722529848	0.0451475406224948	NA
piRNAdb-piRNA_Match_Genome-rno-piR-13887	3.20624586618084	-4.27469148650007	2.13391864105678	-2.00321202704482	0.0451545352812029	NA
piRNAdb-piRNA_Match_Genome-rno-piR-47604	6.25366241266965	2.79908865673826	1.39747761772638	2.00295777279942	0.0451818211469476	NA
piRNAdb-piRNA_Match_Genome-rno-piR-1345	7.83591780369507	2.47739990501088	1.24201857521651	1.99465608199863	0.0460804024285827	NA
piRNAdb-piRNA_Match_Genome-rno-piR-49487	6.07874437182179	-2.81853708862971	1.41400458769337	-1.9933012333627	0.046228471438838	NA
piRNAdb-piRNA_Match_Genome-rno-piR-7457	4.00394147743143	4.32729587503184	2.17108519804433	1.99314880822263	0.0462451547560244	NA
piRNAdb-piRNA_Match_Genome-rno-piR-45221	3.25411544912368	-5.31564456245988	2.66840758867663	-1.9920661989633	0.0463637950111108	NA
piRNAdb-piRNA_Match_Genome-rno-piR-46871	7.38410803212047	-2.96314976765255	1.48847639166099	-1.9907267486762	0.0465109363312354	NA
piRNAdb-piRNA_Match_Genome-rno-piR-13568	6.47551968303045	2.72949590537959	1.3722903514358	1.98900757592864	0.0467003667631856	NA
piRNAdb-piRNA_Match_Genome-rno-piR-31062	3.36364756672468	4.07156937986489	2.04778848523915	1.98827633284079	0.0467811368147451	NA
piRNAdb-piRNA_Match_Genome-rno-piR-25602	2.36918437145856	4.63163101317025	2.33344396445749	1.98489060963891	0.0471566433676245	NA
piRNAdb-piRNA_Match_Genome-rno-piR-31174	2.44863338865218	4.67829151888573	2.35876909061712	1.98336138009243	0.0473270777340431	NA
miRBase-miRNA_Match_Genome-rno-mir-802	3.94568765180934	-2.99971031822946	2.04249213954564	-1.46865207466441	0.141927182664766	NA
piRNAdb-piRNA_Match_Genome-rno-piR-23227	3.51825749638716	4.11591358897773	2.07552503648776	1.98307103822884	0.0473594951063094	NA
piRNAdb-piRNA_Match_Genome-rno-piR-10029	7.20585071714806	-3.44357881587459	1.73651422197521	-1.98304095198118	0.0473628553761709	NA
piRNAdb-piRNA_Match_Genome-rno-piR-8173	2.38703829439284	4.652978889028	2.34692726830551	1.98258333433037	0.0474139904525186	NA
piRNAdb-piRNA_Match_Genome-rno-piR-46158	7.32695481091805	-3.17792713315345	1.60422641902939	-1.98097169792043	0.0475944475834758	NA
piRNAdb-piRNA_Match_Genome-rno-piR-21585	2.58153779640191	-4.99561172247021	2.52248049493442	-1.98043621447312	0.0476545340467766	NA
piRNAdb-piRNA_Match_Genome-rno-piR-33780	2.57843579651765	-5.00583448773313	2.5294031924503	-1.97905755107546	0.0478095270189412	NA
piRNAdb-piRNA_Match_Genome-rno-piR-3535	2.57843579651765	-5.00583448773313	2.5294031924503	-1.97905755107546	0.0478095270189412	NA
piRNAdb-piRNA_Match_Genome-rno-piR-29933	2.38434099275516	4.63450175483101	2.34944355874583	1.97259548439843	0.0485416678960158	NA
piRNAdb-piRNA_Match_Genome-rno-piR-2922	6.31194621255998	3.28053472546495	1.66334368760489	1.97225308870996	0.048580721959544	NA
piRNAdb-piRNA_Match_Genome-rno-piR-45136	5.44017656059107	-3.32552245699617	1.68746538273994	-1.97072040174034	0.0487558656280475	NA
piRNAdb-piRNA_Match_Genome-rno-piR-37139	10.4781136762968	-2.83992091825297	1.4459181779596	-1.964095176022	0.0495190555496817	NA
piRNAdb-piRNA_Match_Genome-rno-piR-29299	5.74407802489086	3.10159352823071	1.58015270623629	1.9628441706867	0.0496642835654349	NA
piRNAdb-piRNA_Match_Genome-rno-piR-24763	11.4880650975314	2.33983080406997	1.19612913486787	1.95616905889382	0.0504452421062833	NA
piRNAdb-piRNA_Match_Genome-rno-piR-46055	2.21685935036735	-4.7833315653655	2.44553136582984	-1.95594774706248	0.0504713098616429	NA
piRNAdb-piRNA_Match_Genome-rno-piR-41113	2.8031731657424	4.8671634803393	2.48916539426922	1.95533952526615	0.0505430088965311	NA
piRNAdb-piRNA_Match_Genome-rno-piR-11163	3.19970134412086	3.9818608522323	2.03668202951499	1.95507241411686	0.0505745237295676	NA
piRNAdb-piRNA_Match_Genome-rno-piR-43139	3.12971169150225	-5.261919621238	2.6960990952412	-1.95167886466994	0.0509763434338669	NA
piRNAdb-piRNA_Match_Genome-rno-piR-2978	3.12971169150225	-5.261919621238	2.6960990952412	-1.95167886466994	0.0509763434338669	NA
piRNAdb-piRNA_Match_Genome-rno-piR-43704	3.12971169150225	-5.261919621238	2.6960990952412	-1.95167886466994	0.0509763434338669	NA
piRNAdb-piRNA_Match_Genome-rno-piR-24440	3.12971169150225	-5.261919621238	2.6960990952412	-1.95167886466994	0.0509763434338669	NA
piRNAdb-piRNA_Match_Genome-rno-piR-19229	3.12971169150225	-5.261919621238	2.6960990952412	-1.95167886466994	0.0509763434338669	NA
piRNAdb-piRNA_Match_Genome-rno-piR-45231	3.07017527932363	-4.21368993280126	2.15944696156483	-1.95128197533864	0.0510235120250625	NA
piRNAdb-piRNA_Match_Genome-rno-piR-50121	3.49239050997101	-4.4076233583781	2.25982047353596	-1.95043075766167	0.0511247988493164	NA
piRNAdb-piRNA_Match_Genome-rno-piR-40530	2.80241308225058	4.87349981592743	2.50067718196935	1.94887202997126	0.0513107090632957	NA
piRNAdb-piRNA_Match_Genome-rno-piR-47796	3.71720459176275	-3.7611754178278	1.92995112582634	-1.94884490466949	0.0513139493147033	NA
piRNAdb-piRNA_Match_Genome-rno-piR-37081	2.44877127812986	4.67064528716076	2.39820943730917	1.94755521119177	0.0514682073822513	NA
piRNAdb-piRNA_Match_Genome-rno-piR-59284	2.80400388533766	4.88162434933104	2.50744284044922	1.94685369117187	0.0515522778673315	NA
piRNAdb-piRNA_Match_Genome-rno-piR-29575	2.85023383271928	4.88734701814643	2.51117290674279	1.94624074074045	0.051625828182301	NA
piRNAdb-piRNA_Match_Genome-rno-piR-18033	2.85023383271928	4.88734701814643	2.51117290674279	1.94624074074045	0.051625828182301	NA
piRNAdb-piRNA_Match_Genome-rno-piR-13748	9.48511313288561	-2.74725978552069	1.41236233547428	-1.94515225768756	0.051756655944099	NA
piRNAdb-piRNA_Match_Genome-rno-piR-33208	3.87279727347738	4.25780200401671	2.19121711096698	1.94312192192482	0.0520014289003091	NA
piRNAdb-piRNA_Match_Genome-rno-piR-44743	2.44766477957925	4.66545645418406	2.40429284404697	1.94046930087395	0.0523226815445843	NA
piRNAdb-piRNA_Match_Genome-rno-piR-624	5.57201858650255	-3.80846990791748	1.96350093759018	-1.93963233477833	0.0524243882976621	NA
piRNAdb-piRNA_Match_Genome-rno-piR-9525	2.47956882525953	4.68399118339998	2.41660353547933	1.93825388179403	0.0525922559358104	NA
piRNAdb-piRNA_Match_Genome-rno-piR-16057	2.54265357480185	-4.96625567204778	2.56228738353905	-1.93821181181806	0.0525973862642976	NA
piRNAdb-piRNA_Match_Genome-rno-piR-42606	8.41572308827489	-5.70900271251214	2.94650010833723	-1.93755387836515	0.0526776740520997	NA
piRNAdb-piRNA_Match_Genome-rno-piR-33443	2.52269316172465	-4.95400472379284	2.5601576184566	-1.93503895544501	0.0529855155086018	NA
piRNAdb-piRNA_Match_Genome-rno-piR-25287	2.27285004040359	4.57636395289519	2.3723085168983	1.92907622271601	0.0537214003188307	NA
piRNAdb-piRNA_Match_Genome-rno-piR-24595	9.72116797138299	-2.28796029882958	1.18691854584114	-1.92764727356093	0.0538990145502715	NA
piRNAdb-piRNA_Match_Genome-rno-piR-38122	2.35624074726317	4.63944618365692	2.41024883927276	1.9248826544635	0.0542440403860734	NA
piRNAdb-piRNA_Match_Genome-rno-piR-34781	5.12297155266069	3.10556481781908	1.61398472363315	1.92415998264737	0.054334533408992	NA
piRNAdb-piRNA_Match_Genome-rno-piR-37361	2.47553954502616	-4.950378549311	2.57308183766273	-1.92391026078195	0.0543658328688284	NA
piRNAdb-piRNA_Match_Genome-rno-piR-36744	7.04368325401292	2.60480507177935	1.35455586471787	1.92299567675778	0.0544805928036809	NA
piRNAdb-piRNA_Match_Genome-rno-piR-45604	5.61583964815561	3.06511418442973	1.59451963283366	1.92228061750651	0.05457045752028	NA
piRNAdb-piRNA_Match_Genome-rno-piR-58908	2.86781197669821	4.91279118095888	2.55604462217635	1.92202872294768	0.0546021436789003	NA
piRNAdb-piRNA_Match_Genome-rno-piR-47201	8.04605167264199	-2.43620754767905	1.267747266998	-1.92168235033781	0.0546457394177037	NA
piRNAdb-piRNA_Match_Genome-rno-piR-28966	3.40818438187129	-4.3606006481019	2.2699267121893	-1.92103146973242	0.0547277401953339	NA
piRNAdb-piRNA_Match_Genome-rno-piR-43798	3.40818438187129	-4.3606006481019	2.2699267121893	-1.92103146973242	0.0547277401953339	NA
piRNAdb-piRNA_Match_Genome-rno-piR-4570	2.38371879874102	4.63648298034022	2.41484708155611	1.91999030321726	0.0548591242499855	NA
piRNAdb-piRNA_Match_Genome-rno-piR-41228	2.38371879874102	4.63648298034022	2.41484708155611	1.91999030321726	0.0548591242499855	NA
piRNAdb-piRNA_Match_Genome-rno-piR-9449	3.0371744191821	-5.21586047717369	2.72123805175841	-1.91672333620475	0.0552730889521529	NA
piRNAdb-piRNA_Match_Genome-rno-piR-23477	2.44209396415036	-4.91850618495785	2.56633870991328	-1.91654599837449	0.0552956341251642	NA
piRNAdb-piRNA_Match_Genome-rno-piR-16969	5.25674429227235	-2.93360098339952	1.53179698313269	-1.91513693766389	0.0554750422435661	NA
piRNAdb-piRNA_Match_Genome-rno-piR-46457	3.24454901399652	3.98744396924304	2.08637829506827	1.91117976000251	0.0559814839811149	NA
piRNAdb-piRNA_Match_Genome-rno-piR-37395	3.08710389321868	3.931488788087	2.05799160305371	1.9103522007832	0.0560878808422551	NA
piRNAdb-piRNA_Match_Genome-rno-piR-59933	5.79196100594063	-3.21310637375872	1.68605765279609	-1.90569187739828	0.056690193759701	NA
piRNAdb-piRNA_Match_Genome-rno-piR-61922	2.2398394961727	4.55079475170539	2.38912078379053	1.90479894636603	0.0568062109115967	NA
piRNAdb-piRNA_Match_Genome-rno-piR-34439	9.68761593960952	2.33097227709341	1.22565543409885	1.90181694809459	0.0571950898036732	NA
piRNAdb-piRNA_Match_Genome-rno-piR-31662	2.22419857033963	4.5401233905158	2.38849843477136	1.90082745059467	0.0573246172681568	NA
piRNAdb-piRNA_Match_Genome-rno-piR-58553	3.98843285501455	3.45789255730678	1.82077128091569	1.89913614826337	0.057546577373649	NA
miRBase-miRNA_Match_Genome-rno-mir-760	5.99779350576887	-2.2271275895598	1.54387097188515	-1.44256069977166	0.149144260930306	NA
piRNAdb-piRNA_Match_Genome-rno-piR-37818	6.32145487651498	2.55629228872739	1.34714547105022	1.89756217399041	0.0577537812526345	NA
piRNAdb-piRNA_Match_Genome-rno-piR-6861	2.39233246110179	-4.89123081047521	2.58160659222527	-1.89464608016015	0.0581393056223492	NA
piRNAdb-piRNA_Match_Genome-rno-piR-24962	2.41979691023316	-4.89653389483285	2.58607690128652	-1.89342161186194	0.058301823610272	NA
piRNAdb-piRNA_Match_Genome-rno-piR-3579	2.20793545049243	4.53099693435293	2.39334166131382	1.89316761897909	0.058335582124208	NA
miRBase-miRNA_Match_Genome-rno-mir-6331	5.13994492800805	-2.64384475998754	1.83489060162716	-1.44087323660768	0.149620498326257	NA
piRNAdb-piRNA_Match_Genome-rno-piR-47300	6.8488532168537	-2.77027838420599	1.46387730339525	-1.89242525844259	0.0584343432981148	NA
piRNAdb-piRNA_Match_Genome-rno-piR-1209	7.82472182505387	-2.63261755842227	1.39148484026297	-1.89194842965357	0.0584978522352948	NA
piRNAdb-piRNA_Match_Genome-rno-piR-17588	5.34615901210479	2.99152999371198	1.58151232123873	1.89156287531725	0.0585492462166985	NA
piRNAdb-piRNA_Match_Genome-rno-piR-43643	8.07571912351542	2.77823170275499	1.46893379687496	1.89132533315352	0.0585809289991468	NA
piRNAdb-piRNA_Match_Genome-rno-piR-32715	2.7695330519235	-4.09055105783188	2.16294726813705	-1.89119315024036	0.0585985653922793	NA
piRNAdb-piRNA_Match_Genome-rno-piR-22354	11.5765619381362	-2.13172707871542	1.12802871189445	-1.88978086837464	0.0587872732918897	NA
piRNAdb-piRNA_Match_Genome-rno-piR-32099	2.62711403853845	4.78845673055998	2.54001012980893	1.88521166682126	0.0594012663059454	NA
piRNAdb-piRNA_Match_Genome-rno-piR-48788	2.85111946125222	-5.15864760039053	2.74047462942097	-1.88239202983626	0.0597828072682606	NA
piRNAdb-piRNA_Match_Genome-rno-piR-32014	3.86873578524135	-4.56233993472023	2.4271425645881	-1.87971650338326	0.0601467251608311	NA
piRNAdb-piRNA_Match_Genome-rno-piR-4201	2.59520999285818	4.77154381999942	2.53857350050914	1.87961617776378	0.0601604068305926	NA
piRNAdb-piRNA_Match_Genome-rno-piR-18888	6.6354014914422	2.75980476737246	1.46918208686708	1.87846339268779	0.0603178004234409	NA
piRNAdb-piRNA_Match_Genome-rno-piR-35981	9.41632226218569	-2.24941994073967	1.19759878269936	-1.87827507278316	0.0603435447764107	NA
piRNAdb-piRNA_Match_Genome-rno-piR-47316	2.9210642454021	-5.16219227576923	2.75035052007302	-1.87692159166395	0.060528841092238	NA
piRNAdb-piRNA_Match_Genome-rno-piR-17746	2.9210642454021	-5.16219227576923	2.75035052007302	-1.87692159166395	0.060528841092238	NA
piRNAdb-piRNA_Match_Genome-rno-piR-7020	6.73894430271253	-3.13891709879622	1.67371038164427	-1.87542428679478	0.0607343765269819	NA
piRNAdb-piRNA_Match_Genome-rno-piR-4168	2.61002019909599	4.76463644012582	2.54236126046043	1.87409889940776	0.0609167950053193	NA
piRNAdb-piRNA_Match_Genome-rno-piR-44597	3.74311021456414	3.63136381669228	1.93769652781369	1.87406219940413	0.0609218526280085	NA
piRNAdb-piRNA_Match_Genome-rno-piR-9347	4.44607740917737	3.36137160670011	1.79789465448131	1.86961544066099	0.0615372395205496	NA
piRNAdb-piRNA_Match_Genome-rno-piR-35203	2.65708086607287	4.78614000723113	2.56170715998471	1.86834002027761	0.0617146916809193	NA
piRNAdb-piRNA_Match_Genome-rno-piR-16027	2.65708086607287	4.78614000723113	2.56170715998471	1.86834002027761	0.0617146916809193	NA
piRNAdb-piRNA_Match_Genome-rno-piR-4395	2.22578937342671	4.55357203801142	2.4373301687919	1.86826228810374	0.0617255204164331	NA
piRNAdb-piRNA_Match_Genome-rno-piR-37419	5.69210705917509	3.06803881767619	1.6451478616973	1.86490156241087	0.0621952034094533	NA
piRNAdb-piRNA_Match_Genome-rno-piR-16958	2.51206293704323	-4.94168185597807	2.65226606299558	-1.86319235650013	0.0624352078863742	NA
piRNAdb-piRNA_Match_Genome-rno-piR-43837	2.51686747421516	4.73217166200522	2.54021159891323	1.86290451709998	0.0624757011894052	NA
piRNAdb-piRNA_Match_Genome-rno-piR-1763	6.10962249778168	2.73949404394354	1.47105871424476	1.86226016502	0.0625664275079327	NA
piRNAdb-piRNA_Match_Genome-rno-piR-11001	3.65985739718223	3.57927248029532	1.92246813890287	1.86181107913599	0.0626297242897063	NA
piRNAdb-piRNA_Match_Genome-rno-piR-57340	7.6291003717851	2.70255920144116	1.45207492712765	1.86117062622043	0.0627200850584213	NA
piRNAdb-piRNA_Match_Genome-rno-piR-34992	2.60926011560417	4.77156236787671	2.56604066487382	1.85950380022966	0.062955761098725	NA
piRNAdb-piRNA_Match_Genome-rno-piR-31869	3.10053182195053	3.92795924122519	2.11502788854475	1.8571666418677	0.0632874493096746	NA
piRNAdb-piRNA_Match_Genome-rno-piR-27730	8.54740852563256	-2.1726644952893	1.17142169213071	-1.85472448554151	0.063635580347849	NA
piRNAdb-piRNA_Match_Genome-rno-piR-58460	2.25561831148345	4.55292040840228	2.45624253698342	1.85361190511498	0.0637947031476235	NA
piRNAdb-piRNA_Match_Genome-rno-piR-325	6.64121544643521	-3.10823876134698	1.67801671971769	-1.85232883845753	0.0639786170143792	NA
piRNAdb-piRNA_Match_Genome-rno-piR-30067	2.19388532774643	4.53378201519037	2.45004560335913	1.85048882721788	0.0642431268974647	NA
piRNAdb-piRNA_Match_Genome-rno-piR-4782	2.31690065874167	-4.83676668332563	2.61720533295022	-1.84806542399691	0.0645928789271426	NA
piRNAdb-piRNA_Match_Genome-rno-piR-14462	2.03904959879292	-4.65127677993701	2.51891622335378	-1.84653889510629	0.0648139972565274	NA
piRNAdb-piRNA_Match_Genome-rno-piR-29073	2.03904959879292	-4.65127677993701	2.51891622335378	-1.84653889510629	0.0648139972565274	NA
piRNAdb-piRNA_Match_Genome-rno-piR-53341	2.03904959879292	-4.65127677993701	2.51891622335378	-1.84653889510629	0.0648139972565274	NA
piRNAdb-piRNA_Match_Genome-rno-piR-6047	2.38275018966809	4.62460408039791	2.50466266878993	1.84639797527393	0.0648344410016181	NA
piRNAdb-piRNA_Match_Genome-rno-piR-62215	7.13988927499934	-3.13577544726069	1.69897114134185	-1.84569082485064	0.0649371101986141	NA
piRNAdb-piRNA_Match_Genome-rno-piR-42045	3.4528145108696	-3.62896331582697	1.96626593013907	-1.84561165415214	0.0649486131156788	NA
piRNAdb-piRNA_Match_Genome-rno-piR-36728	2.66378185731484	-4.03043272255701	2.18550504874367	-1.84416536803422	0.0651590437981273	NA
piRNAdb-piRNA_Match_Genome-rno-piR-22268	2.66378185731484	-4.03043272255701	2.18550504874367	-1.84416536803422	0.0651590437981273	NA
piRNAdb-piRNA_Match_Genome-rno-piR-28433	4.28766367932659	3.30998044695957	1.79570028247715	1.84328113063138	0.0652879746975278	NA
piRNAdb-piRNA_Match_Genome-rno-piR-20310	7.39313297726546	-2.87111715164543	1.5584003255846	-1.84234891671264	0.0654241288126079	NA
piRNAdb-piRNA_Match_Genome-rno-piR-31258	5.70532213685558	2.4932176026322	1.35417601565591	1.84113259562095	0.0656021300268202	NA
piRNAdb-piRNA_Match_Genome-rno-piR-28564	2.3340061287017	-4.84332514079215	2.630666671759	-1.84110179856183	0.065606642167005	NA
piRNAdb-piRNA_Match_Genome-rno-piR-61231	2.65791158566812	4.80126302928317	2.61188875922366	1.83823411786888	0.0660279143866641	NA
piRNAdb-piRNA_Match_Genome-rno-piR-29982	2.73707468280213	-5.09997431601674	2.77451014190754	-1.83815306312429	0.0660398539268349	NA
piRNAdb-piRNA_Match_Genome-rno-piR-49753	3.04470182349741	4.99825960786867	2.72064525713963	1.83715962040697	0.0661863347811659	NA
piRNAdb-piRNA_Match_Genome-rno-piR-12205	3.04470182349741	4.99825960786867	2.72064525713963	1.83715962040697	0.0661863347811659	NA
piRNAdb-piRNA_Match_Genome-rno-piR-46134	4.5253984265181	-3.27241487138808	1.78166380070499	-1.83671850440763	0.0662514620921642	NA
piRNAdb-piRNA_Match_Genome-rno-piR-25282	7.03703867664778	2.37441498228297	1.29360242780429	1.83550597250595	0.0664307549685436	NA
piRNAdb-piRNA_Match_Genome-rno-piR-6550	2.36147057783308	-4.84922153336297	2.64577247404637	-1.83281880091023	0.0668295222516115	NA
piRNAdb-piRNA_Match_Genome-rno-piR-392	4.84511708645437	2.83810088347191	1.54924343985032	1.83192699770032	0.0669622976538769	NA
piRNAdb-piRNA_Match_Genome-rno-piR-5520	3.05236465642305	3.90521263926062	2.13602102358742	1.82826507610953	0.0675097785243147	NA
piRNAdb-piRNA_Match_Genome-rno-piR-56438	4.30060730352198	3.30196266864682	1.806608348913	1.82771361077433	0.0675925443413493	NA
piRNAdb-piRNA_Match_Genome-rno-piR-26160	3.69199238482147	-4.47958290973537	2.45384076495377	-1.82553936413219	0.0679196765697468	NA
piRNAdb-piRNA_Match_Genome-rno-piR-24451	3.02222243074853	-4.17288663735889	2.28665579009083	-1.82488621831148	0.0680182013640615	NA
piRNAdb-piRNA_Match_Genome-rno-piR-23382	6.82908490988645	-3.08959956898992	1.69334808241255	-1.82455078260585	0.0680688463461719	NA
piRNAdb-piRNA_Match_Genome-rno-piR-44646	2.43568976445679	4.68383140647127	2.56745899612316	1.82430621620202	0.0681057911806788	NA
piRNAdb-piRNA_Match_Genome-rno-piR-8468	7.24975747763158	2.61060963713286	1.43131767261582	1.8239204944363	0.0681640928187708	NA
piRNAdb-piRNA_Match_Genome-rno-piR-20966	2.09485369505378	4.45380881109315	2.44279588878647	1.82324230671017	0.0682667000347542	NA
piRNAdb-piRNA_Match_Genome-rno-piR-22611	2.09485369505378	4.45380881109315	2.44279588878647	1.82324230671017	0.0682667000347542	NA
piRNAdb-piRNA_Match_Genome-rno-piR-34927	2.90095482434528	3.91110881173543	2.14631686468473	1.82224203522248	0.0684182690341897	NA
piRNAdb-piRNA_Match_Genome-rno-piR-29274	4.22164259086482	3.27879918105778	1.79956592736761	1.8219944772204	0.0684558236422945	NA
piRNAdb-piRNA_Match_Genome-rno-piR-18504	3.6600883391412	-4.47964796882064	2.45973052870483	-1.82119460507709	0.0685772802750508	NA
piRNAdb-piRNA_Match_Genome-rno-piR-33728	8.16633457677776	-3.02896684935249	1.66494505164977	-1.81925934813953	0.0688718722508559	NA
piRNAdb-piRNA_Match_Genome-rno-piR-30275	5.04593847208791	2.72914235327094	1.50016868816587	1.81922364784698	0.0688773164339521	NA
piRNAdb-piRNA_Match_Genome-rno-piR-16442	2.19056583209461	4.51596588609804	2.48244606771273	1.81915971703625	0.0688870665664583	NA
piRNAdb-piRNA_Match_Genome-rno-piR-16506	2.49693844365734	4.69949177859258	2.58417537786805	1.81856534151706	0.0689777694853048	NA
piRNAdb-piRNA_Match_Genome-rno-piR-48651	2.22260776725256	4.52751312094925	2.49049281919166	1.81791856055973	0.0690765810329774	NA
piRNAdb-piRNA_Match_Genome-rno-piR-4207	3.70324423992319	-3.54044633358691	1.94797638219913	-1.81749961957444	0.069140646504923	NA
piRNAdb-piRNA_Match_Genome-rno-piR-28792	2.19008152755814	4.50852078314816	2.48341601759809	1.81545127807813	0.0694545869302895	NA
piRNAdb-piRNA_Match_Genome-rno-piR-11865	2.32000265862594	-4.82526654131508	2.65909233596405	-1.81462917855603	0.0695809153040242	NA
piRNAdb-piRNA_Match_Genome-rno-piR-58493	2.23630146116738	-4.79841318579663	2.64735933987437	-1.81252809678052	0.0699046366016737	NA
piRNAdb-piRNA_Match_Genome-rno-piR-8387	2.62407032184198	4.76605852681049	2.63376466596588	1.8095992358006	0.0703579585351326	NA
piRNAdb-piRNA_Match_Genome-rno-piR-10261	2.62407032184198	4.76605852681049	2.63376466596588	1.8095992358006	0.0703579585351326	NA
piRNAdb-piRNA_Match_Genome-rno-piR-8119	2.29460360482447	-4.81366701413734	2.66082670122883	-1.80908700740047	0.0704374872401543	NA
piRNAdb-piRNA_Match_Genome-rno-piR-19955	2.89173792947105	3.8207023011695	2.11303858715685	1.80815548016582	0.0705823053810849	NA
piRNAdb-piRNA_Match_Genome-rno-piR-29437	2.22515293420878	-4.78653911034956	2.64787017640299	-1.80769403009473	0.0706541342570293	NA
piRNAdb-piRNA_Match_Genome-rno-piR-45962	2.41832014605898	4.67073342986189	2.58642187323174	1.80586681476901	0.070939145783128	NA
piRNAdb-piRNA_Match_Genome-rno-piR-15026	3.35935946199992	4.04426533951111	2.24022637123185	1.80529315762284	0.0710288197987864	NA
piRNAdb-piRNA_Match_Genome-rno-piR-37902	2.54399911063422	4.72218082933552	2.61623732945751	1.80495124664959	0.0710823114701909	NA
piRNAdb-piRNA_Match_Genome-rno-piR-59392	2.54399911063422	4.72218082933552	2.61623732945751	1.80495124664959	0.0710823114701909	NA
piRNAdb-piRNA_Match_Genome-rno-piR-19879	2.22256923660169	-4.79539790027853	2.66161777383104	-1.80168540630693	0.0715949154318659	NA
piRNAdb-piRNA_Match_Genome-rno-piR-922	2.07859057520657	4.44415684226391	2.46834296711791	1.80046164632178	0.0717877744058485	NA
piRNAdb-piRNA_Match_Genome-rno-piR-1426	2.21400440725018	-4.774480456711	2.65363584592675	-1.79922217437622	0.0719835431443779	NA
piRNAdb-piRNA_Match_Genome-rno-piR-52963	2.71241679930195	-5.05507848573407	2.81147314885215	-1.79801770036393	0.072174202849264	NA
piRNAdb-piRNA_Match_Genome-rno-piR-9290	2.71241679930195	-5.05507848573407	2.81147314885215	-1.79801770036393	0.072174202849264	NA
piRNAdb-piRNA_Match_Genome-rno-piR-39022	2.71241679930195	-5.05507848573407	2.81147314885215	-1.79801770036393	0.072174202849264	NA
piRNAdb-piRNA_Match_Genome-rno-piR-36141	2.71241679930195	-5.05507848573407	2.81147314885215	-1.79801770036393	0.072174202849264	NA
piRNAdb-piRNA_Match_Genome-rno-piR-10442	2.71241679930195	-5.05507848573407	2.81147314885215	-1.79801770036393	0.072174202849264	NA
piRNAdb-piRNA_Match_Genome-rno-piR-13214	2.71241679930195	-5.05507848573407	2.81147314885215	-1.79801770036393	0.072174202849264	NA
piRNAdb-piRNA_Match_Genome-rno-piR-30399	2.71241679930195	-5.05507848573407	2.81147314885215	-1.79801770036393	0.072174202849264	NA
piRNAdb-piRNA_Match_Genome-rno-piR-9548	2.71241679930195	-5.05507848573407	2.81147314885215	-1.79801770036393	0.072174202849264	NA
miRBase-miRNA_Match_Genome-rno-mir-383	5.7751653922335	-1.76437738035426	1.25860611361322	-1.40185031780043	0.160959949039703	NA
piRNAdb-piRNA_Match_Genome-rno-piR-10767	2.3864161003787	4.65237172774184	2.59190376554697	1.79496314237579	0.0726595725026902	NA
piRNAdb-piRNA_Match_Genome-rno-piR-51279	2.14191436203066	4.47843128047946	2.49635786462365	1.79398608827049	0.0728153893392279	NA
piRNAdb-piRNA_Match_Genome-rno-piR-2911	9.97423973729208	2.2011337082745	1.22707582462834	1.79380415137849	0.0728444341164028	NA
piRNAdb-piRNA_Match_Genome-rno-piR-47673	2.93075563581507	-4.17927664932764	2.3299925320121	-1.79368671440271	0.0728631870298258	NA
piRNAdb-piRNA_Match_Genome-rno-piR-33010	2.87499050508738	3.80567772890141	2.12232730968765	1.79316249267014	0.0729469455180103	NA
piRNAdb-piRNA_Match_Genome-rno-piR-55365	2.09436939051731	4.44582440914912	2.47973144688664	1.79286527770213	0.0729944685717076	NA
piRNAdb-piRNA_Match_Genome-rno-piR-21649	2.62302990435204	-5.03880961485645	2.81098453325325	-1.79254263239395	0.0730460864723747	NA
piRNAdb-piRNA_Match_Genome-rno-piR-19450	2.62302990435204	-5.03880961485645	2.81098453325325	-1.79254263239395	0.0730460864723747	NA
piRNAdb-piRNA_Match_Genome-rno-piR-53246	5.94215284099517	2.58843893775013	1.44431227860229	1.79216016930566	0.0731073129070984	NA
piRNAdb-piRNA_Match_Genome-rno-piR-12459	2.08080357230778	4.45690587159626	2.4919490958856	1.78852203640714	0.0736918236266066	NA
piRNAdb-piRNA_Match_Genome-rno-piR-15685	2.12724204527052	4.48255587958492	2.50862073311856	1.78686073203759	0.0739600005688349	NA
piRNAdb-piRNA_Match_Genome-rno-piR-46911	6.31577573314306	-2.88914320000997	1.61690118904695	-1.78683967800958	0.0739634043390907	NA
piRNAdb-piRNA_Match_Genome-rno-piR-32331	2.20285588029158	-4.76230486498207	2.6652906686185	-1.78678630479373	0.0739720336733439	NA
piRNAdb-piRNA_Match_Genome-rno-piR-31420	2.46392789942646	4.67733936441061	2.61893330873783	1.78597116192501	0.0741039275474861	NA
piRNAdb-piRNA_Match_Genome-rno-piR-1640	2.4156228444213	4.65640254038647	2.6082634034717	1.78525011476549	0.0742207564581424	NA
piRNAdb-piRNA_Match_Genome-rno-piR-47507	2.4156228444213	4.65640254038647	2.6082634034717	1.78525011476549	0.0742207564581424	NA
piRNAdb-piRNA_Match_Genome-rno-piR-26994	2.35451205469842	4.63377261777533	2.59946093883299	1.78258982412547	0.0746530974981124	NA
piRNAdb-piRNA_Match_Genome-rno-piR-17879	4.06117612061365	3.25314139983537	1.82567229063944	1.78188682411123	0.0747676895999223	NA
piRNAdb-piRNA_Match_Genome-rno-piR-19451	2.41513853988483	4.65091775358443	2.61018309008878	1.78183583030807	0.074776007400543	NA
piRNAdb-piRNA_Match_Genome-rno-piR-12885	2.41513853988483	4.65091775358443	2.61018309008878	1.78183583030807	0.074776007400543	NA
piRNAdb-piRNA_Match_Genome-rno-piR-57589	2.04620222498983	4.41437661665937	2.47780384829331	1.78156823014863	0.0748196691105008	NA
piRNAdb-piRNA_Match_Genome-rno-piR-38134	2.84357076394357	3.79636222716822	2.13412725468326	1.77888278163228	0.0752589815694279	NA
piRNAdb-piRNA_Match_Genome-rno-piR-1340	9.29909142315399	2.12214488348554	1.19426886862583	1.77694063643085	0.0755780074977533	NA
piRNAdb-piRNA_Match_Genome-rno-piR-35051	5.97460442080423	-3.08562787860337	1.73654540532165	-1.77687716609508	0.0755884520306068	NA
piRNAdb-piRNA_Match_Genome-rno-piR-36003	2.38876698695759	4.65456774533795	2.62143683231584	1.77557883064685	0.0758023617697153	NA
piRNAdb-piRNA_Match_Genome-rno-piR-25767	2.11443631055281	4.48184622758473	2.5249480438993	1.77502512909667	0.075893738050839	NA
piRNAdb-piRNA_Match_Genome-rno-piR-33769	7.35519061819825	-2.27435980960289	1.28381150815923	-1.77156833004554	0.07646624070969	NA
piRNAdb-piRNA_Match_Genome-rno-piR-11838	2.67686642109152	3.80597079866585	2.14908412814103	1.77097338760677	0.0765651272475363	NA
piRNAdb-piRNA_Match_Genome-rno-piR-60557	2.19170735333298	-4.75010352013373	2.68561622319638	-1.76872014664859	0.0769405884687712	NA
piRNAdb-piRNA_Match_Genome-rno-piR-4895	4.8309290742307	2.85272529273398	1.61294236999274	1.76864675750742	0.0769528426114201	NA
piRNAdb-piRNA_Match_Genome-rno-piR-22604	4.4578924783337	-2.85630787408618	1.61590487861221	-1.7676212949733	0.0771242355515252	NA
piRNAdb-piRNA_Match_Genome-rno-piR-39606	5.43202942312897	-2.79784093019047	1.58314163451674	-1.7672713983323	0.0771827874294557	NA
piRNAdb-piRNA_Match_Genome-rno-piR-42301	2.76522824530055	3.75978252796862	2.13085224091614	1.76445013679228	0.0776562233837033	NA
piRNAdb-piRNA_Match_Genome-rno-piR-790	2.06232745535936	4.43438570065216	2.51444233461128	1.7635662745623	0.0778050299787986	NA
piRNAdb-piRNA_Match_Genome-rno-piR-14956	2.06232745535936	4.43438570065216	2.51444233461128	1.7635662745623	0.0778050299787986	NA
piRNAdb-piRNA_Match_Genome-rno-piR-35184	7.14263638248001	-2.19154089381418	1.2441449500122	-1.76148357455672	0.0781565906784237	NA
piRNAdb-piRNA_Match_Genome-rno-piR-43410	2.3838566882187	4.63127836206957	2.63091231033012	1.76033170846673	0.0783515809164085	NA
piRNAdb-piRNA_Match_Genome-rno-piR-15574	3.45144089304105	-4.39193481294558	2.49533696219531	-1.76005680975515	0.0783981748078387	NA
piRNAdb-piRNA_Match_Genome-rno-piR-13739	2.36745567889381	4.62893773210955	2.63107010947609	1.75933652069472	0.078520366996257	NA
piRNAdb-piRNA_Match_Genome-rno-piR-14249	3.34282056319736	4.0474724808312	2.30137574633605	1.75871866524841	0.0786253054652403	NA
piRNAdb-piRNA_Match_Genome-rno-piR-23294	2.83746637608666	-4.10964736049911	2.33737806838252	-1.7582296232218	0.0787084467544332	NA
piRNAdb-piRNA_Match_Genome-rno-piR-41237	7.15268184278799	-2.69193332803069	1.53209293372478	-1.75703005266538	0.0789126868725158	NA
piRNAdb-piRNA_Match_Genome-rno-piR-29601	2.33714243630061	4.6201554698554	2.63164119758491	1.7556175492675	0.0791537336572872	NA
piRNAdb-piRNA_Match_Genome-rno-piR-27963	2.33679602124182	4.60774561772942	2.62540473290321	1.75506106162691	0.0792488637733121	NA
piRNAdb-piRNA_Match_Genome-rno-piR-47162	8.88865042629979	-1.89206490849007	1.07810272646132	-1.75499501304523	0.07926016077665	NA
piRNAdb-piRNA_Match_Genome-rno-piR-29833	5.72624478273647	-2.91507486495401	1.66103671185861	-1.75497317075683	0.0792638969876325	NA
piRNAdb-piRNA_Match_Genome-rno-piR-28662	2.14455373663449	-4.74628167412897	2.71168713150823	-1.75030578527291	0.080065563176797	NA
piRNAdb-piRNA_Match_Genome-rno-piR-20283	2.30523839062033	4.60114530934931	2.63298594825928	1.74750089813096	0.0805504892512156	NA
piRNAdb-piRNA_Match_Genome-rno-piR-10465	2.85976343000386	-4.12914716512961	2.36499893770097	-1.74594038893885	0.0808213107165777	NA
piRNAdb-piRNA_Match_Genome-rno-piR-24805	2.50898512590195	-4.97491407160281	2.85018193807572	-1.74547245743954	0.0809026626926434	NA
piRNAdb-piRNA_Match_Genome-rno-piR-627	3.99993243323688	-3.38390768523602	1.93880932718632	-1.74535352073373	0.0809233509624775	NA
piRNAdb-piRNA_Match_Genome-rno-piR-43855	2.10952601181391	4.45036897756711	2.5502493444865	1.7450720993963	0.0809723194875204	NA
piRNAdb-piRNA_Match_Genome-rno-piR-4732	2.10952601181391	4.45036897756711	2.5502493444865	1.7450720993963	0.0809723194875204	NA
piRNAdb-piRNA_Match_Genome-rno-piR-2798	9.86755398048984	-2.16682512546932	1.24168939212452	-1.74506212198681	0.0809740560412325	NA
piRNAdb-piRNA_Match_Genome-rno-piR-11024	3.79805084610413	-3.79081351326667	2.17610967600006	-1.74201399638763	0.0815059951779795	NA
piRNAdb-piRNA_Match_Genome-rno-piR-44176	2.31880420882986	4.59513469016901	2.64035469561988	1.74034749868718	0.0817980183637798	NA
piRNAdb-piRNA_Match_Genome-rno-piR-47244	4.07879996740626	-3.68353720824368	2.11709005232856	-1.73990577500102	0.0818755644832945	NA
piRNAdb-piRNA_Match_Genome-rno-piR-19116	2.28973535426494	4.58407984768222	2.63710307803341	1.73830135267247	0.0821577281588934	NA
piRNAdb-piRNA_Match_Genome-rno-piR-3851	9.04815835753669	1.8518306717097	1.06590151615109	1.73733749661653	0.0823276166883856	NA
piRNAdb-piRNA_Match_Genome-rno-piR-8453	2.27333434494005	4.58187715944773	2.63759418479954	1.73714257707008	0.0823620076597255	NA
piRNAdb-piRNA_Match_Genome-rno-piR-31878	9.10734345685552	2.12125009339895	1.22200195096782	1.73588110208738	0.0825848599180079	NA
piRNAdb-piRNA_Match_Genome-rno-piR-2553	2.92163863135404	-4.09907371092404	2.36187126412262	-1.73551953198717	0.0826488249654624	NA
piRNAdb-piRNA_Match_Genome-rno-piR-51853	8.97184018230645	-6.78920828688762	3.91210450679373	-1.73543632975487	0.0826635498811196	NA
piRNAdb-piRNA_Match_Genome-rno-piR-30258	10.568067941726	1.76255348310443	1.01600871958498	1.73478184697509	0.0827794527129553	NA
piRNAdb-piRNA_Match_Genome-rno-piR-39975	7.28247112829907	-2.96589388944281	1.70973551925198	-1.73470917346351	0.0827923306381576	NA
piRNAdb-piRNA_Match_Genome-rno-piR-19453	5.00399239799964	2.86693130691648	1.65462629662703	1.73267602041667	0.0831532689543809	NA
piRNAdb-piRNA_Match_Genome-rno-piR-1567	2.43091735519557	4.65550780354441	2.69163413421997	1.72962132719184	0.0836979530619534	NA
piRNAdb-piRNA_Match_Genome-rno-piR-29810	8.52848961414994	2.10418369584579	1.21684141705515	1.72921768305526	0.0837701426906161	NA
piRNAdb-piRNA_Match_Genome-rno-piR-32898	2.13623596405007	-4.70461423006588	2.72212954790302	-1.72828447260714	0.0839372354846621	NA
piRNAdb-piRNA_Match_Genome-rno-piR-43560	2.69485823350348	3.81826262871671	2.2099714618754	1.72774295713145	0.0840343183230028	NA
piRNAdb-piRNA_Match_Genome-rno-piR-8086	2.1445295478915	-4.7099685717192	2.72736402535125	-1.72693066563149	0.0841801162698883	NA
piRNAdb-piRNA_Match_Genome-rno-piR-54891	3.7897572622627	-3.7895455871831	2.19876779687593	-1.72348603275316	0.0848006688328015	NA
piRNAdb-piRNA_Match_Genome-rno-piR-11645	2.56440685966702	3.73822732719027	2.16915129512192	1.72335942430432	0.0848235477294524	NA
piRNAdb-piRNA_Match_Genome-rno-piR-33822	3.86982847347046	-3.5707876797405	2.07323330103703	-1.7223279589202	0.0850101257168946	NA
piRNAdb-piRNA_Match_Genome-rno-piR-36586	1.98509143526695	4.39226564429468	2.55151407032108	1.72143500809383	0.0851719162195298	NA
piRNAdb-piRNA_Match_Genome-rno-piR-57628	2.35084614398781	4.60819771364342	2.67760207283735	1.72101663663574	0.0852478050254919	NA
piRNAdb-piRNA_Match_Genome-rno-piR-54421	2.35084614398781	4.60819771364342	2.67760207283735	1.72101663663574	0.0852478050254919	NA
piRNAdb-piRNA_Match_Genome-rno-piR-54704	3.05568415207487	3.91568977542067	2.27535996492383	1.72091002557116	0.0852671520484708	NA
piRNAdb-piRNA_Match_Genome-rno-piR-32642	6.30708106155217	2.61156117948981	1.51825705377707	1.72010475630121	0.0854134013305881	NA
piRNAdb-piRNA_Match_Genome-rno-piR-28593	5.29732138368287	2.97977753306255	1.73394185930198	1.71849910484432	0.0857056175888365	NA
piRNAdb-piRNA_Match_Genome-rno-piR-24147	3.62520981046276	-3.75871640754281	2.18824123352719	-1.71768831971245	0.0858534809741915	NA
piRNAdb-piRNA_Match_Genome-rno-piR-26663	8.44426224653381	-2.22721016974556	1.29712313568497	-1.71703835084974	0.0859721650012826	NA
piRNAdb-piRNA_Match_Genome-rno-piR-46510	2.38851449497318	-3.85159757951355	2.24374708523707	-1.71659168043291	0.0860538036482556	NA
piRNAdb-piRNA_Match_Genome-rno-piR-46511	2.38851449497318	-3.85159757951355	2.24374708523707	-1.71659168043291	0.0860538036482556	NA
piRNAdb-piRNA_Match_Genome-rno-piR-16607	2.5037693532018	-4.93939035751302	2.88093033600279	-1.71451225174931	0.0864346889128147	NA
piRNAdb-piRNA_Match_Genome-rno-piR-22509	2.5037693532018	-4.93939035751302	2.88093033600279	-1.71451225174931	0.0864346889128147	NA
piRNAdb-piRNA_Match_Genome-rno-piR-44990	2.5037693532018	-4.93939035751302	2.88093033600279	-1.71451225174931	0.0864346889128147	NA
piRNAdb-piRNA_Match_Genome-rno-piR-34127	2.5037693532018	-4.93939035751302	2.88093033600279	-1.71451225174931	0.0864346889128147	NA
piRNAdb-piRNA_Match_Genome-rno-piR-60619	2.5037693532018	-4.93939035751302	2.88093033600279	-1.71451225174931	0.0864346889128147	NA
piRNAdb-piRNA_Match_Genome-rno-piR-4875	2.5037693532018	-4.93939035751302	2.88093033600279	-1.71451225174931	0.0864346889128147	NA
piRNAdb-piRNA_Match_Genome-rno-piR-30708	2.5037693532018	-4.93939035751302	2.88093033600279	-1.71451225174931	0.0864346889128147	NA
piRNAdb-piRNA_Match_Genome-rno-piR-36041	2.5037693532018	-4.93939035751302	2.88093033600279	-1.71451225174931	0.0864346889128147	NA
piRNAdb-piRNA_Match_Genome-rno-piR-5483	2.5037693532018	-4.93939035751302	2.88093033600279	-1.71451225174931	0.0864346889128147	NA
piRNAdb-piRNA_Match_Genome-rno-piR-53373	1.93422696810179	4.33765798793669	2.53044725773884	1.71418628650365	0.0864945186440302	NA
piRNAdb-piRNA_Match_Genome-rno-piR-21154	5.75808779600125	-2.79275290263929	1.63161389314841	-1.71165060212274	0.0869610770530764	NA
piRNAdb-piRNA_Match_Genome-rno-piR-45163	2.11135521252579	-4.68891981257922	2.73992825492495	-1.71132941315197	0.0870203195582125	NA
piRNAdb-piRNA_Match_Genome-rno-piR-1231	11.6461529054759	-1.99834338156597	1.168137968682	-1.71070835392902	0.0871349647778171	NA
piRNAdb-piRNA_Match_Genome-rno-piR-52715	1.9974128654482	4.3845164092546	2.56312986349303	1.71061032517462	0.0871530716547643	NA
piRNAdb-piRNA_Match_Genome-rno-piR-41462	1.9974128654482	4.3845164092546	2.56312986349303	1.71061032517462	0.0871530716547643	NA
piRNAdb-piRNA_Match_Genome-rno-piR-33717	5.83992126209707	-3.11885230226994	1.82711020090797	-1.70698642080814	0.0878245763687819	NA
piRNAdb-piRNA_Match_Genome-rno-piR-39987	4.64786430569572	-2.86862260375421	1.68156734758363	-1.70592192330349	0.0880226173444588	NA
piRNAdb-piRNA_Match_Genome-rno-piR-61117	2.10591657180153	-4.69122346489127	2.75292579862909	-1.70408641861231	0.0883649435371533	NA
piRNAdb-piRNA_Match_Genome-rno-piR-4243	2.99728915540025	3.96183185948501	2.32872248530681	1.70128982069885	0.0888885784845865	NA
piRNAdb-piRNA_Match_Genome-rno-piR-15874	3.27469749262117	-4.29848422900902	2.52766798609107	-1.70057311825057	0.0890231755365803	NA
piRNAdb-piRNA_Match_Genome-rno-piR-192	2.70414153304975	4.81121961041469	2.83022007590043	1.69994540402799	0.0891411953952554	NA
piRNAdb-piRNA_Match_Genome-rno-piR-19127	2.27077493278005	4.55971088360908	2.68431702412295	1.69864842439722	0.08938544660838	NA
piRNAdb-piRNA_Match_Genome-rno-piR-37657	2.20966414305718	4.53527007938973	2.67000153721249	1.69860204804399	0.0893941903176543	NA
piRNAdb-piRNA_Match_Genome-rno-piR-33439	7.57731667470948	2.23221928253745	1.31497314071644	1.6975398306016	0.0895946474073305	NA
piRNAdb-piRNA_Match_Genome-rno-piR-24509	2.36907238417315	-3.8326902102723	2.2578357971476	-1.6975061760976	0.0896010044505689	NA
piRNAdb-piRNA_Match_Genome-rno-piR-23589	2.22371426580317	4.53489461548918	2.67210462335138	1.69712464693896	0.0896730973916572	NA
piRNAdb-piRNA_Match_Genome-rno-piR-18657	2.29353915445323	4.60280922734905	2.71228568579707	1.69702227588035	0.0896924491545973	NA
piRNAdb-piRNA_Match_Genome-rno-piR-27354	2.39494034745187	-4.90803257865438	2.89243359507217	-1.69685229317492	0.0897245893446944	NA
piRNAdb-piRNA_Match_Genome-rno-piR-31484	2.27112134783884	4.57237770509271	2.69520457114587	1.69648632762178	0.0897938172817113	NA
piRNAdb-piRNA_Match_Genome-rno-piR-61465	2.27112134783884	4.57237770509271	2.69520457114587	1.69648632762178	0.0897938172817113	NA
piRNAdb-piRNA_Match_Genome-rno-piR-22010	1.92017684535579	4.34111954351397	2.55933764338503	1.69618868176077	0.0898501532152876	NA
piRNAdb-piRNA_Match_Genome-rno-piR-14659	4.26773464876877	3.26550302554614	1.92546115636822	1.6959589211893	0.089893659841558	NA
piRNAdb-piRNA_Match_Genome-rno-piR-16198	3.36191328809844	3.19679139316395	1.88549794355461	1.69546267822347	0.0899876844712295	NA
piRNAdb-piRNA_Match_Genome-rno-piR-18090	2.79332849079254	3.7503557065562	2.2129231637426	1.69475188655597	0.090122498155796	NA
piRNAdb-piRNA_Match_Genome-rno-piR-4651	2.0193604312258	-4.65442560088572	2.7476355470913	-1.69397488171711	0.0902700562022482	NA
piRNAdb-piRNA_Match_Genome-rno-piR-45649	2.0193604312258	-4.65442560088572	2.7476355470913	-1.69397488171711	0.0902700562022482	NA
piRNAdb-piRNA_Match_Genome-rno-piR-4652	3.80070185069042	-3.58409074468283	2.11605976758575	-1.69375685865999	0.0903114950454194	NA
piRNAdb-piRNA_Match_Genome-rno-piR-26107	2.22406068086196	4.54800156583041	2.68675251784101	1.69275046199084	0.0905029756119703	NA
piRNAdb-piRNA_Match_Genome-rno-piR-19077	7.97836445485427	-6.61965573632224	3.91276962774464	-1.69180819882255	0.09068254984154	NA
piRNAdb-piRNA_Match_Genome-rno-piR-9444	5.41506127905276	-2.57087850135217	1.51993046620683	-1.69144481179334	0.0907518797923419	NA
piRNAdb-piRNA_Match_Genome-rno-piR-36193	2.0082119042672	-4.64131196565483	2.74472858636235	-1.69099122904755	0.0908384778321499	NA
piRNAdb-piRNA_Match_Genome-rno-piR-20506	7.95348370332998	-6.61518096062508	3.91278825940611	-1.69065651450026	0.0909024241561712	NA
piRNAdb-piRNA_Match_Genome-rno-piR-28100	2.60287282578381	3.66009229856417	2.16557537610336	1.69012463798419	0.0910041122138165	NA
piRNAdb-piRNA_Match_Genome-rno-piR-33155	7.9286029518057	-6.61069249044993	3.91280700609117	-1.68950129156866	0.0911234045584347	NA
piRNAdb-piRNA_Match_Genome-rno-piR-5899	7.9286029518057	-6.61069249044993	3.91280700609117	-1.68950129156866	0.0911234045584347	NA
piRNAdb-piRNA_Match_Genome-rno-piR-39055	1.88495330402369	4.2966173431189	2.54773119546433	1.68644845687335	0.0917094548594109	NA
piRNAdb-piRNA_Match_Genome-rno-piR-12010	1.80810509877557	-4.46464080136713	2.64866616249161	-1.6856185443798	0.0918692950461826	NA
piRNAdb-piRNA_Match_Genome-rno-piR-24852	3.34343717115001	3.17883245242531	1.88880498761685	1.68298605375673	0.0923777912461543	NA
piRNAdb-piRNA_Match_Genome-rno-piR-13749	2.28786877222251	4.58713793885641	2.72591782317577	1.68278658287367	0.0924164133111926	NA
piRNAdb-piRNA_Match_Genome-rno-piR-56307	2.28786877222251	4.58713793885641	2.72591782317577	1.68278658287367	0.0924164133111926	NA
piRNAdb-piRNA_Match_Genome-rno-piR-26981	2.60397932433442	3.66631840563516	2.18081598025079	1.68116816771195	0.0927302546461838	NA
piRNAdb-piRNA_Match_Genome-rno-piR-26934	2.97734163343186	3.87963475930838	2.30798150997291	1.68096440224684	0.0927698292017246	NA
piRNAdb-piRNA_Match_Genome-rno-piR-56224	2.14571816221895	4.50207799347722	2.67909279281103	1.6804486972448	0.0928700480537503	NA
piRNAdb-piRNA_Match_Genome-rno-piR-288	6.70469595552611	-2.75715173562293	1.64328770398803	-1.6778265479208	0.0933809650811125	NA
piRNAdb-piRNA_Match_Genome-rno-piR-3661	6.92773997038436	2.20014211037545	1.31133087584968	1.67779326399972	0.0933874648072096	NA
piRNAdb-piRNA_Match_Genome-rno-piR-57393	4.04191755295027	3.18825960922674	1.90189393044859	1.67636036804363	0.0936676268888054	NA
piRNAdb-piRNA_Match_Genome-rno-piR-7698	7.61753964229449	2.36270004511045	1.41097250980855	1.67451883625362	0.0940286756317846	NA
piRNAdb-piRNA_Match_Genome-rno-piR-3649	1.97503756890149	-4.6193683191384	2.75894737360829	-1.6743227374783	0.0940671882006663	NA
piRNAdb-piRNA_Match_Genome-rno-piR-10931	3.23032738582851	-4.25181176623588	2.540953937711	-1.67331320065805	0.0942656551011262	NA
piRNAdb-piRNA_Match_Genome-rno-piR-1930	4.74926841456596	3.41992184087335	2.04500029843569	1.67233317446917	0.0944586414211255	NA
piRNAdb-piRNA_Match_Genome-rno-piR-44420	1.90232292242151	4.3148103104919	2.58115741094328	1.67165717681475	0.0945919430376532	NA
piRNAdb-piRNA_Match_Genome-rno-piR-51101	2.7457835192792	3.72330812591915	2.22827750775544	1.67093556029728	0.0947344066719239	NA
piRNAdb-piRNA_Match_Genome-rno-piR-37498	8.31362402583716	-2.2914844945246	1.37172744204502	-1.67051006219454	0.0948184902931073	NA
piRNAdb-piRNA_Match_Genome-rno-piR-44599	2.19070372157228	4.50975883287514	2.7007560332774	1.66981348085798	0.0949562723415282	NA
piRNAdb-piRNA_Match_Genome-rno-piR-19435	2.66869251167257	-3.99205540391986	2.39150157880521	-1.6692673085812	0.0950644160045126	NA
piRNAdb-piRNA_Match_Genome-rno-piR-46878	7.52583001353017	2.21712249832765	1.32829622127213	1.66914763651459	0.095088124586194	NA
piRNAdb-piRNA_Match_Genome-rno-piR-13291	2.17381840771093	4.50114754340064	2.69754546814501	1.66860859123753	0.0951949751393641	NA
piRNAdb-piRNA_Match_Genome-rno-piR-17204	1.85353356287988	4.28239883710199	2.56665822071808	1.66847256971514	0.095221952767649	NA
piRNAdb-piRNA_Match_Genome-rno-piR-205	7.26899216460535	-6.48682675468482	3.88905733628019	-1.66796891734421	0.0953218972376243	NA
piRNAdb-piRNA_Match_Genome-rno-piR-34968	1.86869018417648	4.28590158303066	2.56967256586106	1.66787848380773	0.0953398517072802	NA
piRNAdb-piRNA_Match_Genome-rno-piR-30800	2.12834854382113	4.48718845772186	2.69463188522566	1.6652324506084	0.0958663891760622	NA
piRNAdb-piRNA_Match_Genome-rno-piR-3608	9.28712827002034	-2.12311443458351	1.27568531339529	-1.6642932330488	0.0960538440600895	NA
piRNAdb-piRNA_Match_Genome-rno-piR-20619	4.75274568009937	-3.47833972917159	2.09032617855516	-1.66401768530489	0.0961088952164992	NA
piRNAdb-piRNA_Match_Genome-rno-piR-45145	2.38635132935737	-4.8671184650727	2.92616326038402	-1.6633106330622	0.0962502713601026	NA
piRNAdb-piRNA_Match_Genome-rno-piR-16865	2.38635132935737	-4.8671184650727	2.92616326038402	-1.6633106330622	0.0962502713601026	NA
piRNAdb-piRNA_Match_Genome-rno-piR-14761	2.38635132935737	-4.8671184650727	2.92616326038402	-1.6633106330622	0.0962502713601026	NA
piRNAdb-piRNA_Match_Genome-rno-piR-60106	2.38635132935737	-4.8671184650727	2.92616326038402	-1.6633106330622	0.0962502713601026	NA
piRNAdb-piRNA_Match_Genome-rno-piR-9210	2.38635132935737	-4.8671184650727	2.92616326038402	-1.6633106330622	0.0962502713601026	NA
piRNAdb-piRNA_Match_Genome-rno-piR-54544	2.66661261168902	-3.99841599140989	2.40581521386408	-1.66197967672998	0.0965168494795123	NA
piRNAdb-piRNA_Match_Genome-rno-piR-28862	1.83678613849621	4.26199773648414	2.56704439505913	1.66027426120379	0.0968592912148556	NA
piRNAdb-piRNA_Match_Genome-rno-piR-10124	1.99644425637527	4.36916913402656	2.63211008190258	1.65994924151059	0.0969246641878808	NA
piRNAdb-piRNA_Match_Genome-rno-piR-17549	4.62994149021603	2.59652840371885	1.56475288542033	1.65938559878186	0.0970381163522653	NA
piRNAdb-piRNA_Match_Genome-rno-piR-41122	4.04178873641871	-3.33308318998173	2.00942532403991	-1.65872458662989	0.0971713026659679	NA
piRNAdb-piRNA_Match_Genome-rno-piR-26349	3.67438526556947	-3.23968770768395	1.95323779776674	-1.65862431670536	0.0971915186579732	NA
piRNAdb-piRNA_Match_Genome-rno-piR-22206	2.26966843422944	4.55589109064584	2.74694251972202	1.65853164306725	0.0972102061092512	NA
piRNAdb-piRNA_Match_Genome-rno-piR-53715	2.26966843422944	4.55589109064584	2.74694251972202	1.65853164306725	0.0972102061092512	NA
piRNAdb-piRNA_Match_Genome-rno-piR-37985	7.2617791008335	-2.52367291645627	1.5222552340664	-1.65785136419914	0.0973474709170739	NA
piRNAdb-piRNA_Match_Genome-rno-piR-26109	3.81409683431386	2.85682247809117	1.72371002716287	1.65736837001136	0.0974450221834288	NA
piRNAdb-piRNA_Match_Genome-rno-piR-28119	1.87200967982831	4.30728349051299	2.5989674434639	1.65730567396883	0.0974576907515353	NA
piRNAdb-piRNA_Match_Genome-rno-piR-53772	1.8216295171996	4.25856502586982	2.57506992756474	1.65376675028672	0.0981749141717187	NA
piRNAdb-piRNA_Match_Genome-rno-piR-53771	1.8216295171996	4.25856502586982	2.57506992756474	1.65376675028672	0.0981749141717187	NA
piRNAdb-piRNA_Match_Genome-rno-piR-39343	2.17333410317447	4.49521751292823	2.72392043915868	1.65027489360763	0.0988867248688548	NA
piRNAdb-piRNA_Match_Genome-rno-piR-5350	2.5997698274234	-4.00226583368971	2.42644364055702	-1.64943696477983	0.0990581470775402	NA
piRNAdb-piRNA_Match_Genome-rno-piR-48810	5.62750010112215	-2.60280266204666	1.57807089211466	-1.64935724690976	0.0990744679860889	NA
piRNAdb-piRNA_Match_Genome-rno-piR-9194	4.65104544498011	-2.45295062504584	1.48775634017192	-1.64875830726582	0.0991971595663262	NA
piRNAdb-piRNA_Match_Genome-rno-piR-37024	7.0940131674051	-6.45004912225867	3.9135177349471	-1.64814613325008	0.0993226874474781	NA
piRNAdb-piRNA_Match_Genome-rno-piR-39258	4.30244024366818	-3.61471002522004	2.19444930310383	-1.64720598471216	0.0995157141230375	NA
GtRNAdb-mature-tRNA_3_end_Match_Genome-mature-tRNA-Leu-TAA_3_end	5.37678080494041	1.92688729486555	1.42612536802139	1.35113457629529	0.17665232728286	NA
piRNAdb-piRNA_Match_Genome-rno-piR-9510	6.95954140289465	-2.43410064602233	1.47818920126496	-1.64667732922102	0.0996243864555238	NA
piRNAdb-piRNA_Match_Genome-rno-piR-49844	2.28089556900178	-4.83790338926614	2.93812810956509	-1.64659375250396	0.0996415754499984	NA
piRNAdb-piRNA_Match_Genome-rno-piR-45950	2.7439940081039	3.85509559024806	2.34348339467831	1.64502790973573	0.0999640556193878	NA
piRNAdb-piRNA_Match_Genome-rno-piR-24010	3.41393028926955	-3.62608597974505	2.20566287968786	-1.64398921210398	0.100178430755045	NA
piRNAdb-piRNA_Match_Genome-rno-piR-31137	2.41831455999749	3.64338985622298	2.21705107822278	1.64334953398709	0.100310635164318	NA
piRNAdb-piRNA_Match_Genome-rno-piR-36882	1.86820587964002	4.27704909626984	2.60474583053076	1.64202166911553	0.100585513435899	NA
piRNAdb-piRNA_Match_Genome-rno-piR-57991	1.86820587964002	4.27704909626984	2.60474583053076	1.64202166911553	0.100585513435899	NA
piRNAdb-piRNA_Match_Genome-rno-piR-531	7.65044183591462	1.94779463915342	1.18666678249721	1.64139981659764	0.100714447939087	NA
piRNAdb-piRNA_Match_Genome-rno-piR-36361	5.60643136448076	2.59443409717529	1.5809355517323	1.64107518129532	0.10078180992128	NA
piRNAdb-piRNA_Match_Genome-rno-piR-56134	3.11421721204851	-4.19857091640274	2.56313899761625	-1.63805822482021	0.101409548380316	NA
piRNAdb-piRNA_Match_Genome-rno-piR-39514	3.91810517041745	3.15207263627681	1.92441780665702	1.63793570469626	0.10143510680291	NA
piRNAdb-piRNA_Match_Genome-rno-piR-242	2.06454045246057	4.44515530017328	2.71535799079824	1.63704208256773	0.101621676853645	NA
piRNAdb-piRNA_Match_Genome-rno-piR-61707	2.11063251036452	4.45816345615449	2.7238342089549	1.63672349862477	0.101688256706149	NA
piRNAdb-piRNA_Match_Genome-rno-piR-47019	2.92205117206426	3.82309493190386	2.3362633356405	1.63641438599033	0.101752890372489	NA
piRNAdb-piRNA_Match_Genome-rno-piR-31777	3.94558322189529	3.14903627607148	1.92469378629299	1.63612326204711	0.101813792610274	NA
piRNAdb-piRNA_Match_Genome-rno-piR-14788	4.79183532803828	2.69580125882946	1.64839240217665	1.63541232977642	0.101962639427918	NA
piRNAdb-piRNA_Match_Genome-rno-piR-46516	5.52367381951874	-3.2209914997909	1.97148985698508	-1.63378547872249	0.102303902481977	NA
piRNAdb-piRNA_Match_Genome-rno-piR-37732	3.06605004652102	-4.19865728486525	2.57085826708718	-1.63317337972987	0.102432536997809	NA
piRNAdb-piRNA_Match_Genome-rno-piR-27728	1.86917448871295	4.29496495748898	2.63065351045808	1.63266083519342	0.102540348799843	NA
piRNAdb-piRNA_Match_Genome-rno-piR-35385	3.57281623232112	-3.70376503049265	2.26904415004146	-1.63230187937285	0.102615907533555	NA
piRNAdb-piRNA_Match_Genome-rno-piR-25750	2.1576931773414	4.48448738334851	2.7480865259433	1.63185814602733	0.102709372800049	NA
piRNAdb-piRNA_Match_Genome-rno-piR-31147	2.1576931773414	4.48448738334851	2.7480865259433	1.63185814602733	0.102709372800049	NA
piRNAdb-piRNA_Match_Genome-rno-piR-10630	1.90531565277571	-4.56978968407461	2.80206996583472	-1.63086209116599	0.102919422282882	NA
piRNAdb-piRNA_Match_Genome-rno-piR-36708	3.5617943735625	3.56643318908713	2.18874134305057	1.62944479502379	0.103218892470558	NA
piRNAdb-piRNA_Match_Genome-rno-piR-56337	1.91646417973431	-4.58337448216406	2.81309945209159	-1.62929699437261	0.103250162130827	NA
piRNAdb-piRNA_Match_Genome-rno-piR-14725	1.96361779643281	-4.58719182942339	2.8169901344069	-1.62840180851013	0.103439714412755	NA
piRNAdb-piRNA_Match_Genome-rno-piR-59481	10.3454963964215	-1.64770976223282	1.01234774726576	-1.62761241547986	0.103607094876279	NA
piRNAdb-piRNA_Match_Genome-rno-piR-6413	1.89416712581711	-4.55579106035348	2.80079542866317	-1.62660614685735	0.103820772990996	NA
piRNAdb-piRNA_Match_Genome-rno-piR-28010	5.92865322321812	-2.88472805628957	1.77370992289363	-1.6263809651487	0.103868637566381	NA
piRNAdb-piRNA_Match_Genome-rno-piR-48597	2.29512190710165	-4.81363882194938	2.96064790299834	-1.62587345056279	0.10397657905067	NA
piRNAdb-piRNA_Match_Genome-rno-piR-22437	2.29512190710165	-4.81363882194938	2.96064790299834	-1.62587345056279	0.10397657905067	NA
piRNAdb-piRNA_Match_Genome-rno-piR-27658	2.29512190710165	-4.81363882194938	2.96064790299834	-1.62587345056279	0.10397657905067	NA
piRNAdb-piRNA_Match_Genome-rno-piR-22071	2.29512190710165	-4.81363882194938	2.96064790299834	-1.62587345056279	0.10397657905067	NA
piRNAdb-piRNA_Match_Genome-rno-piR-35403	2.29512190710165	-4.81363882194938	2.96064790299834	-1.62587345056279	0.10397657905067	NA
piRNAdb-piRNA_Match_Genome-rno-piR-30314	2.29512190710165	-4.81363882194938	2.96064790299834	-1.62587345056279	0.10397657905067	NA
piRNAdb-piRNA_Match_Genome-rno-piR-19906	2.29512190710165	-4.81363882194938	2.96064790299834	-1.62587345056279	0.10397657905067	NA
piRNAdb-piRNA_Match_Genome-rno-piR-45932	2.29512190710165	-4.81363882194938	2.96064790299834	-1.62587345056279	0.10397657905067	NA
piRNAdb-piRNA_Match_Genome-rno-piR-32978	2.51098856640334	4.70401296334577	2.89407127184274	1.62539637814469	0.104078127145286	NA
piRNAdb-piRNA_Match_Genome-rno-piR-32795	2.51098856640334	4.70401296334577	2.89407127184274	1.62539637814469	0.104078127145286	NA
piRNAdb-piRNA_Match_Genome-rno-piR-45937	2.51098856640334	4.70401296334577	2.89407127184274	1.62539637814469	0.104078127145286	NA
piRNAdb-piRNA_Match_Genome-rno-piR-18272	2.11097892542331	4.47203152027544	2.7524854279639	1.62472486678469	0.104221196369424	NA
piRNAdb-piRNA_Match_Genome-rno-piR-13811	4.32228216342504	2.8787715182631	1.77331181266851	1.6233870984771	0.104506680920142	NA
piRNAdb-piRNA_Match_Genome-rno-piR-43869	3.46585495793393	-3.06270713088224	1.88728517261182	-1.62281099609539	0.104629814379458	NA
piRNAdb-piRNA_Match_Genome-rno-piR-18274	2.06357184338764	4.43193677881767	2.73175720229561	1.6223758008557	0.104722907356708	NA
piRNAdb-piRNA_Match_Genome-rno-piR-27917	3.2384813672781	-3.57189188790635	2.20292921679248	-1.62142835125094	0.1049258045237	NA
piRNAdb-piRNA_Match_Genome-rno-piR-18898	3.00143378458584	3.29544819698939	2.03291876113738	1.62104273913319	0.10500847299594	NA
piRNAdb-piRNA_Match_Genome-rno-piR-9098	5.28839831034537	-2.98320373083789	1.84142826750846	-1.62004884114998	0.105221785651116	NA
piRNAdb-piRNA_Match_Genome-rno-piR-8388	2.46475861902171	4.69349567410848	2.89734991054489	1.61992711236794	0.105247934981878	NA
piRNAdb-piRNA_Match_Genome-rno-piR-19109	5.69779025271604	2.3173178466155	1.43062281960081	1.61979650741353	0.105275996794165	NA
piRNAdb-piRNA_Match_Genome-rno-piR-18414	2.36209220825337	-3.79542465044954	2.34396816775957	-1.61923045826911	0.105397686889468	NA
piRNAdb-piRNA_Match_Genome-rno-piR-24526	7.76877471908946	1.85204396501471	1.14432365617622	1.6184616607537	0.105563142845209	NA
[truncated: 24,563 more rows]

## Sheet: ALL DEG baseMean>200
	baseMean	log2FoldChange	lfcSE	stat	pvalue	padj
miRBase-miRNA_Match_Genome-rno-mir-296	214.299	-1.60368864764578	0.407733126227981	-3.93318213430881	8.38286700130911e-05	0.0010404156427793
miRBase-miRNA_Match_Genome-rno-mir-3068	218.934	1.25575845813609	0.402794240469638	3.11761771139513	0.00182319124012755	0.0146904970742746
GtRNAdb-mature-tRNA_3_end_Match_Genome-mature-tRNA-Pro-TGG_3_end	227.269	1.69637039760044	0.4033025169434	4.20619839037234	2.59702276305488e-05	0.000355551157663596
miRBase-miRNA_Match_Genome-rno-mir-107	246.385	-2.67973856919678	0.407225367066069	-6.58048045607634	4.68930472114278e-11	3.5579712990438e-09
miRBase-miRNA_Match_Genome-rno-mir-190b	252.71	-1.00818062445917	0.364907217403967	-2.76284100827493	0.00573006707656677	0.0390232260393881
miRBase-miRNA_Match_Genome-rno-mir-339	259.95	-1.72785208230474	0.357769853013603	-4.82950720344524	1.36871363285707e-06	2.79638723759107e-05
GtRNAdb-mature-tRNA_3_end_Match_Genome-mature-tRNA-Ala-TGC_3_end	264.974	2.72195265108964	0.440249504494371	6.18275006173105	6.29944110012771e-10	3.21756068498831e-08
GtRNAdb-mature-tRNA_3_end_Match_Genome-mature-tRNA-Leu-CAG_3_end	266.549	1.72127537408561	0.406278419853349	4.23668915200302	2.26839832992755e-05	0.000317098208646714
GtRNAdb-mature-tRNA_3_end_Match_Genome-mature-tRNA-Pro-AGG_3_end	267.096	1.70526089655949	0.395127586891711	4.31572219488394	1.59081943054044e-05	0.00024277828989773
miRBase-miRNA_Match_Genome-rno-mir-194-1	269.113	-3.52333207963312	0.441930970625539	-7.97258466553263	1.55389709921247e-15	2.29286149750463e-13
GtRNAdb-mature-tRNA_3_end_Match_Genome-mature-tRNA-Glu-CTC_3_end	275.92	1.84566042415737	0.341997077715062	5.39671402015633	6.78724395931251e-08	2.04851363135614e-06
miRBase-miRNA_Match_Genome-rno-mir-361	277.628	-1.55000927657743	0.328442791663489	-4.71926714764232	2.36695810272141e-06	4.36572272279726e-05
miRBase-miRNA_Match_Genome-rno-mir-181b-1	281.143	-1.62861265933574	0.356915450920211	-4.563020892306	5.04227948572258e-06	8.26684834202418e-05
piRNAdb-piRNA_Match_Genome-rno-piR-61384	286.875	2.91382951415711	0.451766772416818	6.44985353519689	1.11958297502481e-10	7.82529574122607e-09
rRNAdb-rRNA_Unmatch_Genome-18S-rRNA	304.059	-7.27200347966057	1.81293196530599	-4.01118388269643	6.04150310545791e-05	0.000764106297528391
miRBase-miRNA_Match_Genome-rno-mir-148b	305.043	-1.08273153350848	0.347046587220504	-3.11984492393391	0.00180946273915173	0.0146904970742746
GtRNAdb-mature-tRNA_CCA_end_Match_Genome-mature-tRNA-Gly-TCC_CCA_end	321.992	-1.73648493184623	0.339966448848961	-5.10781266129502	3.2590953240062e-07	8.01496035237079e-06
miRBase-miRNA_Match_Genome-rno-mir-181b-2	325.005	-1.3782125121911	0.373238995587574	-3.69257373555365	0.000221995945967855	0.00239683427841716
miRBase-miRNA_Match_Genome-rno-mir-328a	330.237	-1.39780935012609	0.367067678189634	-3.80804258500787	0.000140071155314751	0.00158986747229051
GtRNAdb-mature-tRNA_CCA_end_Unmatch_Genome-mature-tRNA-Ser-CGA_CCA_end	333.659	-2.08874476566553	0.327389108297792	-6.38000688699032	1.77080020124142e-10	1.03974424096647e-08
GtRNAdb-mature-tRNA_CCA_end_Match_Genome-mature-tRNA-Gly-CCC_CCA_end	335.435	-1.31996223094963	0.328145944906596	-4.02248527351252	5.7587255855022e-05	0.000735344959379512
miRBase-miRNA_Match_Genome-rno-mir-218a-1	345.054	-1.65721402926823	0.373139906351129	-4.44126720584201	8.94306611299034e-06	0.000141385616643466
miRBase-miRNA_Match_Genome-rno-mir-218a-2	351.662	-1.69592298777381	0.370974152249017	-4.57153949269063	4.84154017028367e-06	8.03695668267089e-05
GtRNAdb-mature-tRNA_Unmatch_Genome-mature-tRNA-Ser-CGA	370.032	-1.99086994130098	0.319891059933271	-6.22358731036832	4.85914202297519e-10	2.58117624260442e-08
piRNAdb-piRNA_Match_Genome-rno-piR-61534	382.94	2.82731981831261	0.479679476070885	5.8941855121081	3.76533967849418e-09	1.56261596657508e-07
GtRNAdb-mature-tRNA_CCA_end_Unmatch_Genome-mature-tRNA-His-GTG_CCA_end	401.531	1.12029021199614	0.333277623351034	3.36143243201229	0.000775393252349822	0.00705289204877098
GtRNAdb-mature-tRNA_CCA_end_Unmatch_Genome-mature-tRNA-Arg-TCT_CCA_end	420.676	-1.06927030023636	0.34301332289488	-3.11728504074475	0.00182525001299345	0.0146904970742746
miRBase-miRNA_Match_Genome-rno-mir-196b-1	425.272	-1.77759534237603	0.372263667335979	-4.77509759439321	1.79620123644913e-06	3.50787535588888e-05
miRBase-miRNA_Match_Genome-rno-mir-196b-2	425.272	-1.77759534237603	0.372263667335979	-4.77509759439321	1.79620123644913e-06	3.50787535588888e-05
miRBase-miRNA_Match_Genome-rno-mir-152	428.999	-2.36675241064858	0.368775173388742	-6.41787349430294	1.38191012073403e-10	9.17588320167394e-09
miRBase-miRNA_Match_Genome-rno-mir-455	434.352	-4.02167844566192	0.443016282959224	-9.07794724563676	1.10641764874473e-19	2.09903233933287e-17
GtRNAdb-mature-tRNA_CCA_end_Unmatch_Genome-mature-tRNA-Leu-TAA_CCA_end	437.79	0.968427898554812	0.305403259403482	3.17098088752019	0.00151925138600332	0.012689093337185
GtRNAdb-mature-tRNA_CCA_end_Match_Genome-mature-tRNA-Ala-AGC_CCA_end	441.155	-2.83918837393162	0.417642031654777	-6.79813849837435	1.05979550193436e-11	1.00529173326345e-09
GtRNAdb-mature-tRNA_Unmatch_Genome-mature-tRNA-Leu-TAA	459.32	0.897819940772509	0.301192864810394	2.98088051102307	0.00287420916261696	0.0216872145906553
GtRNAdb-mature-tRNA_Match_Genome-mature-tRNA-Ile-TAT	501.958	-2.07341995144532	0.494273041762414	-4.19488779734413	2.73006696431707e-05	0.00036995193149113
GtRNAdb-mature-tRNA_5_end_Match_Genome-mature-tRNA-Phe-GAA_5_end	541.824	1.51990993190288	0.326199495565293	4.65944905668516	3.17056849150708e-06	5.54015125884394e-05
GtRNAdb-mature-tRNA_CCA_end_Match_Genome-mature-tRNA-Arg-CCT_CCA_end	548.698	-4.65176196926673	0.40241567995714	-11.559594222974	6.60200175623496e-31	2.92248611076001e-28
GtRNAdb-mature-tRNA_CCA_end_Match_Genome-mature-tRNA-His-GTG_CCA_end	561.565	-3.61890787324069	0.34475983794497	-10.4968951569653	8.92681058791774e-26	2.37096089215095e-23
GtRNAdb-mature-tRNA_CCA_end_Unmatch_Genome-mature-tRNA-Leu-TAG_CCA_end	570.93	0.997001689118795	0.317767636473596	3.13751803104606	0.0017038479387824	0.0140540997683417
GtRNAdb-mature-tRNA_Unmatch_Genome-mature-tRNA-Leu-TAG	591.494	1.0052961534118	0.31669829126764	3.17430242325568	0.00150197107426038	0.0126241619406189
rRNAdb-rRNA_Match_Genome-4.5S-rRNA	600.891	0.853961902073162	0.316714036555832	2.6963184561055	0.00701106031190927	0.0456406279128211
miRBase-miRNA_Match_Genome-rno-mir-223	605.869	-2.07075212527968	0.32325073998511	-6.40602439262804	1.49363078178458e-10	9.4454365629044e-09
GtRNAdb-mature-tRNA_CCA_end_Match_Genome-mature-tRNA-Leu-TAG_CCA_end	642.257	-1.13807506300152	0.353543690638369	-3.21905069482807	0.00128615744914444	0.0111635104082603
miRBase-miRNA_Match_Genome-rno-mir-92a-2	648.27	-0.972689716802422	0.313263416180653	-3.10502173749357	0.00190265041182424	0.015221203294594
GtRNAdb-mature-tRNA_CCA_end_Match_Genome-mature-tRNA-Gly-GCC_CCA_end	665.517	-1.3940656054746	0.300549625884678	-4.63838742560773	3.5113810669306e-06	6.05599228166732e-05
GtRNAdb-mature-tRNA_3_end_Match_Genome-mature-tRNA-Thr-TGT_3_end	669.657	2.368284103219	0.514335617050009	4.60455007335946	4.13358553373474e-06	7.03769434461504e-05
GtRNAdb-mature-tRNA_CCA_end_Match_Genome-mature-tRNA-Gln-TTG_CCA_end	710.825	-1.27285182226934	0.318041013388727	-4.0021625157935	6.27661603726686e-05	0.000786353405423622
miRBase-miRNA_Match_Genome-rno-mir-194-2	754.304	-3.95329438882929	0.357974965876029	-11.0434940028694	2.35686427230302e-28	7.82478938404602e-26
miRBase-miRNA_Match_Genome-rno-mir-342	784.813	-0.998376100470437	0.318986321196817	-3.12983985245697	0.00174901626496172	0.0143376148140072
GtRNAdb-mature-tRNA_CCA_end_Unmatch_Genome-mature-tRNA-Thr-AGT_CCA_end	797.733	-1.19357485683641	0.332255492118298	-3.59234048841981	0.000327721259569621	0.00334779871314198
GtRNAdb-mature-tRNA_CCA_end_Match_Genome-mature-tRNA-Ser-GCT_CCA_end	817.608	-1.6398286156194	0.345179230051622	-4.75065841990019	2.02755377623715e-06	3.90230639832309e-05
GtRNAdb-mature-tRNA_Unmatch_Genome-mature-tRNA-Thr-AGT	818.221	-1.15082515842125	0.329790108357996	-3.48956845355712	0.000483801130992689	0.00475916964413549
miRBase-miRNA_Match_Genome-rno-mir-142	824.325	-0.980018481050375	0.289767101474431	-3.38209022371316	0.000719365136861818	0.00658839242587927
miRBase-miRNA_Match_Genome-rno-mir-451	869.13	-1.06629387996969	0.299319742741307	-3.56239074043057	0.000367492869300275	0.00366940248444185
GtRNAdb-mature-tRNA_CCA_end_Match_Genome-mature-tRNA-Asn-GTT_CCA_end	902.274	-3.32580544104053	0.333553494922206	-9.97083074130643	2.04511017964624e-23	4.52651053095035e-21
miRBase-miRNA_Match_Genome-rno-mir-186	925.759	-1.11434439124292	0.337609438404417	-3.30069087081643	0.000964470850892501	0.00865417087827866
miRBase-miRNA_Match_Genome-rno-mir-203a	956.796	-1.33217148708055	0.380617176076223	-3.50002987467324	0.000465206018576272	0.00461039994529321
miRBase-miRNA_Match_Genome-rno-mir-195	1008.8	-1.50754684691658	0.308117138382038	-4.89277180371367	9.94256646239372e-07	2.09582988286649e-05
miRBase-miRNA_Match_Genome-rno-mir-196a	1024.47	-1.74385681165669	0.404302943576688	-4.31324292677558	1.60877180052713e-05	0.00024277828989773
rRNAdb-rRNA_Match_Genome-5.3S-rRNA	1039.1	1.24755900906638	0.3341315896405	3.73373559323935	0.000188660552780951	0.00207058854622399
miRBase-miRNA_Match_Genome-rno-mir-192	1065.89	-4.44037952841841	0.311264250382117	-14.2656264667956	3.58359297107899e-46	4.7590114655929e-43
miRBase-miRNA_Match_Genome-rno-mir-378a	1109.85	-3.56621398460802	0.285081275770678	-12.5094640992021	6.62697987348763e-36	4.40031463599578e-33
miRBase-miRNA_Match_Genome-rno-mir-320	1121.75	-1.77796568887223	0.364797234980485	-4.87384639570347	1.09446099737061e-06	2.27100656954402e-05
miRBase-miRNA_Match_Genome-rno-mir-27a	1133.06	-1.44991363867984	0.29252571242064	-4.95653399724028	7.17618153594886e-07	1.58832817995668e-05
miRBase-miRNA_Match_Genome-rno-mir-222	1296.84	-2.00678883790789	0.314670119734976	-6.37743691583447	1.80076186311963e-10	1.03974424096647e-08
GtRNAdb-mature-tRNA_CCA_end_Unmatch_Genome-mature-tRNA-Leu-AAG_CCA_end	1322.61	1.04998915404199	0.309646311569233	3.39093060311565	0.00069655736339566	0.00642770035982929
GtRNAdb-mature-tRNA_CCA_end_Match_Genome-mature-tRNA-Cys-GCA_CCA_end	1340.37	-1.61986516116958	0.346695016397822	-4.67230587275254	2.9783697208514e-06	5.34496620174414e-05
GtRNAdb-mature-tRNA_Unmatch_Genome-mature-tRNA-Leu-AAG	1372.68	1.05153144510506	0.30937959579991	3.39883902940108	0.000676725325488413	0.00632881149470854
GtRNAdb-mature-tRNA_CCA_end_Match_Genome-mature-tRNA-iMet-CAT_CCA_end	1396.92	-2.61809706667435	0.415268357114354	-6.30459080693547	2.88956272782663e-10	1.59889137606407e-08
miRBase-miRNA_Match_Genome-rno-mir-99b	1533.91	-2.11838131495916	0.29428974720149	-7.19828446319871	6.09748349265641e-13	6.74788173187309e-11
GtRNAdb-mature-tRNA_CCA_end_Match_Genome-mature-tRNA-Leu-AAG_CCA_end	1703.84	-0.894285402398234	0.325629626858086	-2.74632689607195	0.00602666804867337	0.0406264729372499
miRBase-miRNA_Match_Genome-rno-mir-140	1787.41	-1.06235971958723	0.289846145675776	-3.66525391293487	0.000247093308581922	0.00264628962739349
miRBase-miRNA_Match_Genome-rno-mir-100	2199.66	-2.04868692757022	0.344716681475276	-5.94310353303037	2.7967566510079e-09	1.19809446210919e-07
miRBase-miRNA_Match_Genome-rno-mir-181a-1	2212.16	-1.30854004596084	0.341260180500379	-3.83443519265028	0.000125853147849041	0.00144080155468557
miRBase-miRNA_Match_Genome-rno-mir-181a-2	2235.65	-1.30439287648965	0.337485442364911	-3.86503449555982	0.000111073500345431	0.00131668601484654
miRBase-miRNA_Match_Genome-rno-mir-103-1	2303.82	-0.977527564878229	0.306690270189168	-3.18734456191025	0.00143585611392952	0.0121453306961681
miRBase-miRNA_Match_Genome-rno-mir-103-2	2350.21	-0.951205344445829	0.309578316546264	-3.0725838781531	0.00212214183718221	0.0166757654424732
miRBase-miRNA_Match_Genome-rno-mir-24-1	2407.21	-1.48823422786035	0.395819668563003	-3.75987942505052	0.000169995270360664	0.00188128099199135
miRBase-miRNA_Match_Genome-rno-mir-204	2423.73	-1.00704162261133	0.276767420455039	-3.63858441486945	0.000274140771755177	0.00286660586528248
miRBase-miRNA_Match_Genome-rno-mir-221	2562.48	-1.82500907546834	0.306772371705013	-5.94906596485565	2.69676948121547e-09	1.19376995701805e-07
GtRNAdb-mature-tRNA_CCA_end_Match_Genome-mature-tRNA-Leu-CAA_CCA_end	2638.36	-3.40952663829009	0.397560673163226	-8.57611647339737	9.81301778754407e-18	1.62896095273232e-15
miRBase-miRNA_Match_Genome-rno-mir-24-2	2671.99	-1.43983591537153	0.379989488252907	-3.78914669979825	0.000151165630598539	0.00170125387656661
GtRNAdb-mature-tRNA_CCA_end_Match_Genome-mature-tRNA-Lys-CTT_CCA_end	2810.88	-1.30988043990545	0.27633388762219	-4.74020921276346	2.13497654434827e-06	4.05035550127786e-05
GtRNAdb-mature-tRNA_CCA_end_Match_Genome-mature-tRNA-Phe-GAA_CCA_end	2886.85	-0.897444095207695	0.323736259135807	-2.77214575099918	0.00556880958960238	0.0381205110051132
miRBase-miRNA_Match_Genome-rno-mir-126a	3248.37	-2.05023258399523	0.364239783645216	-5.62879914839901	1.81468558132854e-08	6.51324987028189e-07
GtRNAdb-mature-tRNA_CCA_end_Match_Genome-mature-tRNA-Gln-CTG_CCA_end	3327.65	-1.58831098883545	0.312555984624621	-5.08168477638658	3.741018599811e-07	8.87155839383752e-06
miRBase-miRNA_Match_Genome-rno-mir-30b	3778.81	-1.02816199001649	0.285543723255783	-3.60071647975076	0.000317341479550138	0.00326689523133785
miRBase-miRNA_Match_Genome-rno-mir-22	3808.31	-1.86644473309895	0.367680500892819	-5.07626792437119	3.84920428601022e-07	8.96797068740626e-06
miRBase-miRNA_Match_Genome-rno-mir-23b	3959.95	-1.35886037448204	0.267048858383497	-5.08843356495699	3.61033212860839e-07	8.7173110305308e-06
miRBase-miRNA_Match_Genome-rno-mir-199a	4001.17	-1.73948007903903	0.301856483994582	-5.76260630886514	8.2824839850365e-09	3.2350408035672e-07
GtRNAdb-mature-tRNA_CCA_end_Match_Genome-mature-tRNA-Lys-TTT_CCA_end	4193.76	-1.54440926084551	0.342085282434175	-4.51469075154581	6.34092261546659e-06	0.000102692015040727
miRBase-miRNA_Match_Genome-rno-mir-92a-1	4564.94	-1.46127984107038	0.278675132149731	-5.24366788596421	1.57415440644424e-07	4.2662796974652e-06
miRBase-miRNA_Match_Genome-rno-mir-146a	4734.2	-1.22134989186125	0.287428915661107	-4.24922415704785	2.14512180867986e-05	0.000303055506587963
GtRNAdb-mature-tRNA_CCA_end_Match_Genome-mature-tRNA-Leu-CAG_CCA_end	4772.99	-3.00786728073268	0.390136141232346	-7.70978887326756	1.26026050306814e-14	1.67362594807449e-12
GtRNAdb-mature-tRNA_5_end_Match_Genome-mature-tRNA-Leu-CAA_5_end	4822.16	0.85797245656405	0.292130426330007	2.93695000326613	0.00331457536605118	0.0245908161235529
GtRNAdb-mature-tRNA_CCA_end_Unmatch_Genome-mature-tRNA-Glu-CTC_CCA_end	4950.93	0.903073016151393	0.31712961728816	2.84764640992461	0.00440438297585485	0.0316163275239743
GtRNAdb-mature-tRNA_CCA_end_Unmatch_Genome-mature-tRNA-Val-CAC_CCA_end	4996	0.777964778474503	0.275912808110547	2.81960371394866	0.00480829897933642	0.0341466366019185
GtRNAdb-mature-tRNA_Unmatch_Genome-mature-tRNA-Val-CAC	5187.13	0.74728610321092	0.275820655748319	2.70931885497656	0.00674215104510156	0.044324636573737
GtRNAdb-mature-tRNA_5_end_Match_Genome-mature-tRNA-Ser-CGA_5_end	5218.68	0.861960992323393	0.265492708589633	3.24664657233849	0.00116773301821386	0.0102022990012369
GtRNAdb-mature-tRNA_Match_Genome-mature-tRNA-Ser-CGA	6161.05	0.804029941478098	0.268612106393374	2.99327514412407	0.00276000802832811	0.021066624388973
GtRNAdb-mature-tRNA_5_end_Match_Genome-mature-tRNA-Thr-TGT_5_end	6344.05	1.51516647639151	0.279930115902081	5.41265976870281	6.20954073885412e-08	1.91773723283681e-06
GtRNAdb-mature-tRNA_5_end_Match_Genome-mature-tRNA-SeC-TCA_5_end	6392.59	0.986139616175461	0.272801724992547	3.61485843318037	0.000300511787847132	0.00311780979891399
GtRNAdb-mature-tRNA_5_end_Match_Genome-mature-tRNA-Arg-TCT_5_end	6455.83	1.26797365056689	0.325087025100658	3.90041297456976	9.60287407864387e-05	0.00116996484187514
miRBase-miRNA_Match_Genome-rno-mir-27b	6944.23	-1.18801777787857	0.290440679166675	-4.0903973275617	4.30634817082866e-05	0.000555226249598103
GtRNAdb-mature-tRNA_Match_Genome-mature-tRNA-Arg-ACG	7014.12	1.68392377309678	0.326256613888307	5.16134754489073	2.45178516170855e-07	6.38425626421365e-06
GtRNAdb-mature-tRNA_CCA_end_Unmatch_Genome-mature-tRNA-Val-AAC_CCA_end	7018.89	0.734630916197765	0.275023861734587	2.6711533739815	0.0075591098880169	0.04840430175819
GtRNAdb-mature-tRNA_Match_Genome-mature-tRNA-Arg-TCT	7142.9	1.07562940387918	0.327926662445534	3.28009133462223	0.00103773485535616	0.00924907307324146
GtRNAdb-mature-tRNA_Match_Genome-mature-tRNA-Arg-TCG	7361.79	1.07550472028031	0.309861715801174	3.470918365954	0.000518681658089365	0.00502780468571297
GtRNAdb-mature-tRNA_Match_Genome-mature-tRNA-Arg-CCG	7410.77	0.809866003456022	0.29204847028058	2.77305339993035	0.00555330071619323	0.0381205110051132
rRNAdb-rRNA_Match_Genome-5S-rRNA	9862.16	-1.51038757230589	0.323565984480583	-4.66794300003597	3.0423026981276e-06	5.38690397748461e-05
miRBase-miRNA_Match_Genome-rno-mir-23a	10934.6	-1.6160676887417	0.268890090179479	-6.01014223939232	1.85360624396124e-09	8.79138961421619e-08
GtRNAdb-mature-tRNA_Match_Genome-mature-tRNA-Thr-TGT	12853.7	0.865834408175457	0.270680990916105	3.19872631338125	0.00138036142998595	0.0117507690962907
GtRNAdb-mature-tRNA_5_end_Match_Genome-mature-tRNA-Ala-AGC_5_end	14151.4	0.778040712651879	0.291824298830386	2.66612724084396	0.007673064559781	0.0487551661980343
miRBase-miRNA_Match_Genome-rno-mir-30c-1	14286.4	-1.75174264552764	0.322009592352384	-5.44003249322668	5.32708543603089e-08	1.72545596562171e-06
miRBase-miRNA_Match_Genome-rno-mir-30c-2	14512.2	-1.74227812975037	0.321045276570821	-5.42689227002543	5.7343715235836e-08	1.813153662695e-06
miRBase-miRNA_Match_Genome-rno-mir-26b	15517.2	-1.62526613257376	0.317271027443046	-5.12264276278902	3.01282824725003e-07	7.54912436292084e-06
GtRNAdb-mature-tRNA_5_end_Match_Genome-mature-tRNA-iMet-CAT_5_end	18467.7	0.882320000066689	0.301626058180997	2.92521145350523	0.00344222236951832	0.0253959517040018
miRBase-miRNA_Match_Genome-rno-mir-99a	19416	-1.92217644980338	0.289909334914897	-6.63026752956276	3.35079005194118e-11	2.78115574311118e-09
GtRNAdb-mature-tRNA_5_end_Match_Genome-mature-tRNA-Leu-TAG_5_end	20809.1	0.902373006649438	0.30044586095692	3.00344629070735	0.00266940661458526	0.020610302233542
rRNAdb-rRNA_Match_Genome-45S-rRNA	21192.7	1.80479565901545	0.296224917548164	6.09265308925946	1.11054554957553e-09	5.46223885124557e-08
GtRNAdb-mature-tRNA_5_end_Match_Genome-mature-tRNA-Cys-GCA_5_end	23693.5	0.803618776378655	0.300563061800797	2.67371103941996	0.0075017059128308	0.0483605119040743
GtRNAdb-mature-tRNA_Match_Genome-mature-tRNA-Leu-TAG	23919.9	0.839629891381304	0.292416100395967	2.87135315136323	0.00408718632455609	0.029822985928629
GtRNAdb-mature-tRNA_5_end_Match_Genome-mature-tRNA-Ala-CGC_5_end	25992.3	0.796455186104773	0.293832241501945	2.71057792035903	0.00671660649733502	0.044324636573737
GtRNAdb-mature-tRNA_Match_Genome-mature-tRNA-Ala-CGC	27374.3	0.815891960512417	0.293008388090097	2.78453448322967	0.00536046208931198	0.0370765294510745
GtRNAdb-mature-tRNA_5_end_Match_Genome-mature-tRNA-Ile-AAT_5_end	29191.7	1.51332889365033	0.349700758297981	4.32749674612036	1.50813572600194e-05	0.000232884214433788
miRBase-miRNA_Match_Genome-rno-mir-10b	31672.7	-1.29984846450631	0.349212124917672	-3.72223176618724	0.00019746963847233	0.00214950557287913
miRBase-miRNA_Match_Genome-rno-mir-10a	33659.9	-1.46327637619388	0.343598677883101	-4.25867871555583	2.05638778636216e-05	0.000295913533183004
miRBase-miRNA_Match_Genome-rno-mir-30d	33672.1	-1.26560108401241	0.303878734640538	-4.16482280508871	3.11594472325897e-05	0.000417977231564435
miRBase-miRNA_Match_Genome-rno-mir-30a	36291.6	-1.34653147592807	0.348627876206417	-3.86237466315174	0.000112290178851804	0.00131668601484654
GtRNAdb-mature-tRNA_Match_Genome-mature-tRNA-Cys-GCA	36682.1	0.792046622490346	0.289153240964831	2.73919330749151	0.00615901483989193	0.0413089480170529
GtRNAdb-mature-tRNA_Match_Genome-mature-tRNA-Ile-AAT	39276.8	1.07023512367707	0.332695272783678	3.21686303121279	0.00129600454660555	0.0111759353109881
GtRNAdb-mature-tRNA_Match_Genome-mature-tRNA-SeC-TCA	49467.3	1.39256513732111	0.309400228968054	4.50085360946805	6.76811084966101e-06	0.000108289773594576
ensembl-snoRNA_Match_Genome--	54021.9	1.89882816543362	0.326144484084474	5.82204592778523	5.81315684602344e-09	2.33935523985428e-07
GtRNAdb-mature-tRNA_5_end_Match_Genome-mature-tRNA-Ala-TGC_5_end	66759	1.04150335631247	0.303674199906751	3.42967350085153	0.000604307940140766	0.00573229246076384
miRBase-miRNA_Match_Genome-rno-mir-26a	66982.3	-1.2744559655534	0.269272214331194	-4.73296499870527	2.21263655484781e-06	4.13856527441957e-05
GtRNAdb-mature-tRNA_Match_Genome-mature-tRNA-Ala-TGC	69595.4	1.0559578763597	0.303067801254905	3.48422983895789	0.000493555453591366	0.00481942384095098
GtRNAdb-mature-tRNA_5_end_Match_Genome-mature-tRNA-Leu-AAG_5_end	70092.1	0.889120322565826	0.317172402593902	2.80327139213379	0.00505870812934899	0.0353577073461866
GtRNAdb-mature-tRNA_5_end_Match_Genome-mature-tRNA-Leu-TAA_5_end	72031.1	1.28696003968063	0.267414136651165	4.81261034213548	1.48971572349675e-06	2.99748860727831e-05
GtRNAdb-mature-tRNA_Match_Genome-mature-tRNA-Leu-AAG	77324.3	0.853477766071895	0.309278483371365	2.75957692487481	0.00578762595385512	0.0392141187077531
GtRNAdb-mature-tRNA_Match_Genome-mature-tRNA-Leu-TAA	90329.1	1.1473006776195	0.271242690409233	4.22979390113159	2.33905507777777e-05	0.000323569285759258
GtRNAdb-mature-tRNA_5_end_Match_Genome-mature-tRNA-Lys-TTT_5_end	135330	1.56173686092672	0.278172505268795	5.61427470848577	1.9738841662619e-08	6.89820571788368e-07
GtRNAdb-mature-tRNA_Match_Genome-mature-tRNA-Lys-TTT	158474	1.3801518461563	0.27573631839099	5.0053321020964	5.57658018101307e-07	1.2552031322687e-05
GtRNAdb-mature-tRNA_5_end_Match_Genome-mature-tRNA-Glu-CTC_5_end	190383	-1.18899038190679	0.279305265619818	-4.25695655707834	2.07228603810387e-05	0.000295913533183004
GtRNAdb-mature-tRNA_Match_Genome-mature-tRNA-Glu-CTC	205069	-1.09048776356097	0.279064292748898	-3.90765781182255	9.31951690643997e-05	0.00114595541219929
GtRNAdb-mature-tRNA_5_end_Match_Genome-mature-tRNA-Ser-GCT_5_end	551068	1.23437642769935	0.299016298618911	4.12812423068794	3.65734515654111e-05	0.000485695436788659
GtRNAdb-mature-tRNA_Match_Genome-mature-tRNA-Ser-GCT	565971	1.22545542671773	0.298844172550822	4.10065023606686	4.11990861339119e-05	0.000541054441480412

## Sheet: tsRNA
	baseMean	log2FoldChange	lfcSE	stat	pvalue	padj
GtRNAdb-mature-tRNA_CCA_end_Unmatch_Genome-mature-tRNA-Arg-TCT_CCA_end	420.676	-1.06927030023636	0.34301332289488	-3.11728504074475	0.00182525001299345	0.0146904970742746
GtRNAdb-mature-tRNA_Match_Genome-mature-tRNA-Glu-CTC	205069	-1.09048776356097	0.279064292748898	-3.90765781182255	9.31951690643997e-05	0.00114595541219929
GtRNAdb-mature-tRNA_CCA_end_Match_Genome-mature-tRNA-Leu-TAG_CCA_end	642.257	-1.13807506300152	0.353543690638369	-3.21905069482807	0.00128615744914444	0.0111635104082603
GtRNAdb-mature-tRNA_Unmatch_Genome-mature-tRNA-Thr-AGT	818.221	-1.15082515842125	0.329790108357996	-3.48956845355712	0.000483801130992689	0.00475916964413549
GtRNAdb-mature-tRNA_5_end_Match_Genome-mature-tRNA-Glu-CTC_5_end	190383	-1.18899038190679	0.279305265619818	-4.25695655707834	2.07228603810387e-05	0.000295913533183004
GtRNAdb-mature-tRNA_CCA_end_Unmatch_Genome-mature-tRNA-Thr-AGT_CCA_end	797.733	-1.19357485683641	0.332255492118298	-3.59234048841981	0.000327721259569621	0.00334779871314198
GtRNAdb-mature-tRNA_CCA_end_Match_Genome-mature-tRNA-Gln-TTG_CCA_end	710.825	-1.27285182226934	0.318041013388727	-4.0021625157935	6.27661603726686e-05	0.000786353405423622
GtRNAdb-mature-tRNA_CCA_end_Match_Genome-mature-tRNA-Lys-CTT_CCA_end	2810.88	-1.30988043990545	0.27633388762219	-4.74020921276346	2.13497654434827e-06	4.05035550127786e-05
GtRNAdb-mature-tRNA_CCA_end_Match_Genome-mature-tRNA-Gly-CCC_CCA_end	335.435	-1.31996223094963	0.328145944906596	-4.02248527351252	5.7587255855022e-05	0.000735344959379512
GtRNAdb-mature-tRNA_CCA_end_Match_Genome-mature-tRNA-Gly-GCC_CCA_end	665.517	-1.3940656054746	0.300549625884678	-4.63838742560773	3.5113810669306e-06	6.05599228166732e-05
GtRNAdb-mature-tRNA_CCA_end_Match_Genome-mature-tRNA-Lys-TTT_CCA_end	4193.76	-1.54440926084551	0.342085282434175	-4.51469075154581	6.34092261546659e-06	0.000102692015040727
GtRNAdb-mature-tRNA_CCA_end_Match_Genome-mature-tRNA-Gln-CTG_CCA_end	3327.65	-1.58831098883545	0.312555984624621	-5.08168477638658	3.741018599811e-07	8.87155839383752e-06
GtRNAdb-mature-tRNA_CCA_end_Match_Genome-mature-tRNA-Cys-GCA_CCA_end	1340.37	-1.61986516116958	0.346695016397822	-4.67230587275254	2.9783697208514e-06	5.34496620174414e-05
GtRNAdb-mature-tRNA_CCA_end_Match_Genome-mature-tRNA-Ser-GCT_CCA_end	817.608	-1.6398286156194	0.345179230051622	-4.75065841990019	2.02755377623715e-06	3.90230639832309e-05
GtRNAdb-mature-tRNA_CCA_end_Match_Genome-mature-tRNA-Gly-TCC_CCA_end	321.992	-1.73648493184623	0.339966448848961	-5.10781266129502	3.2590953240062e-07	8.01496035237079e-06
GtRNAdb-mature-tRNA_Unmatch_Genome-mature-tRNA-Ser-CGA	370.032	-1.99086994130098	0.319891059933271	-6.22358731036832	4.85914202297519e-10	2.58117624260442e-08
GtRNAdb-mature-tRNA_Match_Genome-mature-tRNA-Ile-TAT	501.958	-2.07341995144532	0.494273041762414	-4.19488779734413	2.73006696431707e-05	0.00036995193149113
GtRNAdb-mature-tRNA_CCA_end_Unmatch_Genome-mature-tRNA-Ser-CGA_CCA_end	333.659	-2.08874476566553	0.327389108297792	-6.38000688699032	1.77080020124142e-10	1.03974424096647e-08
GtRNAdb-mature-tRNA_CCA_end_Match_Genome-mature-tRNA-iMet-CAT_CCA_end	1396.92	-2.61809706667435	0.415268357114354	-6.30459080693547	2.88956272782663e-10	1.59889137606407e-08
GtRNAdb-mature-tRNA_CCA_end_Match_Genome-mature-tRNA-Ala-AGC_CCA_end	441.155	-2.83918837393162	0.417642031654777	-6.79813849837435	1.05979550193436e-11	1.00529173326345e-09
GtRNAdb-mature-tRNA_CCA_end_Match_Genome-mature-tRNA-Leu-CAG_CCA_end	4772.99	-3.00786728073268	0.390136141232346	-7.70978887326756	1.26026050306814e-14	1.67362594807449e-12
GtRNAdb-mature-tRNA_CCA_end_Match_Genome-mature-tRNA-Asn-GTT_CCA_end	902.274	-3.32580544104053	0.333553494922206	-9.97083074130643	2.04511017964624e-23	4.52651053095035e-21
GtRNAdb-mature-tRNA_CCA_end_Match_Genome-mature-tRNA-Leu-CAA_CCA_end	2638.36	-3.40952663829009	0.397560673163226	-8.57611647339737	9.81301778754407e-18	1.62896095273232e-15
GtRNAdb-mature-tRNA_CCA_end_Match_Genome-mature-tRNA-His-GTG_CCA_end	561.565	-3.61890787324069	0.34475983794497	-10.4968951569653	8.92681058791774e-26	2.37096089215095e-23
GtRNAdb-mature-tRNA_CCA_end_Match_Genome-mature-tRNA-Arg-CCT_CCA_end	548.698	-4.65176196926673	0.40241567995714	-11.559594222974	6.60200175623496e-31	2.92248611076001e-28
GtRNAdb-mature-tRNA_Unmatch_Genome-mature-tRNA-Leu-TAG	591.494	1.0052961534118	0.31669829126764	3.17430242325568	0.00150197107426038	0.0126241619406189
GtRNAdb-mature-tRNA_5_end_Match_Genome-mature-tRNA-Ala-TGC_5_end	66759	1.04150335631247	0.303674199906751	3.42967350085153	0.000604307940140766	0.00573229246076384
GtRNAdb-mature-tRNA_CCA_end_Unmatch_Genome-mature-tRNA-Leu-AAG_CCA_end	1322.61	1.04998915404199	0.309646311569233	3.39093060311565	0.00069655736339566	0.00642770035982929
GtRNAdb-mature-tRNA_Unmatch_Genome-mature-tRNA-Leu-AAG	1372.68	1.05153144510506	0.30937959579991	3.39883902940108	0.000676725325488413	0.00632881149470854
GtRNAdb-mature-tRNA_Match_Genome-mature-tRNA-Ala-TGC	69595.4	1.0559578763597	0.303067801254905	3.48422983895789	0.000493555453591366	0.00481942384095098
GtRNAdb-mature-tRNA_Match_Genome-mature-tRNA-Ile-AAT	39276.8	1.07023512367707	0.332695272783678	3.21686303121279	0.00129600454660555	0.0111759353109881
GtRNAdb-mature-tRNA_Match_Genome-mature-tRNA-Arg-TCG	7361.79	1.07550472028031	0.309861715801174	3.470918365954	0.000518681658089365	0.00502780468571297
GtRNAdb-mature-tRNA_Match_Genome-mature-tRNA-Arg-TCT	7142.9	1.07562940387918	0.327926662445534	3.28009133462223	0.00103773485535616	0.00924907307324146
GtRNAdb-mature-tRNA_CCA_end_Unmatch_Genome-mature-tRNA-His-GTG_CCA_end	401.531	1.12029021199614	0.333277623351034	3.36143243201229	0.000775393252349822	0.00705289204877098
GtRNAdb-mature-tRNA_Match_Genome-mature-tRNA-Leu-TAA	90329.1	1.1473006776195	0.271242690409233	4.22979390113159	2.33905507777777e-05	0.000323569285759258
GtRNAdb-mature-tRNA_Match_Genome-mature-tRNA-Ser-GCT	565971	1.22545542671773	0.298844172550822	4.10065023606686	4.11990861339119e-05	0.000541054441480412
GtRNAdb-mature-tRNA_5_end_Match_Genome-mature-tRNA-Ser-GCT_5_end	551068	1.23437642769935	0.299016298618911	4.12812423068794	3.65734515654111e-05	0.000485695436788659
GtRNAdb-mature-tRNA_5_end_Match_Genome-mature-tRNA-Arg-TCT_5_end	6455.83	1.26797365056689	0.325087025100658	3.90041297456976	9.60287407864387e-05	0.00116996484187514
GtRNAdb-mature-tRNA_5_end_Match_Genome-mature-tRNA-Leu-TAA_5_end	72031.1	1.28696003968063	0.267414136651165	4.81261034213548	1.48971572349675e-06	2.99748860727831e-05
GtRNAdb-mature-tRNA_Match_Genome-mature-tRNA-Lys-TTT	158474	1.3801518461563	0.27573631839099	5.0053321020964	5.57658018101307e-07	1.2552031322687e-05
GtRNAdb-mature-tRNA_Match_Genome-mature-tRNA-SeC-TCA	49467.3	1.39256513732111	0.309400228968054	4.50085360946805	6.76811084966101e-06	0.000108289773594576
GtRNAdb-mature-tRNA_5_end_Match_Genome-mature-tRNA-Ile-AAT_5_end	29191.7	1.51332889365033	0.349700758297981	4.32749674612036	1.50813572600194e-05	0.000232884214433788
GtRNAdb-mature-tRNA_5_end_Match_Genome-mature-tRNA-Thr-TGT_5_end	6344.05	1.51516647639151	0.279930115902081	5.41265976870281	6.20954073885412e-08	1.91773723283681e-06
GtRNAdb-mature-tRNA_5_end_Match_Genome-mature-tRNA-Phe-GAA_5_end	541.824	1.51990993190288	0.326199495565293	4.65944905668516	3.17056849150708e-06	5.54015125884394e-05
GtRNAdb-mature-tRNA_5_end_Match_Genome-mature-tRNA-Lys-TTT_5_end	135330	1.56173686092672	0.278172505268795	5.61427470848577	1.9738841662619e-08	6.89820571788368e-07
GtRNAdb-mature-tRNA_Match_Genome-mature-tRNA-Arg-ACG	7014.12	1.68392377309678	0.326256613888307	5.16134754489073	2.45178516170855e-07	6.38425626421365e-06
GtRNAdb-mature-tRNA_3_end_Match_Genome-mature-tRNA-Pro-TGG_3_end	227.269	1.69637039760044	0.4033025169434	4.20619839037234	2.59702276305488e-05	0.000355551157663596
GtRNAdb-mature-tRNA_3_end_Match_Genome-mature-tRNA-Pro-AGG_3_end	267.096	1.70526089655949	0.395127586891711	4.31572219488394	1.59081943054044e-05	0.00024277828989773
GtRNAdb-mature-tRNA_3_end_Match_Genome-mature-tRNA-Leu-CAG_3_end	266.549	1.72127537408561	0.406278419853349	4.23668915200302	2.26839832992755e-05	0.000317098208646714
GtRNAdb-mature-tRNA_3_end_Match_Genome-mature-tRNA-Glu-CTC_3_end	275.92	1.84566042415737	0.341997077715062	5.39671402015633	6.78724395931251e-08	2.04851363135614e-06
GtRNAdb-mature-tRNA_3_end_Match_Genome-mature-tRNA-Thr-TGT_3_end	669.657	2.368284103219	0.514335617050009	4.60455007335946	4.13358553373474e-06	7.03769434461504e-05
GtRNAdb-mature-tRNA_3_end_Match_Genome-mature-tRNA-Ala-TGC_3_end	264.974	2.72195265108964	0.440249504494371	6.18275006173105	6.29944110012771e-10	3.21756068498831e-08

## Sheet: piRNA
	baseMean	log2FoldChange	lfcSE	stat	pvalue	padj
piRNAdb-piRNA_Match_Genome-rno-piR-61384	286.875	2.91382951415711	0.451766772416818	6.44985353519689	1.11958297502481e-10	7.82529574122607e-09
piRNAdb-piRNA_Match_Genome-rno-piR-61534	382.94	2.82731981831261	0.479679476070885	5.8941855121081	3.76533967849418e-09	1.56261596657508e-07

## Sheet: microRNA
	baseMean	log2FoldChange	lfcSE	stat	pvalue	padj
miRBase-miRNA_Match_Genome-rno-mir-204	2423.73	-1.00704162261133	0.276767420455039	-3.63858441486945	0.000274140771755177	0.00286660586528248
miRBase-miRNA_Match_Genome-rno-mir-190b	252.71	-1.00818062445917	0.364907217403967	-2.76284100827493	0.00573006707656677	0.0390232260393881
miRBase-miRNA_Match_Genome-rno-mir-30b	3778.81	-1.02816199001649	0.285543723255783	-3.60071647975076	0.000317341479550138	0.00326689523133785
miRBase-miRNA_Match_Genome-rno-mir-140	1787.41	-1.06235971958723	0.289846145675776	-3.66525391293487	0.000247093308581922	0.00264628962739349
miRBase-miRNA_Match_Genome-rno-mir-451	869.13	-1.06629387996969	0.299319742741307	-3.56239074043057	0.000367492869300275	0.00366940248444185
miRBase-miRNA_Match_Genome-rno-mir-148b	305.043	-1.08273153350848	0.347046587220504	-3.11984492393391	0.00180946273915173	0.0146904970742746
miRBase-miRNA_Match_Genome-rno-mir-186	925.759	-1.11434439124292	0.337609438404417	-3.30069087081643	0.000964470850892501	0.00865417087827866
miRBase-miRNA_Match_Genome-rno-mir-27b	6944.23	-1.18801777787857	0.290440679166675	-4.0903973275617	4.30634817082866e-05	0.000555226249598103
miRBase-miRNA_Match_Genome-rno-mir-146a	4734.2	-1.22134989186125	0.287428915661107	-4.24922415704785	2.14512180867986e-05	0.000303055506587963
miRBase-miRNA_Match_Genome-rno-mir-30d	33672.1	-1.26560108401241	0.303878734640538	-4.16482280508871	3.11594472325897e-05	0.000417977231564435
miRBase-miRNA_Match_Genome-rno-mir-26a	66982.3	-1.2744559655534	0.269272214331194	-4.73296499870527	2.21263655484781e-06	4.13856527441957e-05
miRBase-miRNA_Match_Genome-rno-mir-10b	31672.7	-1.29984846450631	0.349212124917672	-3.72223176618724	0.00019746963847233	0.00214950557287913
miRBase-miRNA_Match_Genome-rno-mir-181a-2	2235.65	-1.30439287648965	0.337485442364911	-3.86503449555982	0.000111073500345431	0.00131668601484654
miRBase-miRNA_Match_Genome-rno-mir-181a-1	2212.16	-1.30854004596084	0.341260180500379	-3.83443519265028	0.000125853147849041	0.00144080155468557
miRBase-miRNA_Match_Genome-rno-mir-203a	956.796	-1.33217148708055	0.380617176076223	-3.50002987467324	0.000465206018576272	0.00461039994529321
miRBase-miRNA_Match_Genome-rno-mir-30a	36291.6	-1.34653147592807	0.348627876206417	-3.86237466315174	0.000112290178851804	0.00131668601484654
miRBase-miRNA_Match_Genome-rno-mir-23b	3959.95	-1.35886037448204	0.267048858383497	-5.08843356495699	3.61033212860839e-07	8.7173110305308e-06
miRBase-miRNA_Match_Genome-rno-mir-181b-2	325.005	-1.3782125121911	0.373238995587574	-3.69257373555365	0.000221995945967855	0.00239683427841716
miRBase-miRNA_Match_Genome-rno-mir-328a	330.237	-1.39780935012609	0.367067678189634	-3.80804258500787	0.000140071155314751	0.00158986747229051
miRBase-miRNA_Match_Genome-rno-mir-24-2	2671.99	-1.43983591537153	0.379989488252907	-3.78914669979825	0.000151165630598539	0.00170125387656661
miRBase-miRNA_Match_Genome-rno-mir-27a	1133.06	-1.44991363867984	0.29252571242064	-4.95653399724028	7.17618153594886e-07	1.58832817995668e-05
miRBase-miRNA_Match_Genome-rno-mir-92a-1	4564.94	-1.46127984107038	0.278675132149731	-5.24366788596421	1.57415440644424e-07	4.2662796974652e-06
miRBase-miRNA_Match_Genome-rno-mir-10a	33659.9	-1.46327637619388	0.343598677883101	-4.25867871555583	2.05638778636216e-05	0.000295913533183004
miRBase-miRNA_Match_Genome-rno-mir-24-1	2407.21	-1.48823422786035	0.395819668563003	-3.75987942505052	0.000169995270360664	0.00188128099199135
miRBase-miRNA_Match_Genome-rno-mir-195	1008.8	-1.50754684691658	0.308117138382038	-4.89277180371367	9.94256646239372e-07	2.09582988286649e-05
miRBase-miRNA_Match_Genome-rno-mir-361	277.628	-1.55000927657743	0.328442791663489	-4.71926714764232	2.36695810272141e-06	4.36572272279726e-05
miRBase-miRNA_Match_Genome-rno-mir-296	214.299	-1.60368864764578	0.407733126227981	-3.93318213430881	8.38286700130911e-05	0.0010404156427793
miRBase-miRNA_Match_Genome-rno-mir-23a	10934.6	-1.6160676887417	0.268890090179479	-6.01014223939232	1.85360624396124e-09	8.79138961421619e-08
miRBase-miRNA_Match_Genome-rno-mir-26b	15517.2	-1.62526613257376	0.317271027443046	-5.12264276278902	3.01282824725003e-07	7.54912436292084e-06
miRBase-miRNA_Match_Genome-rno-mir-181b-1	281.143	-1.62861265933574	0.356915450920211	-4.563020892306	5.04227948572258e-06	8.26684834202418e-05
miRBase-miRNA_Match_Genome-rno-mir-218a-1	345.054	-1.65721402926823	0.373139906351129	-4.44126720584201	8.94306611299034e-06	0.000141385616643466
miRBase-miRNA_Match_Genome-rno-mir-218a-2	351.662	-1.69592298777381	0.370974152249017	-4.57153949269063	4.84154017028367e-06	8.03695668267089e-05
miRBase-miRNA_Match_Genome-rno-mir-339	259.95	-1.72785208230474	0.357769853013603	-4.82950720344524	1.36871363285707e-06	2.79638723759107e-05
miRBase-miRNA_Match_Genome-rno-mir-199a	4001.17	-1.73948007903903	0.301856483994582	-5.76260630886514	8.2824839850365e-09	3.2350408035672e-07
miRBase-miRNA_Match_Genome-rno-mir-30c-2	14512.2	-1.74227812975037	0.321045276570821	-5.42689227002543	5.7343715235836e-08	1.813153662695e-06
miRBase-miRNA_Match_Genome-rno-mir-196a	1024.47	-1.74385681165669	0.404302943576688	-4.31324292677558	1.60877180052713e-05	0.00024277828989773
miRBase-miRNA_Match_Genome-rno-mir-30c-1	14286.4	-1.75174264552764	0.322009592352384	-5.44003249322668	5.32708543603089e-08	1.72545596562171e-06
miRBase-miRNA_Match_Genome-rno-mir-196b-1	425.272	-1.77759534237603	0.372263667335979	-4.77509759439321	1.79620123644913e-06	3.50787535588888e-05
miRBase-miRNA_Match_Genome-rno-mir-196b-2	425.272	-1.77759534237603	0.372263667335979	-4.77509759439321	1.79620123644913e-06	3.50787535588888e-05
miRBase-miRNA_Match_Genome-rno-mir-320	1121.75	-1.77796568887223	0.364797234980485	-4.87384639570347	1.09446099737061e-06	2.27100656954402e-05
miRBase-miRNA_Match_Genome-rno-mir-221	2562.48	-1.82500907546834	0.306772371705013	-5.94906596485565	2.69676948121547e-09	1.19376995701805e-07
miRBase-miRNA_Match_Genome-rno-mir-22	3808.31	-1.86644473309895	0.367680500892819	-5.07626792437119	3.84920428601022e-07	8.96797068740626e-06
miRBase-miRNA_Match_Genome-rno-mir-99a	19416	-1.92217644980338	0.289909334914897	-6.63026752956276	3.35079005194118e-11	2.78115574311118e-09
miRBase-miRNA_Match_Genome-rno-mir-222	1296.84	-2.00678883790789	0.314670119734976	-6.37743691583447	1.80076186311963e-10	1.03974424096647e-08
miRBase-miRNA_Match_Genome-rno-mir-100	2199.66	-2.04868692757022	0.344716681475276	-5.94310353303037	2.7967566510079e-09	1.19809446210919e-07
miRBase-miRNA_Match_Genome-rno-mir-126a	3248.37	-2.05023258399523	0.364239783645216	-5.62879914839901	1.81468558132854e-08	6.51324987028189e-07
miRBase-miRNA_Match_Genome-rno-mir-223	605.869	-2.07075212527968	0.32325073998511	-6.40602439262804	1.49363078178458e-10	9.4454365629044e-09
miRBase-miRNA_Match_Genome-rno-mir-99b	1533.91	-2.11838131495916	0.29428974720149	-7.19828446319871	6.09748349265641e-13	6.74788173187309e-11
miRBase-miRNA_Match_Genome-rno-mir-152	428.999	-2.36675241064858	0.368775173388742	-6.41787349430294	1.38191012073403e-10	9.17588320167394e-09
miRBase-miRNA_Match_Genome-rno-mir-107	246.385	-2.67973856919678	0.407225367066069	-6.58048045607634	4.68930472114278e-11	3.5579712990438e-09
miRBase-miRNA_Match_Genome-rno-mir-194-1	269.113	-3.52333207963312	0.441930970625539	-7.97258466553263	1.55389709921247e-15	2.29286149750463e-13
miRBase-miRNA_Match_Genome-rno-mir-378a	1109.85	-3.56621398460802	0.285081275770678	-12.5094640992021	6.62697987348763e-36	4.40031463599578e-33
miRBase-miRNA_Match_Genome-rno-mir-194-2	754.304	-3.95329438882929	0.357974965876029	-11.0434940028694	2.35686427230302e-28	7.82478938404602e-26
miRBase-miRNA_Match_Genome-rno-mir-455	434.352	-4.02167844566192	0.443016282959224	-9.07794724563676	1.10641764874473e-19	2.09903233933287e-17
miRBase-miRNA_Match_Genome-rno-mir-192	1065.89	-4.44037952841841	0.311264250382117	-14.2656264667956	3.58359297107899e-46	4.7590114655929e-43
miRBase-miRNA_Match_Genome-rno-mir-3068	218.934	1.25575845813609	0.402794240469638	3.11761771139513	0.00182319124012755	0.0146904970742746
